# Supplementary material for: Using the natural potential of chromone: Development of small molecules as multi-ion detectors
Source: Royal Society of Chemistry journal article supplement (doi:10.1039/c2md00286h), 2011-12-08
Supplement: c2md00286h.pdf [file c2md00286h.pdf]

**Supporting Information**

**Using Natural Potential of Chromone: Development of Small Molecules as  
Multi-ion Detectors**

Palwinder Singh\*, Matinder Kaur

Department of Chemistry, UGC Sponsored Centre for Advanced Studies, Guru Nanak Dev

University, Amritsar-143005, India

| S.No | Table of contents                                                                                                                                                                                               | Page No. |
|------|-----------------------------------------------------------------------------------------------------------------------------------------------------------------------------------------------------------------|----------|
| 1.   | General information                                                                                                                                                                                             | S3       |
| 2.   | Experimental Data for compounds <b>3-14</b>                                                                                                                                                                     | S4-S24   |
| 3.   | UV-vis spectra of compounds <b>3-13</b> in ethanol/water (pH 7.2, v/v 1:1) upon addition of increasing amount of Hg(ClO <sub>4</sub> ) <sub>2</sub> / Fe(ClO <sub>4</sub> ) <sub>3</sub> (0.1 equiv - 1 equiv). | S25-S33  |
| 4.   | Selectivity experiments for compounds <b>3-13</b>                                                                                                                                                               | S33-S34  |
| 5.   | Competitive experiments for compounds <b>4-13</b>                                                                                                                                                               | S34-S39  |
| 6.   | Job's plot for compounds <b>3-13</b>                                                                                                                                                                            | S39-S44  |
| 7.   | Effect of pH on the absorbance of compound <b>3</b> monitored at 417 nm                                                                                                                                         | S45      |
| 8.   | Bar graph showing selectivity of compounds <b>6, 7, 12</b> and <b>13</b> towards Hg <sup>2+</sup>                                                                                                               | S45-S47  |
| 9.   | Part of IR spectrum of compound <b>3</b> and <b>3.Hg<sup>2+</sup></b> .                                                                                                                                         | S47      |
| 10.  | UV-vis spectra of compounds <b>3</b> in ethanol/water (pH 7.2, v/v 1:1) upon addition of increasing amount of sodium cyanide (0.1 equiv - 1 equiv).                                                             | S48      |
| 11.  | UV-vis spectra of compounds <b>3</b> in acetonitrile/chloroform upon addition of increasing amount of TBACN (0.1 equiv - 1 equiv).                                                                              | S48-S49  |
| 12.  | Selectivity and competitive experiment of compound <b>3</b> in presence of various anions                                                                                                                       | S49-S50  |
| 13.  | UV-vis spectra of compound <b>3</b> on addition of CN <sup>-</sup> at different pH.                                                                                                                             | S50      |
| 14.  | Table of binding constants for compounds <b>4-13</b> .                                                                                                                                                          | S51      |

### Equation for calculation of binding constants

Binding constants of compound-anion complex were calculated using Benesi-Hildebrand

Equation.  $1/(A_f - A_{obs}) = 1/(A_f - A_{fc}) + 1/K (A_f - A_{fc}) [\text{Ligand}]$

Where  $A_f$  is absorbance of free host,  $A_{obs}$  is absorbance observed,  $A_{fc}$  is absorbance at saturation,  $K$  is the binding constant.

### EXPERIMENTAL SECTION

Melting points were determined in capillaries and are uncorrected.  $^1\text{H}$  and  $^{13}\text{C}$  NMR spectra were recorded on JEOL 300 MHz and 75 MHz NMR spectrometer, respectively using  $\text{CDCl}_3$  and/or  $\text{DMSO-d}_6$  as solvent. Chemical shifts are given in ppm with TMS as internal reference.  $J$  values are given in Hertz. Signals are abbreviated as singlet, s; doublet, d; double-doublet, dd; triplet, t; multiplet, m. In  $^{13}\text{C}$  NMR spectral data, +ve, -ve terms correspond to  $\text{CH}_3$ ,  $\text{CH}$ ,  $\text{CH}_2$  signals in DEPT-135 NMR spectra. Chromatography was performed with silica 100-200 mesh and reactions were monitored by thin layer chromatography (TLC) with silica plates coated with silica gel HF-254. Elemental analysis was performed on Thermoelectron FLASH EA1112 CHN analyzer. Reactions under microwaves were performed using microwave oven (INALSA model 1MW17EG) with microwave power 700 W and operating frequency 2450 MHz. IR and UV spectral data were recorded on Varian 660-IR FT-IR Spectrometer and BioTek PowerWave XS instruments respectively.

### Equation for calculation of correlation coefficient from linear regression analysis

$$r = \frac{\sum[(X_i - \bar{X})(Y_i - \bar{Y})]}{\sqrt{\sum(X_i - \bar{X})^2 \sum(Y_i - \bar{Y})^2}}$$

### Equation for calculation of correlation coefficient from partial regression analysis

$$r_{12.3} = \frac{r_{12} - r_{13} \times r_{23}}{\sqrt{(1 - r_{13}^2)(1 - r_{23}^2)}}$$

Here, 1= compound 1, 2=  $\text{Fe}^{3+}$ , 3=  $\text{Hg}^{2+}$

$r_{12}$  = partial correlation between compound **3** and  $\text{Fe}^{3+}$

$r_{13}$  = partial correlation between compound **3** and  $\text{Hg}^{2+}$

$r_{12.3}$  = partial correlation between compound **3** and  $\text{Fe}^{3+}$  eliminating the effect of  $\text{Hg}^{2+}$

$r_{13.2}$  = partial correlation between compound **3** and  $\text{Hg}^{2+}$  eliminating the effect of  $\text{Fe}^{3+}$  (same formula as for  $r_{12.3}$ )

**1,3-Dimethyl-5-((4-oxo-4H-chromen-3-yl)methylene)pyrimidine-2,4,6(1H,3H,5H)-trione**

**(3):** Creamish solid, 83% yield, mp 185 °C;  $\nu_{\max}$  (KBr): 1685, 1659, 1612 (C=O),  $^1\text{H}$  NMR (300 MHz,  $\text{CDCl}_3$ ):  $\delta$  3.45 (s, 3H, 2 $\times$ CH<sub>3</sub>), 7.46-7.71 (m, 2H, ArH), 7.73-7.77 (m, 1H, ArH), 8.28 (dd,  $J^3 = 7.8$  Hz,  $J^4 = 1.5$  Hz, 1H, ArH), 8.88 (s, 1H), 9.79 (s, 1H, 2-H).  $^{13}\text{C}$  NMR (normal/DEPT-135) ( $\text{CDCl}_3$ ):  $\delta$  28.4 (+ve, CH<sub>3</sub>), 29.0 (+ve, CH<sub>3</sub>), 117.9 (+ve, CH), 118.3 (+ve, CH), 118.3 (+ve, CH), 123.5 (+ve, CH), 126.3 (+ve, CH), 126.5 (+ve, CH), 134.5 (C), 148.7 (C), 151.0 (C), 155.6 (C), 161.2 (C), 161.7 (C), 163.50 (C), 175.2 (C). FAB mass  $m/z$  312 ( $\text{M}^+ + 1$ ); (Found: C 61.56, H 4.13, N 9.27;  $\text{C}_{16}\text{H}_{12}\text{N}_2\text{O}_5$  requires C 61.54, H 3.87, N 8.97).

**5-((6-Isopropyl-4-oxo-4H-chromen-3-yl)methylene)-1,3-dimethylpyrimidine-2,4,6(1H,3H,5H)-trione (4):**

Creamish solid, 92% yield, mp 152 °C;  $\nu_{\max}$  (KBr): 1730, 1675, 1583 (C=O).  $^1\text{H}$  NMR (300 MHz,  $\text{CDCl}_3$ ):  $\delta$  = 1.27 (s, 3H; CH<sub>3</sub>), 1.29 (s, 3H; CH<sub>3</sub>), 3.01-3.05 (m, 1H; CH), 3.37 (s, 3H; CH<sub>3</sub>), 3.40 (s, 3H; CH<sub>3</sub>), 7.43 (d,  $J = 8.4$  Hz, 1H; ArH), 7.57 (dd,  $^3J = 8.5$  Hz,  $^4J = 2.4$  Hz, 1H; ArH), 8.09 (d,  $J = 2.4$  Hz, 1H; ArH), 8.88 (s, 1H; ArH), 9.77 ppm (s, 1H; 2-H);  $^{13}\text{C}$  NMR (normal/DEPT-135) ( $\text{CDCl}_3$ ):  $\delta$  24.2 (+ve, CH<sub>3</sub>), 28.8 (+ve, CH<sub>3</sub>), 29.4 (+ve, CH<sub>3</sub>), 34.2 (+ve, CH<sub>3</sub>), 118.2 (+ve, CH), 118.5 (C), 118.6 (C), 123.8 (+ve, CH), 133.8 (+ve, CH), 147.9 (+ve, CH), 149.6 (C), 151.5 (C), 154.5 (C), 161.7 (C), 163.9 (+ve, CH), 175.8 (C). FAB mass  $m/z$  355 ( $\text{M}^+ + 1$ ); (Found: C 64.40, H 5.12, N 7.91;  $\text{C}_{19}\text{H}_{18}\text{N}_2\text{O}_5$  requires C 64.41, H 5.21, N 7.96).

**5-((6-Bromo-4-oxo-4H-chromen-3-yl)methylene)-1,3-dimethylpyrimidine-2,4,6(1H,3H,5H)-trione (5):**

Creamish solid, 97% yield, mp 236 °C;  $\nu_{\max}$  (KBr): 1733, 1668, 1576 (C=O).  $^1\text{H}$  NMR (300 MHz,  $\text{CDCl}_3$ )  $\delta$  = 3.40 (s, 3H; CH<sub>3</sub>), 3.47 (s, 3H; CH<sub>3</sub>), 7.41 (d,  $J = 9$  Hz, 1H; ArH), 7.79 (dd,  $^3J = 8.8$  Hz,  $^4J = 2.7$  Hz, 1H; ArH), 8.38 (d,  $J = 2.4$  Hz, 1H; ArH), 8.78 (s, 1H; ArH), 9.71 (s, 1H; 2-H);  $^{13}\text{C}$  NMR (normal/DEPT-135) ( $\text{CDCl}_3$ ):  $\delta$  24.7 (+ve, CH<sub>3</sub>), 25.3 (+ve, CH<sub>3</sub>), 114.3 (C), 115.1 (C), 116.5 (+ve, CH), 125.3 (+ve, CH), 133.7, (+ve, CH), 144.3 (+ve, CH), 150.6 (C), 157.4 (C), 159.3 (C); FAB mass  $m/z$  392 ( $\text{M}^+ + 1$ ). (Found: C 49.13, H 2.83, N 7.16;  $\text{C}_{16}\text{H}_{11}\text{BrN}_2\text{O}_5$  requires C 49.12, H 2.84, N 7.17).

**1,3-Dimethyl-5-((6-nitro-4-oxo-4H-chromen-3-yl)methylene)pyrimidine-2,4,6(1H,3H,5H)-trione (6):**

Creamish solid, 95% yield, mp 200 °C;  $\nu_{\max}$  (KBr): 1734, 1672, 1623 (C=O).  $^1\text{H}$  NMR (300 MHz,  $\text{CDCl}_3$ ):  $\delta$  = 2.00 (s, 3H; CH<sub>3</sub>), 7.14-7.41 (m, 2H; ArH), 7.44-7.46 (m, 2H; ArH), 7.89-8.01 (m, 1H; ArH);  $^{13}\text{C}$  NMR (normal/DEPT-135) ( $\text{CDCl}_3$ ):  $\delta$  28.5 (+ve, CH<sub>3</sub>), 29.1

(+ve, CH<sub>3</sub>), 118.7 (C), 120.2 (+ve, CH), 123.1 (+ve, CH), 123.8 (C), 128.7 (+ve, CH), 145.4 (C), 146.7 (+ve, CH), 150.8 (C), 158.4 (C), 161.0 (C), 161.3 (C), 162.4 (+ve, CH), 173.8 (C); FAB mass  $m/z$  358 ( $M^+$ +1). (Found: C 53.79, H 3.10, N 11.76; C<sub>16</sub>H<sub>11</sub>N<sub>3</sub>O<sub>7</sub> requires C 53.80, H 3.09, N 11.77).

**5-((6-Fluoro-8-nitro-4-oxo-4H-chromen-3-yl)methylene)-1,3-dimethylpyrimidine-2,4,6(1H, 3H,5H)-trione (7):** Creamish solid, 97% yield, mp 190 °C;  $\nu_{\max}$  (KBr): 1681, 1593, 1537 (C=O). <sup>1</sup>H NMR (300 MHz, CDCl<sub>3</sub>):  $\delta$  = 3.38 (s, 3H; CH<sub>3</sub>), 3.40 (s, 3H; CH<sub>3</sub>), 8.12 (dd, <sup>3</sup> $J$  = 7.2 Hz, <sup>4</sup> $J$  = 3 Hz, 1H; ArH), 8.23 (dd, <sup>3</sup> $J$  = 6.9 Hz, <sup>4</sup> $J$  = 3.3 Hz, 1H; ArH), 8.66 (s, 1H; CH), 10.32 (s, 1H; =H); <sup>13</sup>C NMR (normal/DEPT-135) (CDCl<sub>3</sub>):  $\delta$  28.5 (+ve, CH<sub>3</sub>), 29.1 (+ve, CH<sub>3</sub>), 117.6 (+ve, CH), 117.9 (+ve, CH), 118.3 (C), 118.8 (+ve, CH), 119.2 (+ve, CH), 120.5 (C), 126.6 (C), 145.9 (+ve, CH), 150.8 (C), 160.9 (C), 161.2 (C), 161.8 (+ve, CH), 172.6 (C); FAB mass  $m/z$  376 ( $M^+$ +1). (Found: C 51.25, H 2.69, N 11.24; C<sub>16</sub>H<sub>10</sub>FN<sub>3</sub>O<sub>7</sub> requires C 51.20, H 2.68, N 11.21).

**5-(4-Oxo-4H-chromen-3-ylmethylene)-pyrimidine-2,4,6-trione (8) :**

Creamish solid, 88% yield, mp >240 °C;  $\nu_{\max}$  (KBr): 3199, 3089 (NH), 1756, 1701 (C=O).

**(4Z)-1-(3-Chlorophenyl)-3-methyl-4-((4-oxo-4H-chromen-3-yl)methylene)-1H-pyrazol-5(4H)-one (9):** Orange solid, 87% yield, mp 227 °C;  $\nu_{\max}$  (KBr): 1680, 1610 (C=O). <sup>1</sup>H NMR (300 MHz, CDCl<sub>3</sub>):  $\delta$  = 2.39 (s, 3H; CH<sub>3</sub>), 7.17-7.18 (m, 1H; ArH), 7.33 (t,  $J$  = 8.1 Hz, 1H; ArH), 7.50-7.58 (m, 2H; ArH), 7.74-7.79 (m, 1H; ArH), 7.88-7.91 (m, 1H; ArH), 8.01-8.04 (m, 2H; ArH), 8.29 (dd, <sup>3</sup> $J$  = 8.1 Hz, <sup>4</sup> $J$  = 1.5 Hz, 1H; ArH), 10.75 (s, 1H); <sup>13</sup>C NMR (normal/DEPT-135) (CDCl<sub>3</sub>):  $\delta$  13.2.5 (+ve, CH<sub>3</sub>), 116.6 (+ve, CH), 118.2 (C), 118.7 (+ve, CH), 118.8 (+ve, CH), 123.6 (C), 124.9 (+ve, CH), 126.4 (+ve, CH), 126.5 (+ve, CH), 127.3 (C), 129.8 (+ve, CH), 134.5 (+ve, CH), 134.6 (+ve, CH), 136.6 (C), 139.2 (C), 151.5 (C), 156.0 (C), 162.5 (C), 164.1 (C), 175.3 (C); FAB mass  $m/z$  365 ( $M^+$ +1), 365:367 (3:1). (Found: C 66.13, H 3.73, N 7.70; C<sub>20</sub>H<sub>13</sub>ClN<sub>2</sub>O<sub>3</sub> requires C 65.85, H 3.59, N 7.68).

**(4Z)-1-(3-Chlorophenyl)-4-((6-isopropyl-4-oxo-4H-chromen-3-yl)methylene)-3-methyl-1H-pyrazol-5(4H)-one (10):** Orange solid, 85% yield, mp 190 °C;  $\nu_{\max}$  (KBr): 1705 (C=O). <sup>1</sup>H NMR (300 MHz, CDCl<sub>3</sub>):  $\delta$  = 1.30 (s, 3H; CH<sub>3</sub>), 1.31 (s, 3H; CH<sub>3</sub>), 2.38 (s, 3H; CH<sub>3</sub>), 3.00-3.10 (m, 1H; ArH), 7.11-7.15 (m, 1H; ArH), 7.31 (t,  $J$  = 8.1 Hz, 1H; ArH), 7.45 (d,  $J$  = 8.4 Hz, 1H; ArH), 7.61 (dd, <sup>3</sup> $J$  = 8.8 Hz, <sup>4</sup> $J$  = 2.4 Hz, 1H; ArH), 7.85-7.89 (m, 2H; ArH), 8.01-8.10 (m, 3H; ArH), 10.72 (s, 1H); <sup>13</sup>C NMR (normal/DEPT-135) (CDCl<sub>3</sub>):  $\delta$  13.2 (+ve, CH<sub>3</sub>), 23.8 (+ve, CH<sub>3</sub>), 33.8 (+ve, CH<sub>3</sub>), 116.6 (+ve, CH), 118.0 (+ve, CH), 118.5 (C), 118.8 (C), 123.3 (+ve,

CH), 124.8 (+ve, CH), 127.0 (C), 129.8 (+ve, CH), 133.5 (+ve, CH), 134.5 (C), 136.9 (+ve, CH), 139.2 (C), 147.5 (C), 151.6 (C), 154.4 (C), 162.5 (C), 164.1 (C), 175.4 (C). FAB mass  $m/z$  407 ( $M^+ + 1$ ); (Found: C 67.90, H 4.71, N 6.89;  $C_{23}H_{19}ClN_2O_3$  requires C 67.91, H 4.72, N 6.88).

**(4Z)-4-(((6-Bromo-4-oxo-4H-chromen-3-yl)methylene)-1-(3-chlorophenyl)-3-methyl-1H-pyrazol-5(4H)-one (11):**

Orange solid, 91% yield, mp 210 °C;  $\nu_{\max}$  (KBr): 1673, 1624 (C=O);  $^1H$  NMR (300 MHz,  $CDCl_3$ ):  $\delta$  = 2.32 (s, 3H;  $CH_3$ ), 7.07-7.10 (m, 1H; ArH), 7.23 (t,  $J$  = 8.1 Hz, 1H; ArH), 7.40 (d,  $J$  = 8.7 Hz, 1H; ArH), 7.74-7.82 (m, 2H; ArH), 7.87 (s, 1H; ArH), 7.95 (t,  $J$  = 2.1 Hz, 1H; ArH), 8.33 (d,  $J$  = 2.4 Hz, 1H; ArH), 10.66 (s, 1H); FAB mass  $m/z$  444 ( $M^+ + 1$ ). (Found: C 54.14, H 2.73, N 6.31;  $C_{20}H_{12}BrClN_2O_3$  requires C 54.15, H 2.72, N 6.31).

**(4Z)-1-(3-Chlorophenyl)-3-methyl-4-(((6-nitro-4-oxo-4H-chromen-3-yl)methylene)-1H-pyrazol-5(4H)-one (12):**

Orange solid, 87% yield, mp >240 °C;  $\nu_{\max}$  (KBr): 1684, 1662 (C=O).  $^1H$  NMR (300 MHz,  $CDCl_3$ ):  $\delta$  = 2.34 (s, 3H;  $CH_3$ ), 7.09-7.13 (m, 1H; ArH), 7.27 (t,  $J$  = 8.4 Hz, 1H; ArH), 7.68 (d,  $J$  = 9.3 Hz, 1H; ArH), 7.79-7.82 (m, 1H; ArH), 7.85 (d,  $J$  = 0.6 Hz, 1H; ArH), 7.95 (t,  $J$  = 2.1 Hz, 1H; ArH), 8.51 (dd,  $^3J$  = 9 Hz,  $^4J$  = 2.7 Hz, 1H; ArH), 9.08 (d,  $J$  = 2.4 Hz, 1H; ArH), 10.71 (s, 1H); FAB mass  $m/z$  410 ( $M^+ + 1$ ); (Found: C 58.62, H 2.95, N 10.25;  $C_{20}H_{12}ClN_3O_5$  requires C 58.63, H 2.95, N 10.24).

**(4Z)-1-(3-Chlorophenyl)-4-(((6-fluoro-8-nitro-4-oxo-4H-chromen-3-yl)methylene)-3-methyl-1H-pyrazol-5(4H)-one (13):**

Orange solid, 89% yield, mp 230 °C;  $\nu_{\max}$  (KBr): 1730, 1653 (C=O).  $^1H$  NMR (300 MHz,  $CDCl_3$ ):  $\delta$  = 2.33 (s, 3H;  $CH_3$ ), 7.09-7.13 (m, 1H; ArH), 7.27 (t,  $J$  = 8.4 Hz, 1H; ArH), 7.78-7.83 (m, 2H; ArH), 7.94 (t,  $J$  = 2.1 Hz, 1H; ArH), 8.08 (dd,  $^3J$  = 7 Hz,  $^4J$  = 3 Hz, 1H; ArH), 8.18 (dd,  $^3J$  = 7.2 Hz,  $^4J$  = 3 Hz, 1H; ArH), 10.73 (s, 1H); FAB mass  $m/z$  427 ( $M^+ + 1$ ); (Found: C 56.15, H 2.59, N 9.82;  $C_{20}H_{12}ClFN_3O_5$  requires C 56.16, H 2.60, N 9.83).

**3-(1,3-Dimethyl-2,4,6-trioxo-tetrahydro-pyrimidin-5-ylidenemethyl)-4-oxo-chroman-2-carbonitrile+3-(1,3-Dimethyl-2,4,6-trioxo-tetrahydro-pyrimidin-5-ylidenemethyl)-4-hydroxy-2H-chromene-2-carbonitrile (14):**

Yellow solid, 75% yield, mp >240 °C;  $\nu_{\max}$  (KBr): 2177 (C $\equiv$ N), 1638, 1568 (C=O).  $^1H$  NMR (300 MHz,  $MeOH-d_6 + CDCl_3$ ):  $\delta$  = 3.18 (s, 3H; 2 $\times$  $CH_3$ ), 5.58 (s, 1H; CH), 6.93 (d,  $J$  = 8.4 Hz, 1H; ArH), 7.04 (t,  $J$  = 7.2 Hz, 1H; ArH), 7.30-7.41 (m, 4H; ArH), 7.61 (t,  $J$  = 7.5 Hz, 1H; ArH),

7.84 (d,  $J = 7.8$  Hz, 1H; ArH), 8.01 (d,  $J = 7.8$  Hz, 1H; =H), 8.46 (s, 1H; ArH);  $^{13}\text{C}$  NMR (normal/DEPT-135) ( $\text{MeOH-d}_4 + \text{CDCl}_3$ ):  $\delta$  23.6 (+ve,  $\text{CH}_3$ ), 27.5 (+ve,  $\text{CH}_3$ ), 27.9 (+ve,  $\text{CH}_3$ ), 67.9 (+ve, CH), 81.9 (+ve, CH), 113.3 ( $\text{C}\equiv\text{N}$ ), 117.9 (C), 118.4 (C), 119.0 (+ve, CH), 119.5 (+ve, CH), 120.5 (C), 122.9 (C), 123.4 (+ve, CH), 125.5 (+ve, CH), 127.5 (+ve, CH), 134.2 (C), 134.9 (C), 141.8 (+ve, CH), 153.6 (C), 156.5 (C), 156.5 (C), 156.7 (C), 157.8 (+ve, CH), 163.2 (C), 164.4 (C), 177.0 (C). FAB mass  $m/z$  340 ( $\text{M}+1$ ); (Found: C 60.18, H 3.86, N 12.38;  $\text{C}_{17}\text{H}_{13}\text{N}_3\text{O}_5$  requires C 60.16, H 3.87, N 12.37).

**<sup>1</sup>H NMR**

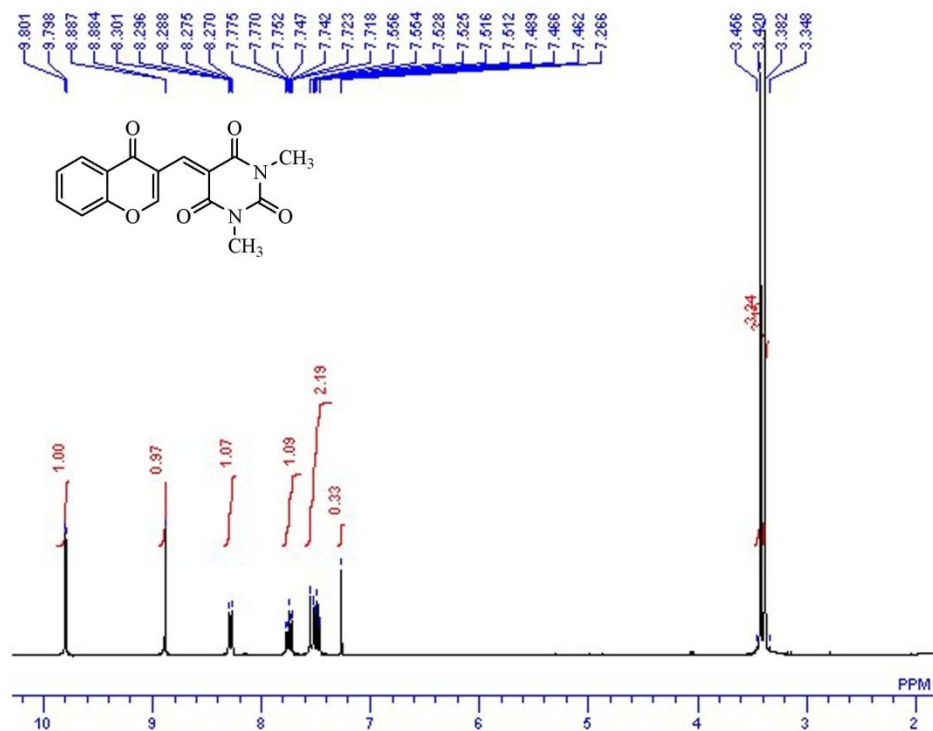

**SI Figure 1.** <sup>1</sup>H NMR spectrum of compound 3.

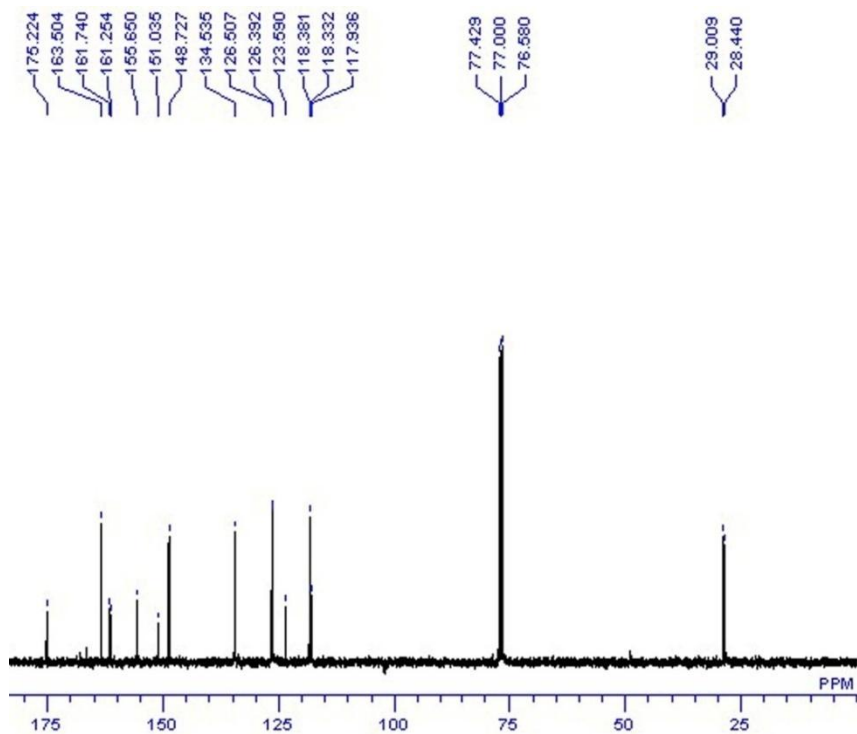

**SI Figure 2.** <sup>13</sup>C NMR spectrum of compound 3 (CDCl<sub>3</sub>).

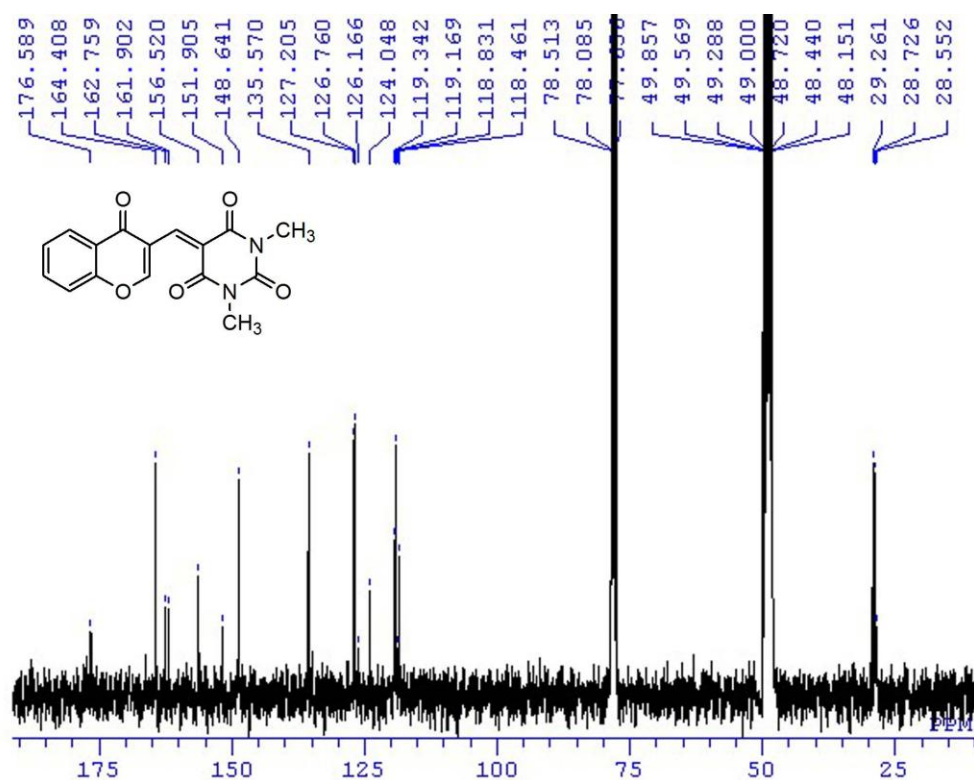

**SI Figure 3.** <sup>13</sup>C NMR spectrum of compound **3** in (MeOH-d<sub>4</sub>+CDCl<sub>3</sub>). Two tautomers were observed in MeOH.

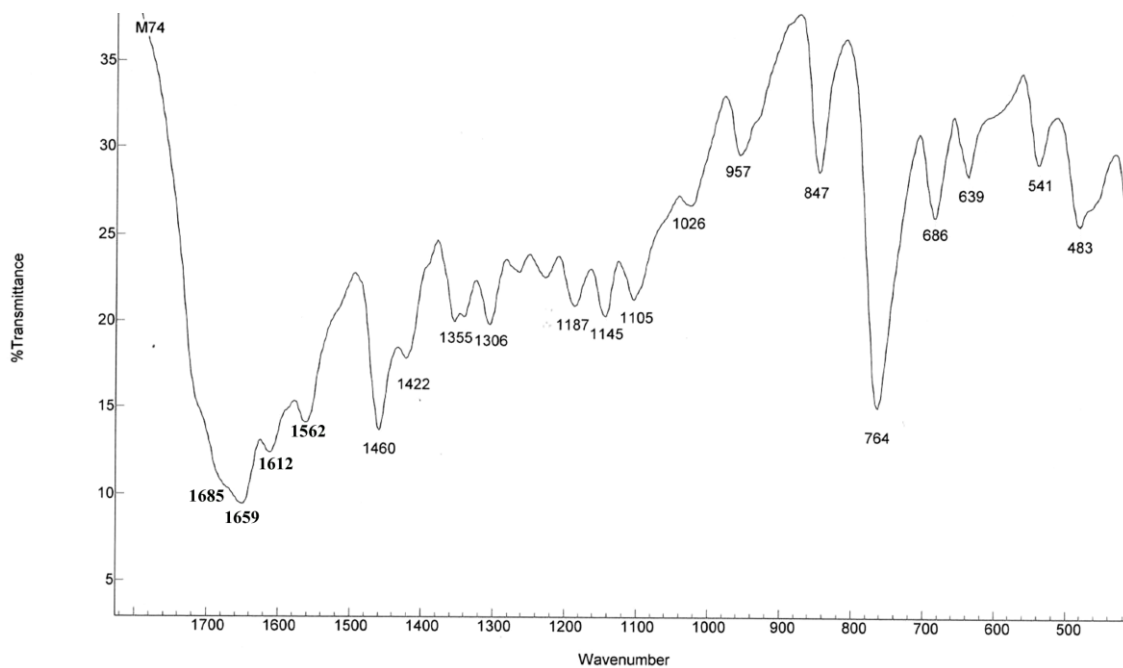

**SI Figure 4.** IR spectrum of compound **3**.

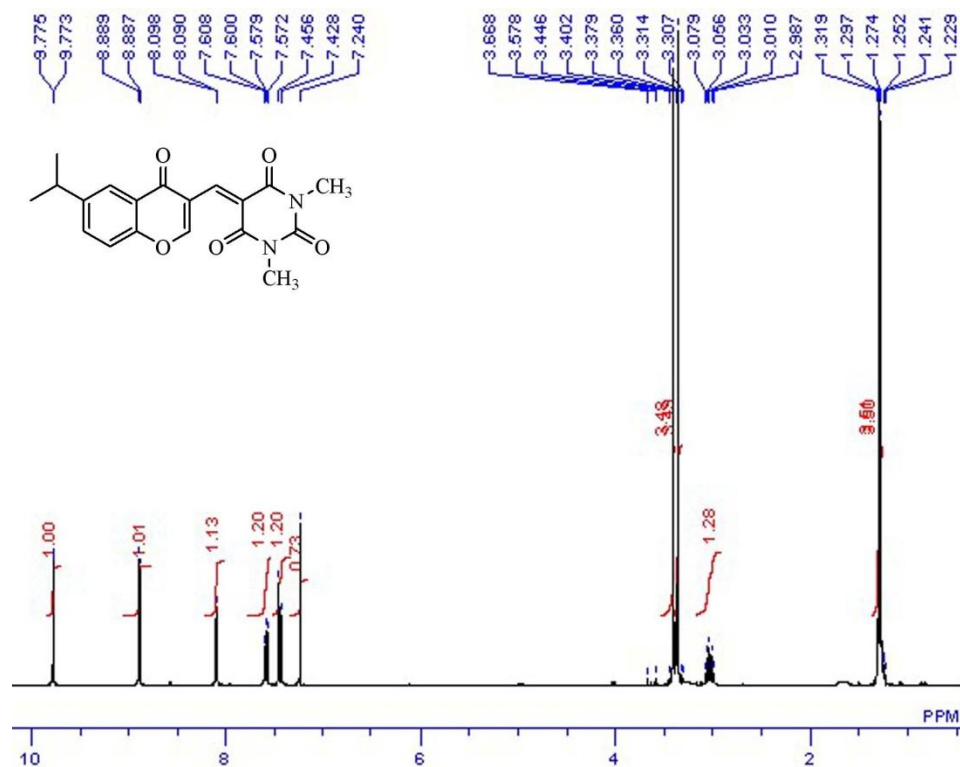

**SI Figure 5.** <sup>13</sup>C NMR spectrum of compound **4**.

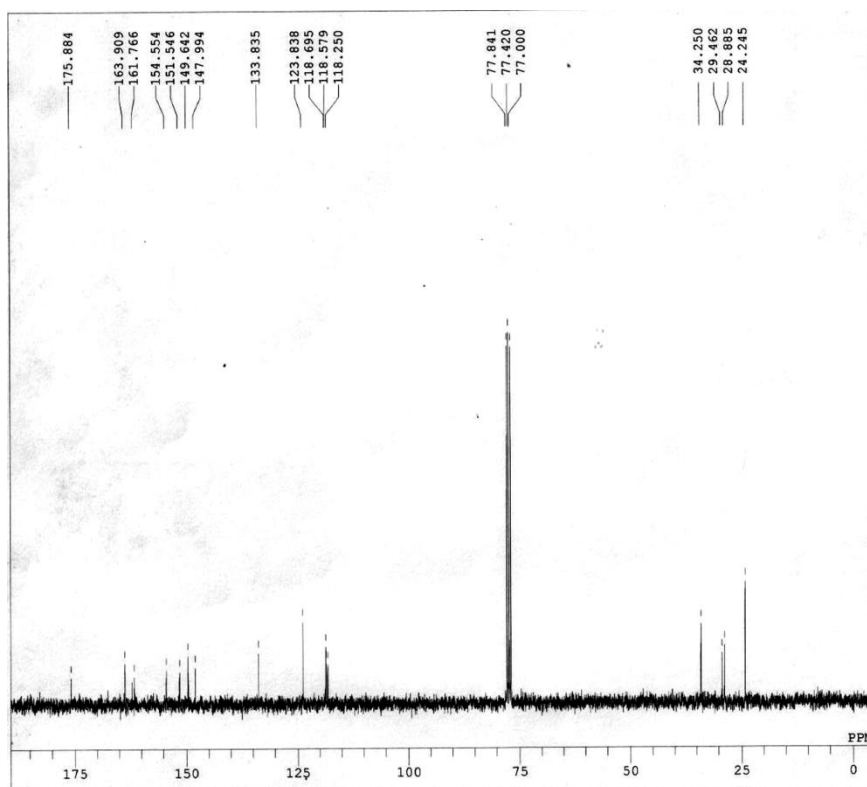

**SI Figure 6.**  $^{13}\text{C}$  NMR spectrum of compound 4.

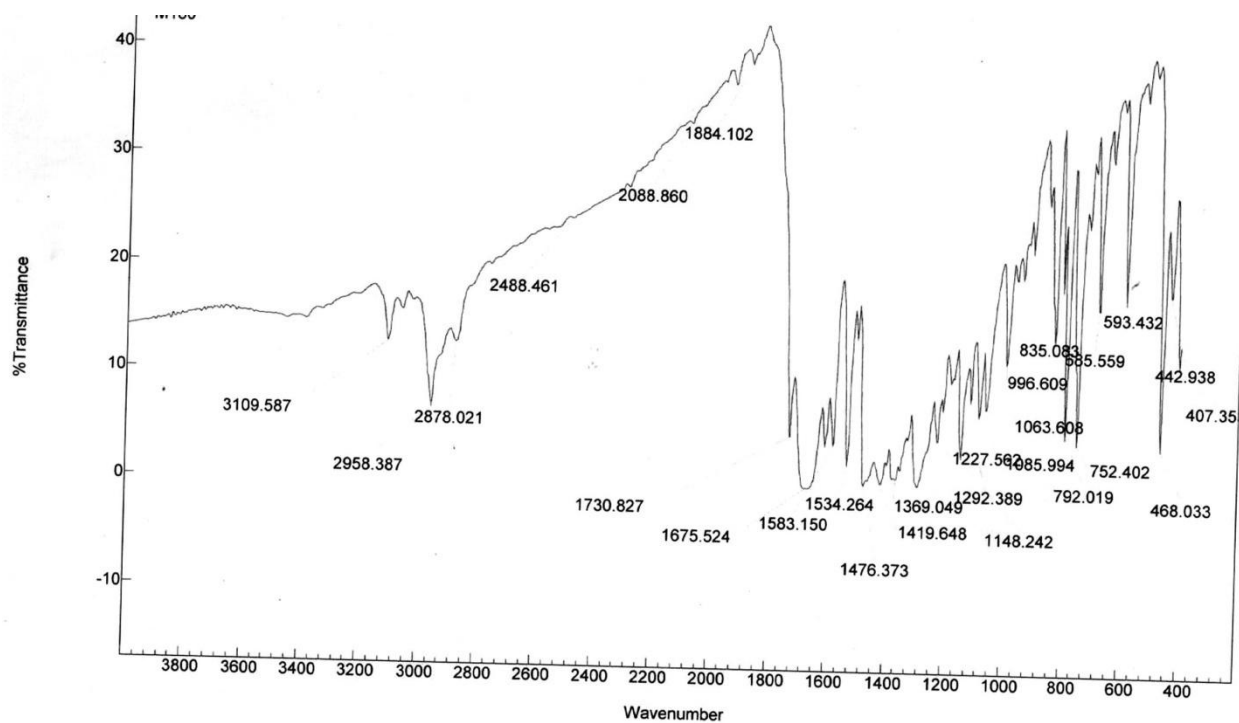

**SI Figure 7.** IR spectrum of compound 4.

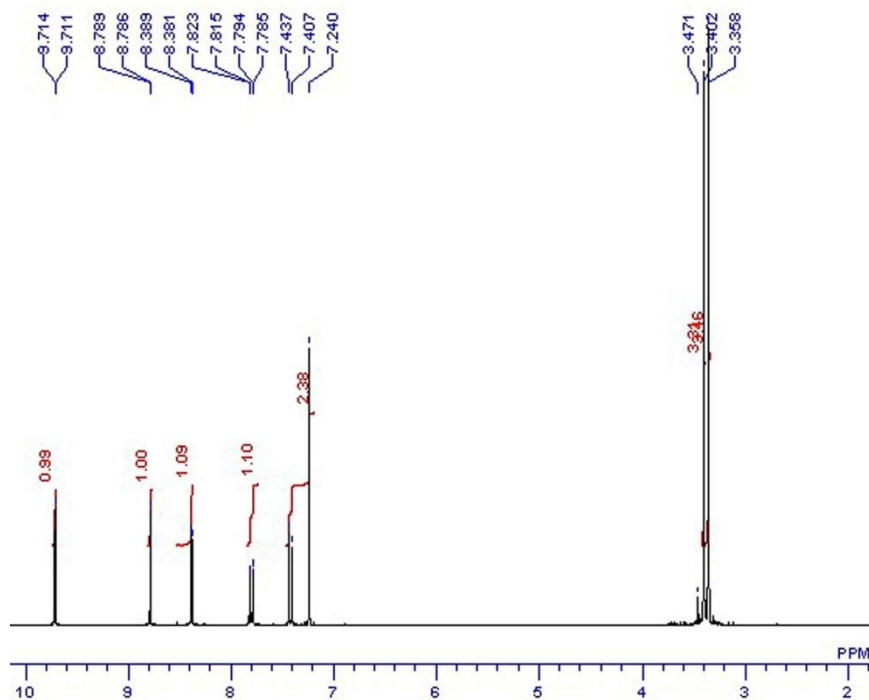

**SI Figure 8.**  $^1\text{H}$  NMR spectrum of compound 5.

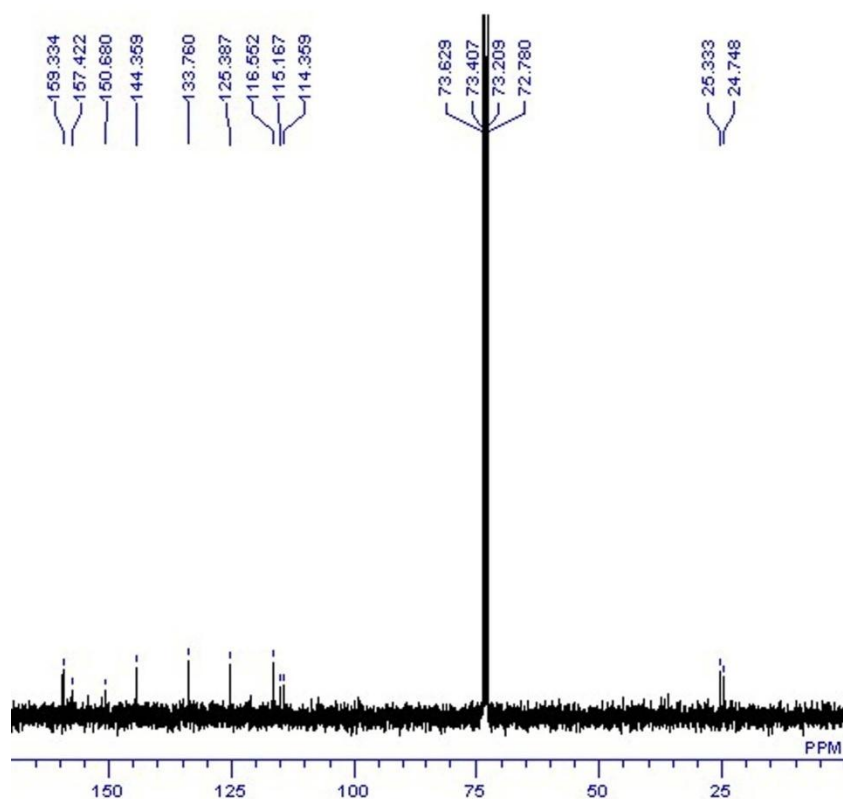

**SI Figure 9.** <sup>13</sup>C NMR spectrum of compound **5**.

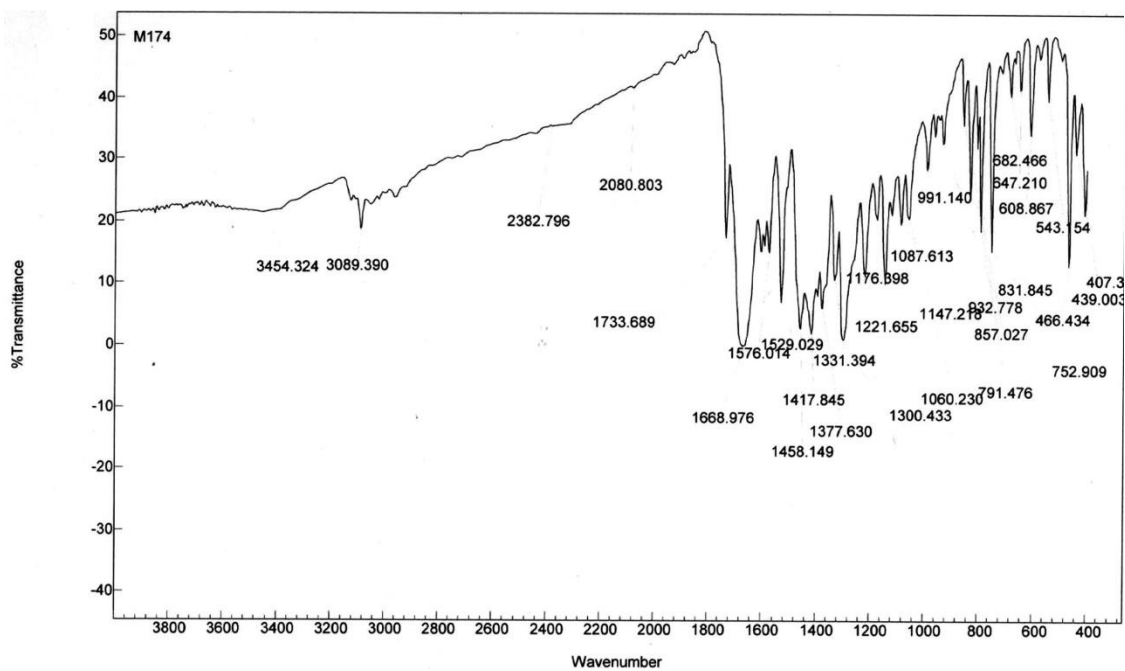

**SI Figure 10.** IR spectrum of compound **5**.

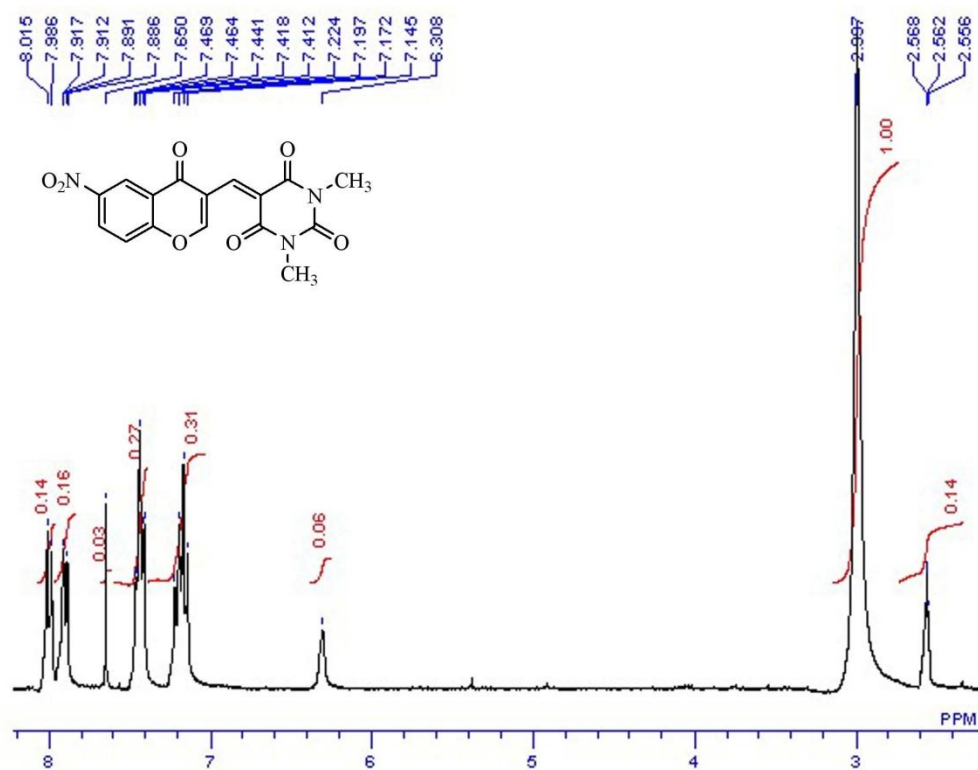

SI Figure 11. <sup>1</sup>H NMR spectrum of compound 6.

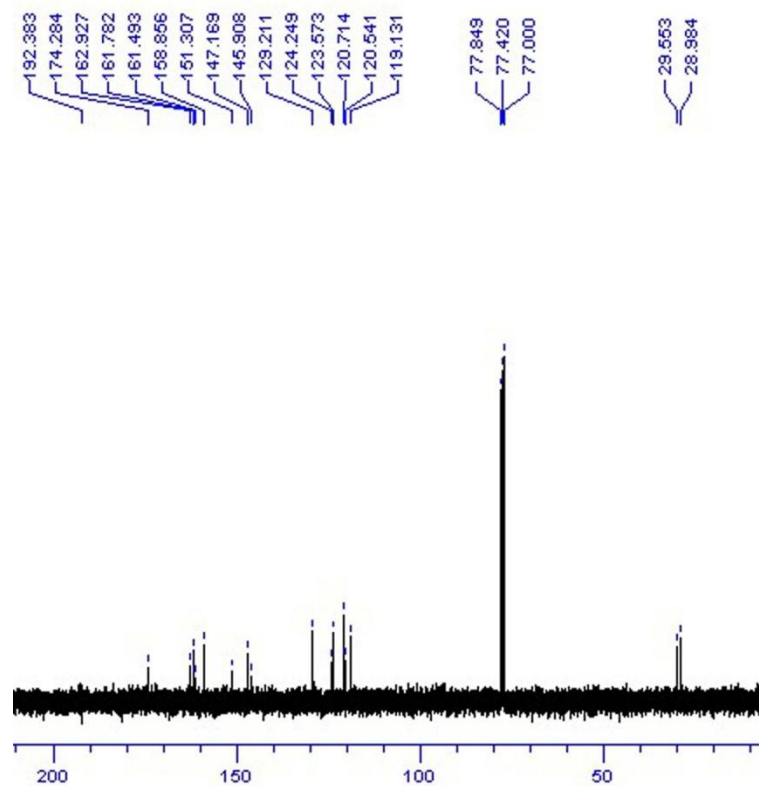

**SI Figure 12.**  $^{13}\text{C}$  NMR spectrum of compound 6.

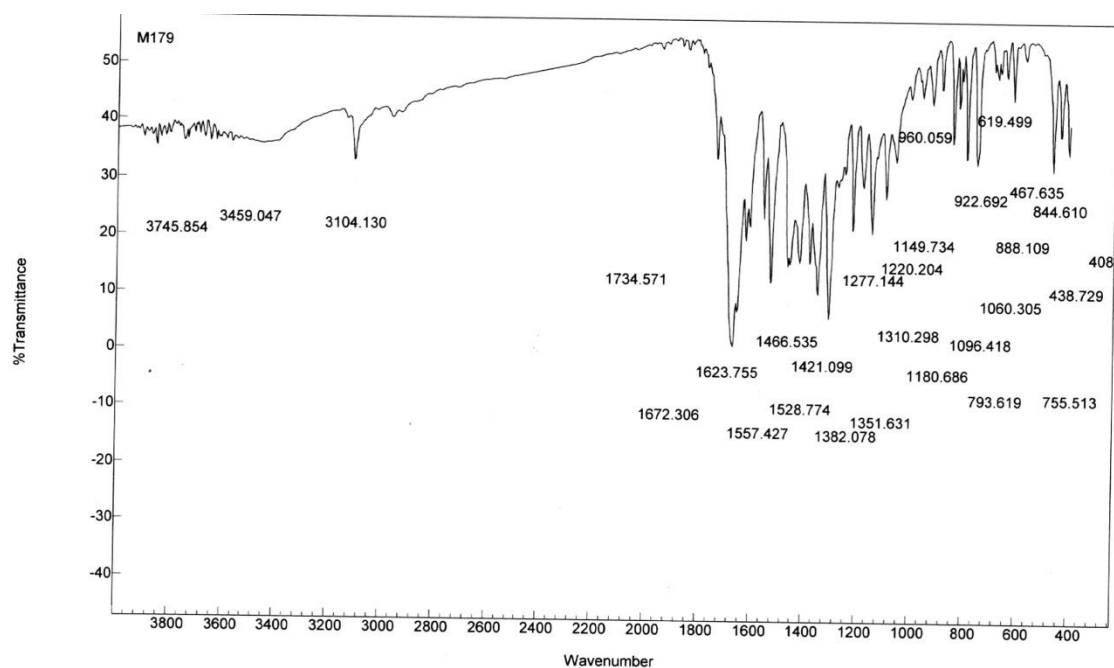

**SI Figure 13.** IR spectrum of compound 6.

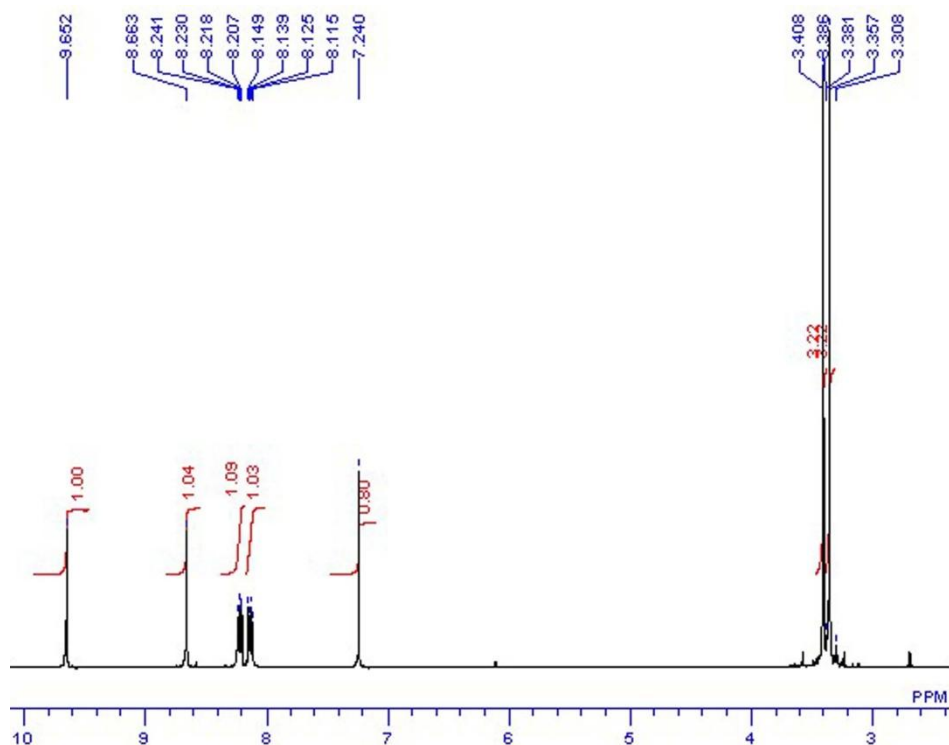

**SI Figure 14.**  $^1\text{H}$  NMR spectrum of compound 7.

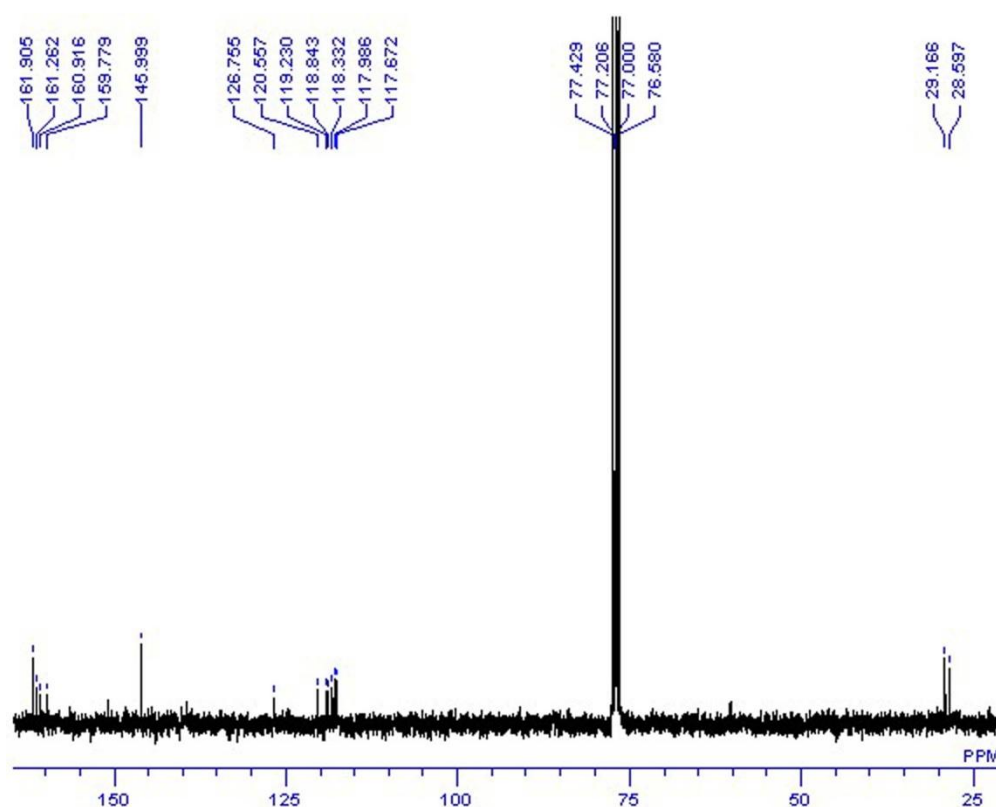

SI Figure 15.  $^{13}\text{C}$  NMR spectrum of compound 7.

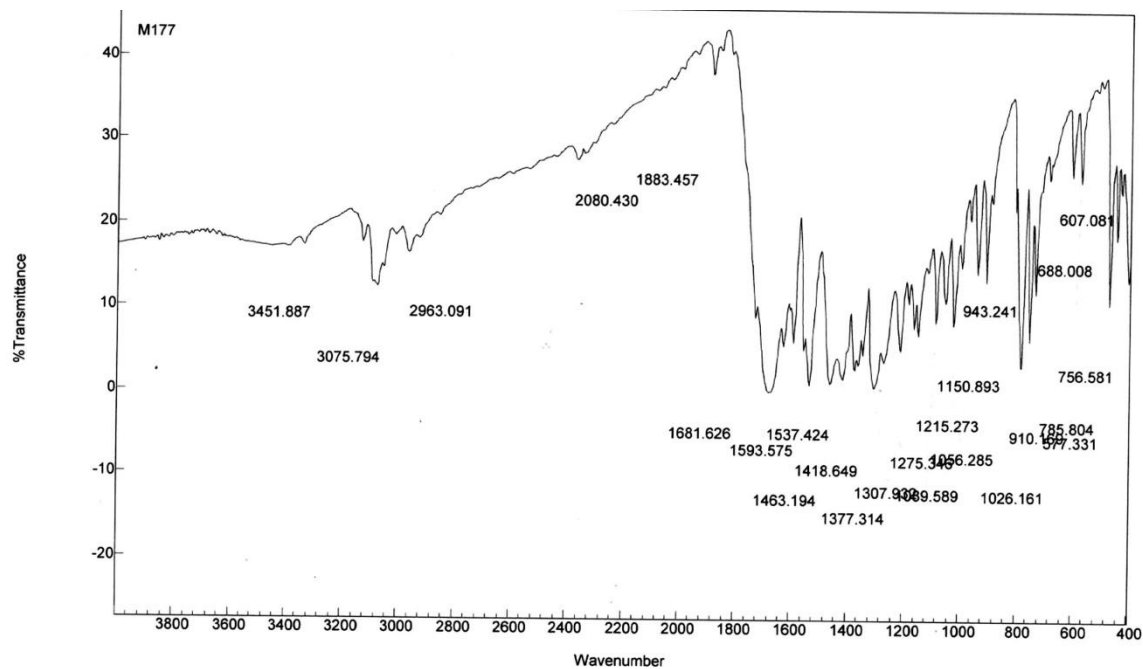

SI Figure 16. IR spectrum of compound 7.

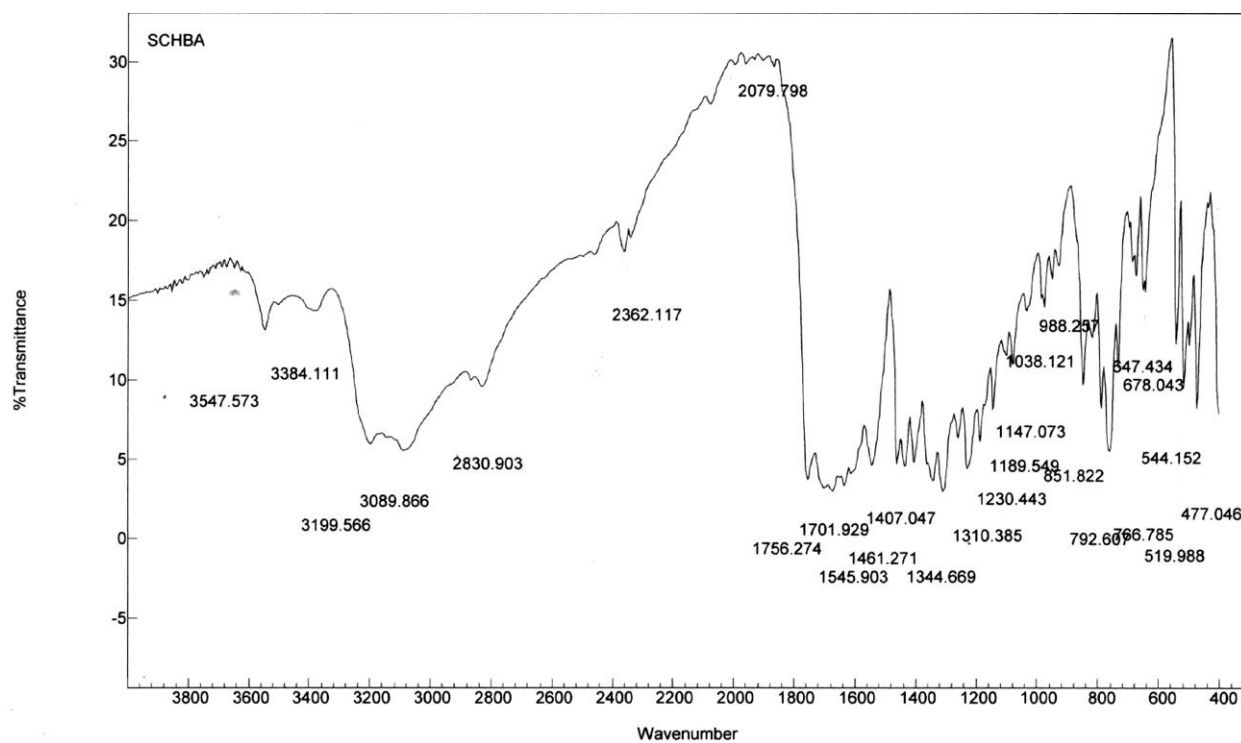

SI Figure 17. IR spectrum of compound 8.

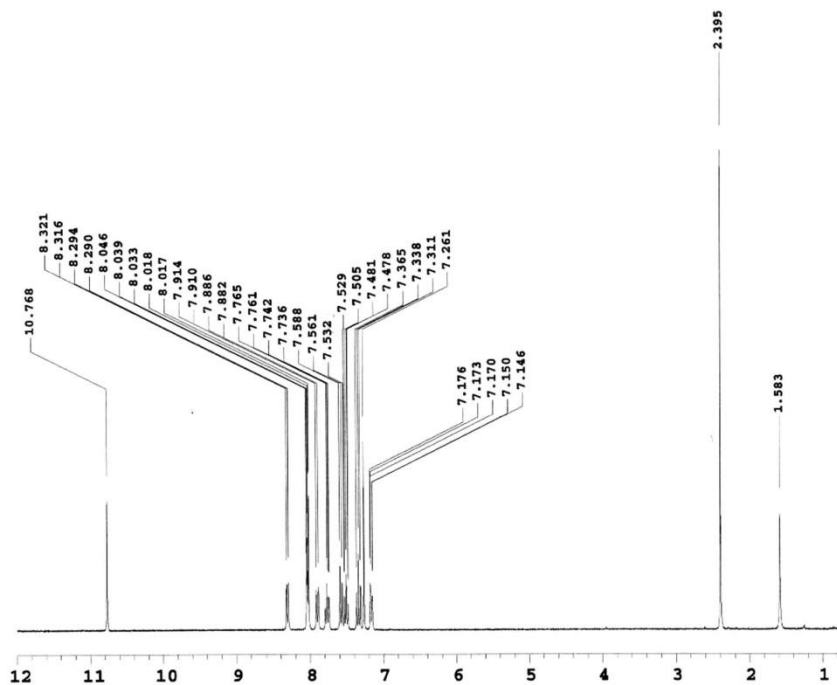

SI Figure 18. <sup>1</sup>H NMR spectrum of compound 9.

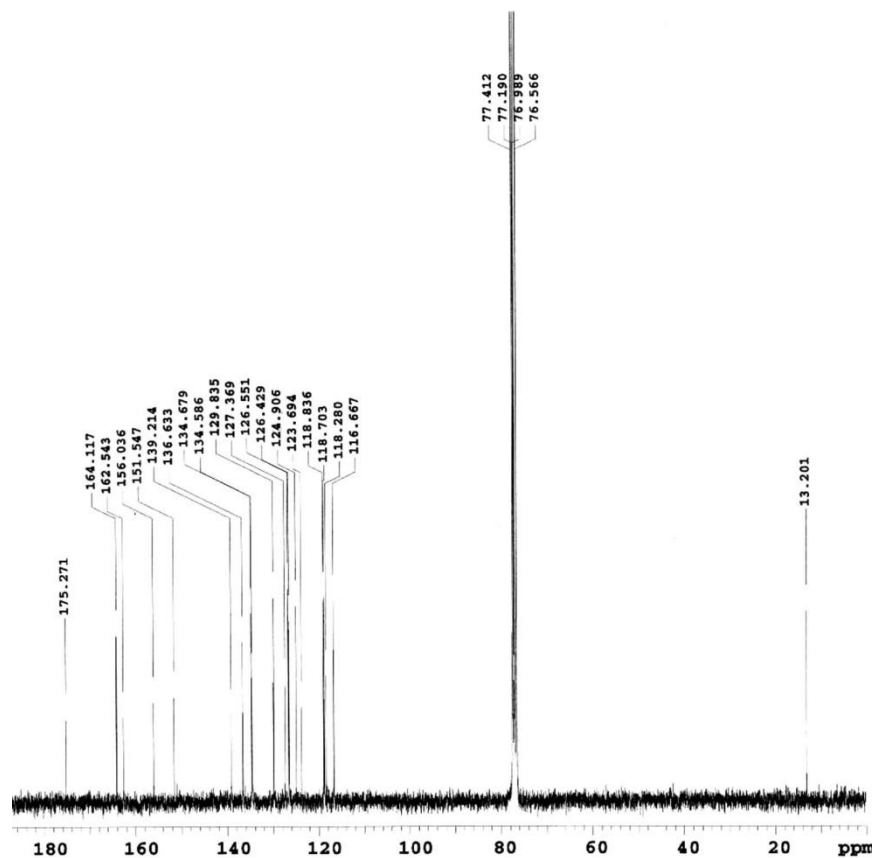

SI Figure 19. <sup>13</sup>C NMR spectrum of compound 9.

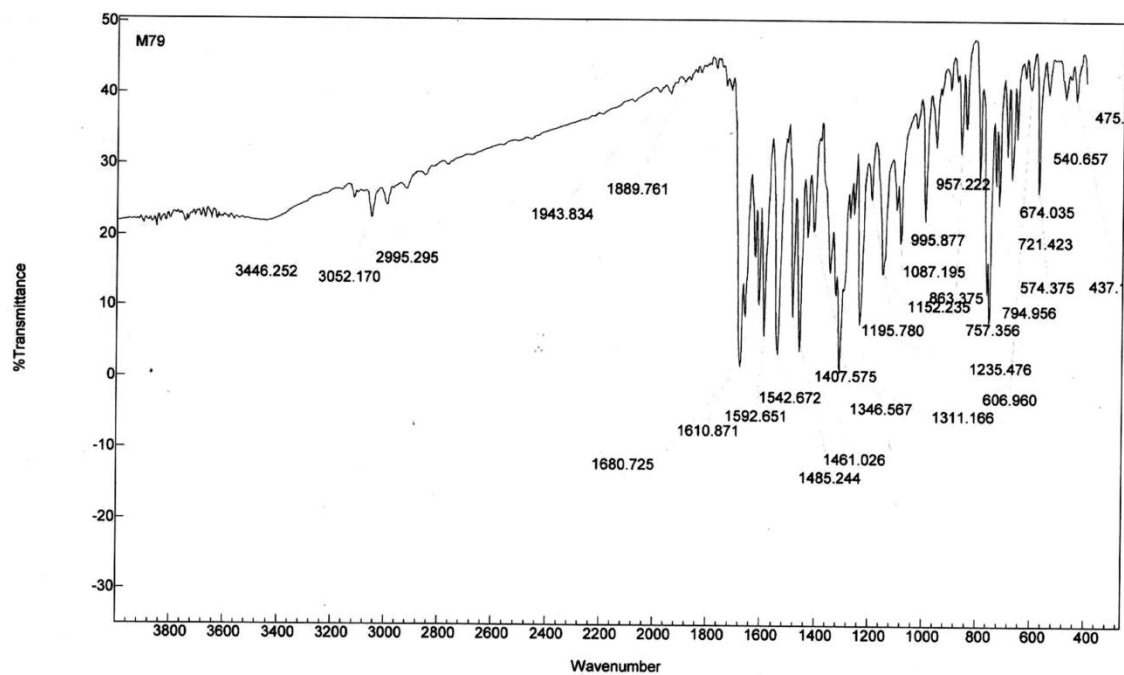

SI Figure 20. IR spectrum of compound 9.

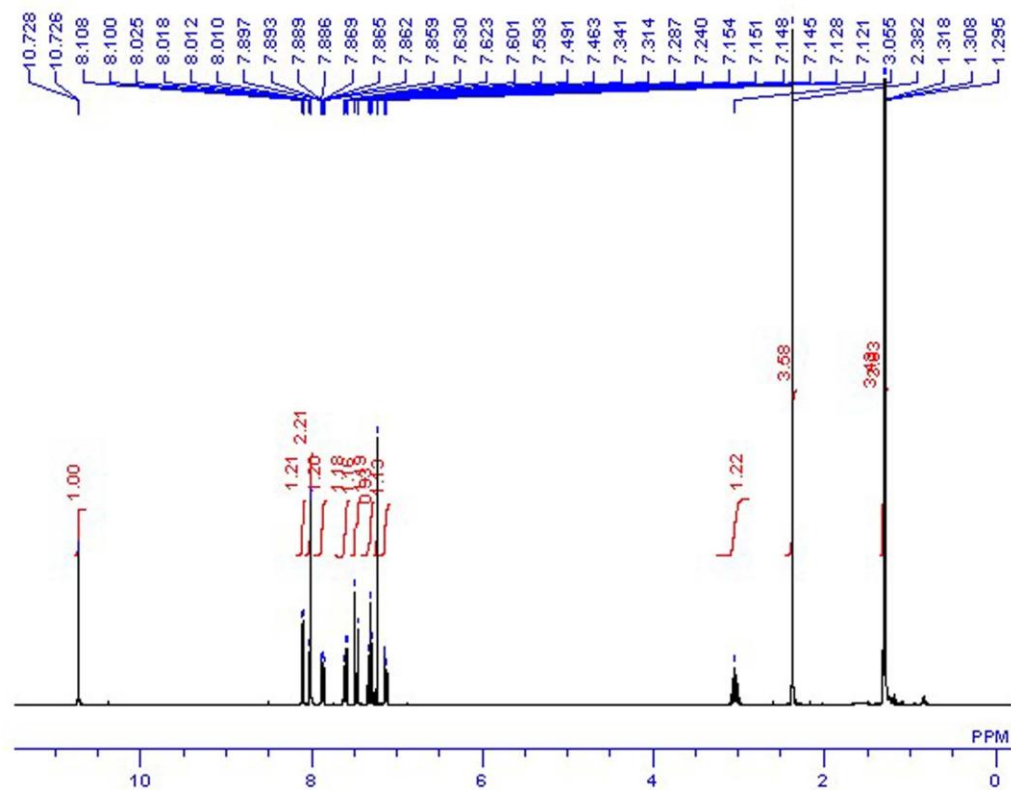

SI Figure 21.  $^1\text{H}$  NMR spectrum of compound 10.

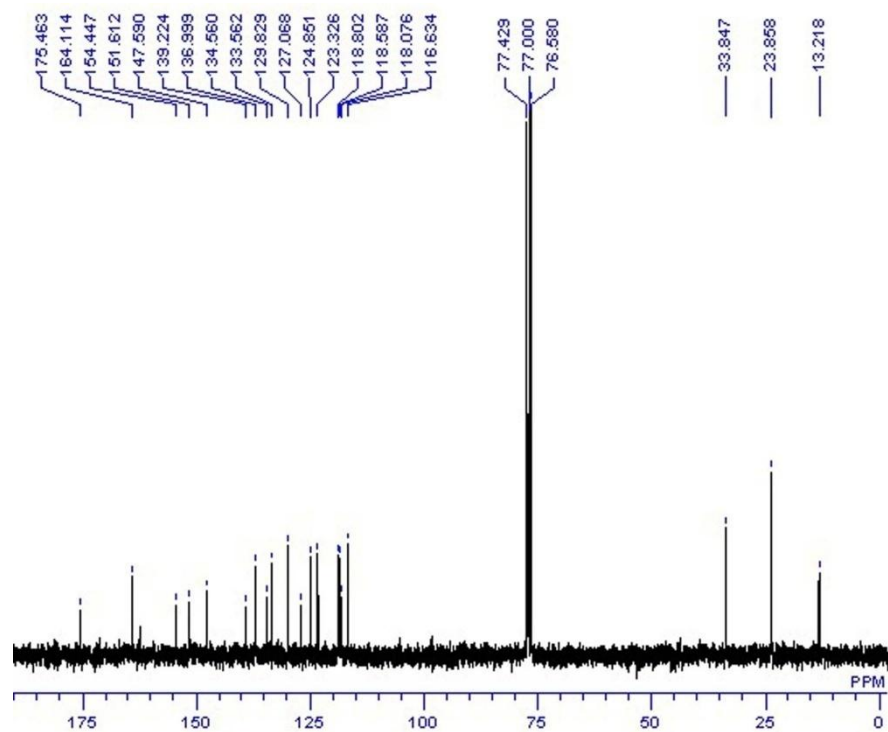

SI Figure 22.  $^{13}\text{C}$  NMR spectrum of compound 10.

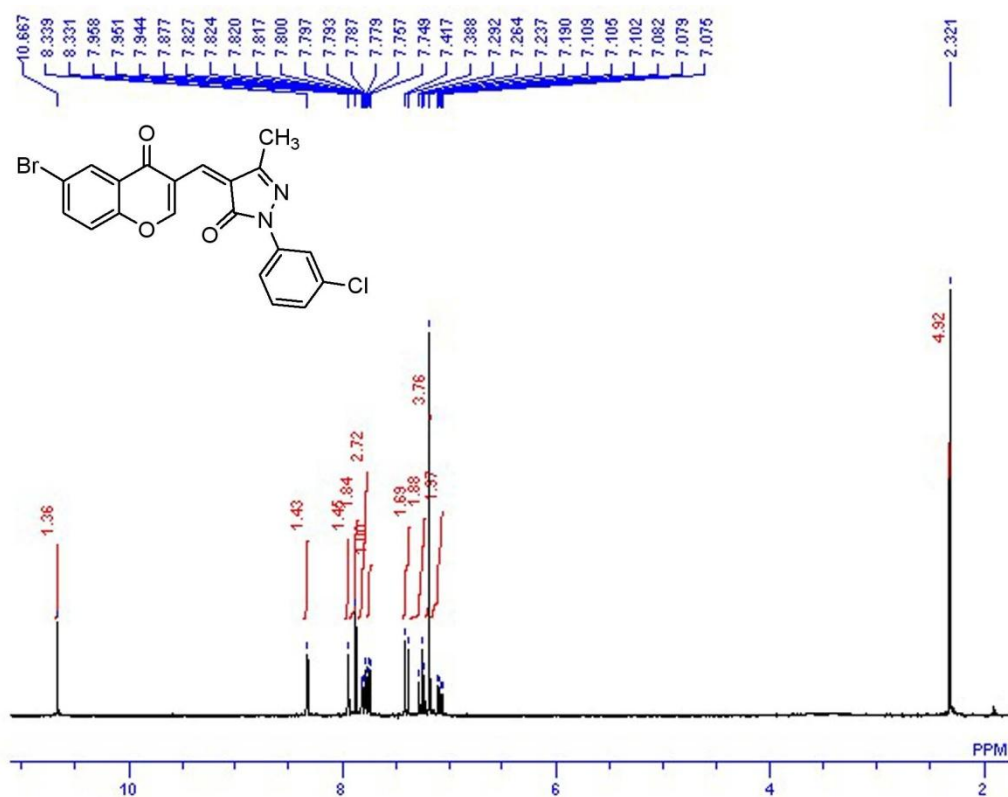

SI Figure 23. <sup>1</sup>H NMR spectrum of compound 11.

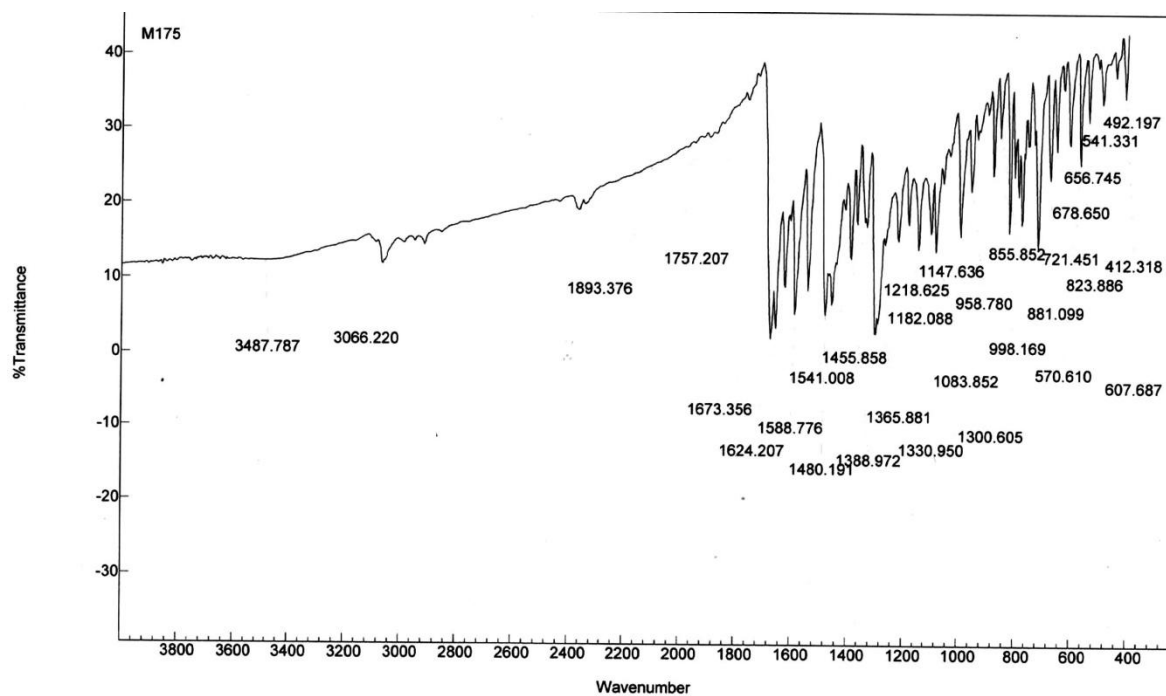

SI Figure 24. IR spectrum of compound 11.

IR Spectrum (Wavenumber vs % Transmittance) for compound 10. The x-axis represents Wavenumber (cm⁻¹) from 3800 to 400, and the y-axis represents % Transmittance from 0 to 50. The spectrum shows characteristic absorption bands for an aldehyde, including a strong C=O stretch at 1684.338 cm⁻¹ and C-H stretches around 3000 cm⁻¹.

| Wavenumber (cm⁻¹) |
|-------------------|
| 3446.500          |
| 3096.278          |
| 2598.631          |
| 1684.338          |
| 1662.484          |
| 1589.992          |
| 1528.439          |
| 1482.150          |
| 1400.059          |
| 1344.429          |
| 1292.029          |
| 1222.950          |
| 1150.804          |
| 1003.139          |
| 890.569           |
| 829.099           |
| 786.431           |
| 725.525           |
| 656.872           |
| 630.963           |
| 683.565           |
| 572.853           |
| 441.004           |

S20

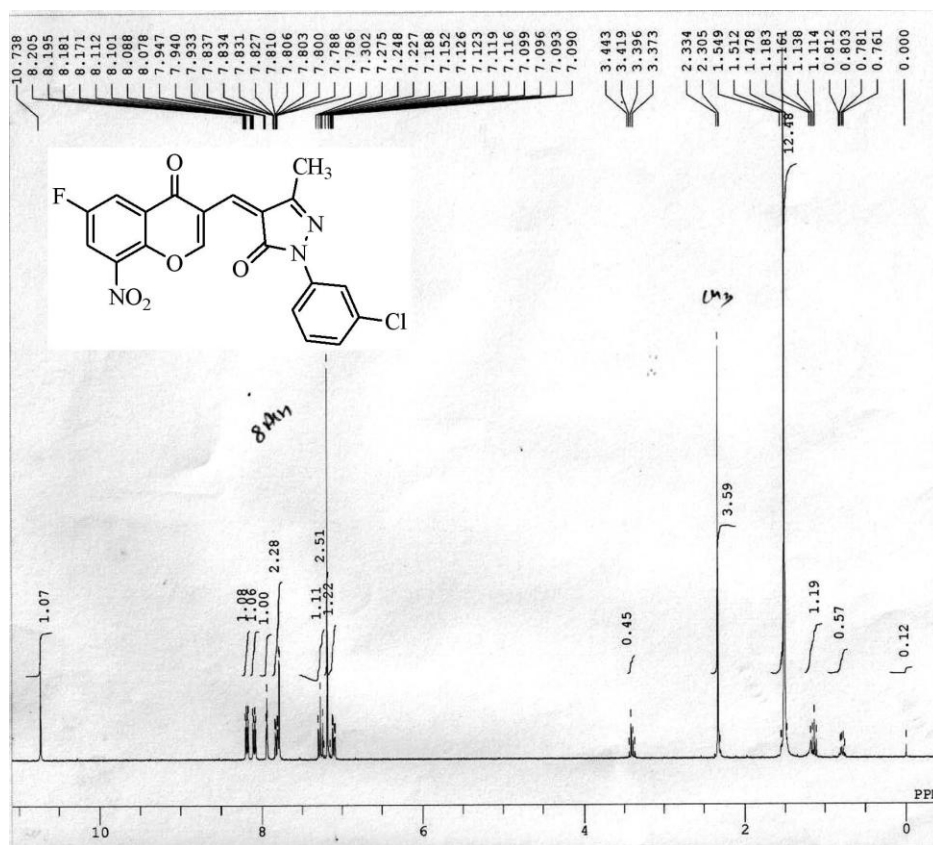

SI Figure 27. <sup>1</sup>H NMR spectrum of compound 13.

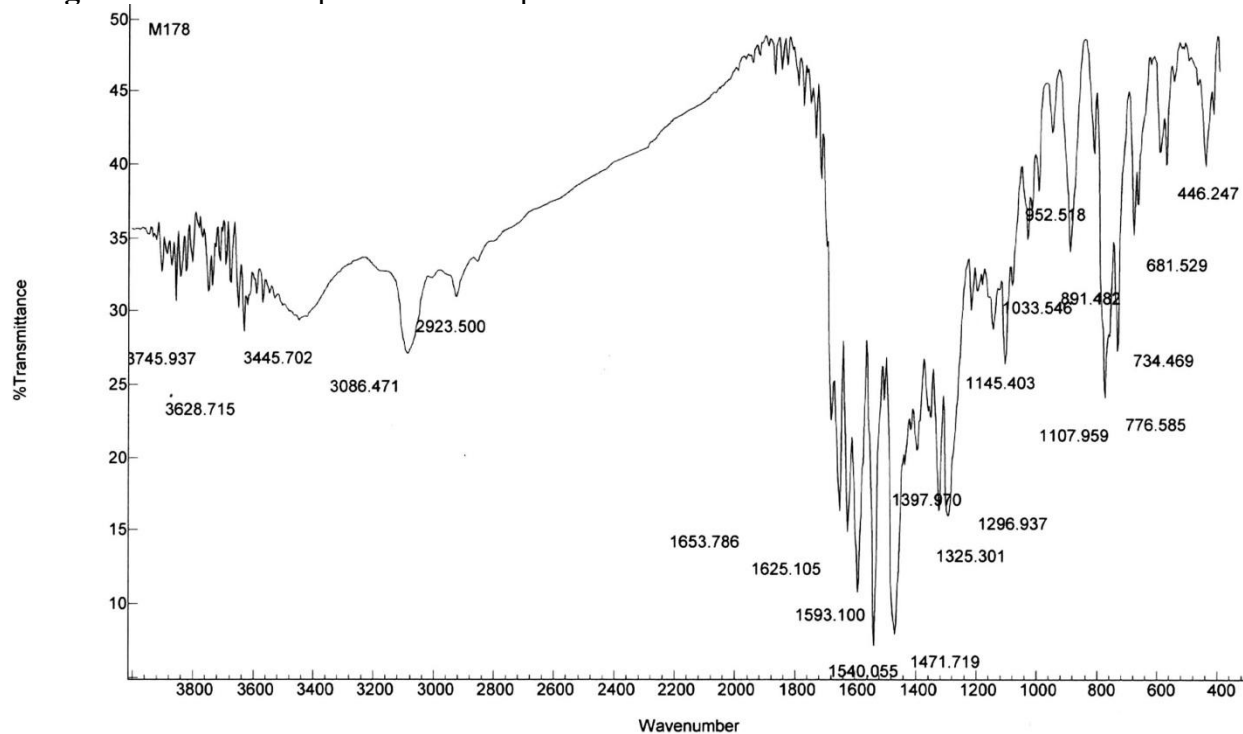

SI Figure 28. IR spectrum of compound 13.

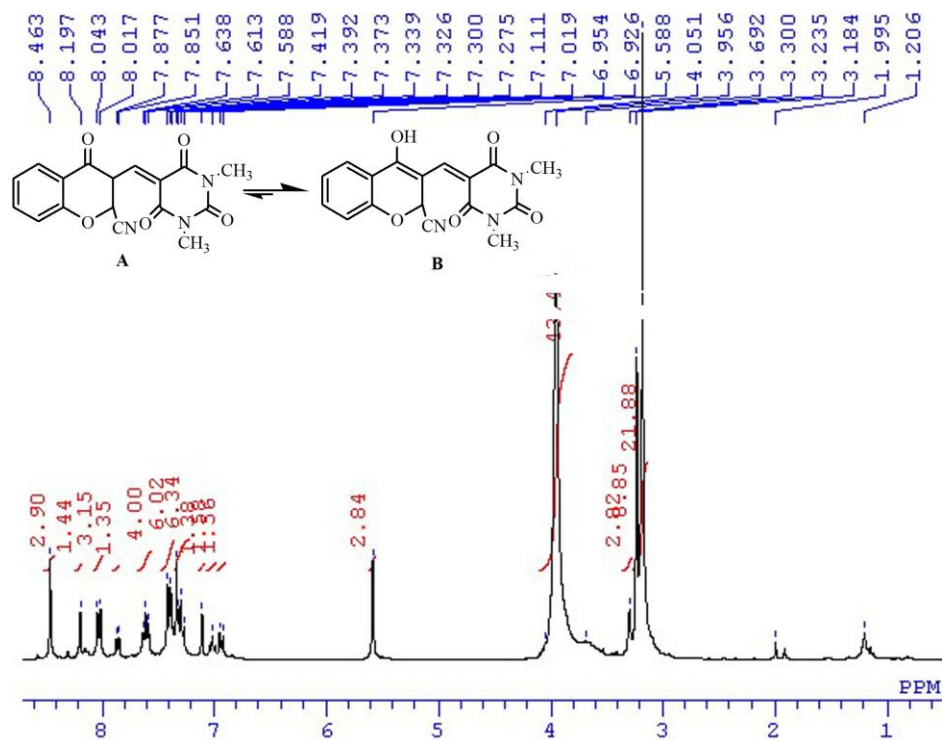

**SI Figure 29.**  $^1\text{H}$  NMR spectrum of compound **14** ( $\text{MeOH-d}_4+\text{CDCl}_3$ ). Two tautomers were observed in MeOH. Tautomer 'B' is major.

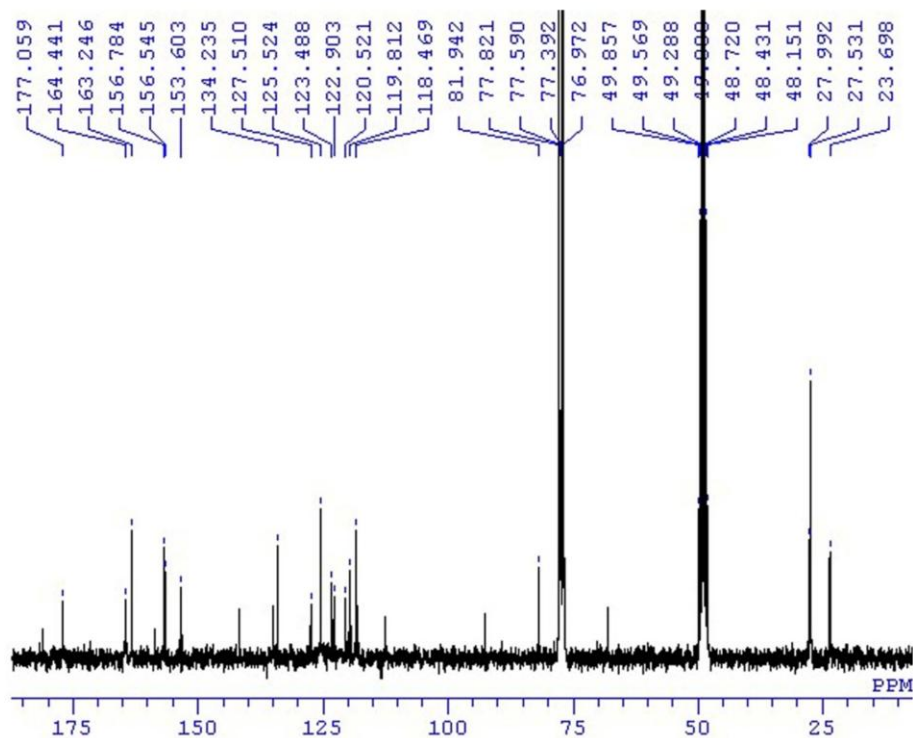

**SI Figure 30.**  $^{13}\text{C}$  NMR spectrum of compound **14** ( $\text{MeOH-d}_4+\text{CDCl}_3$ ).

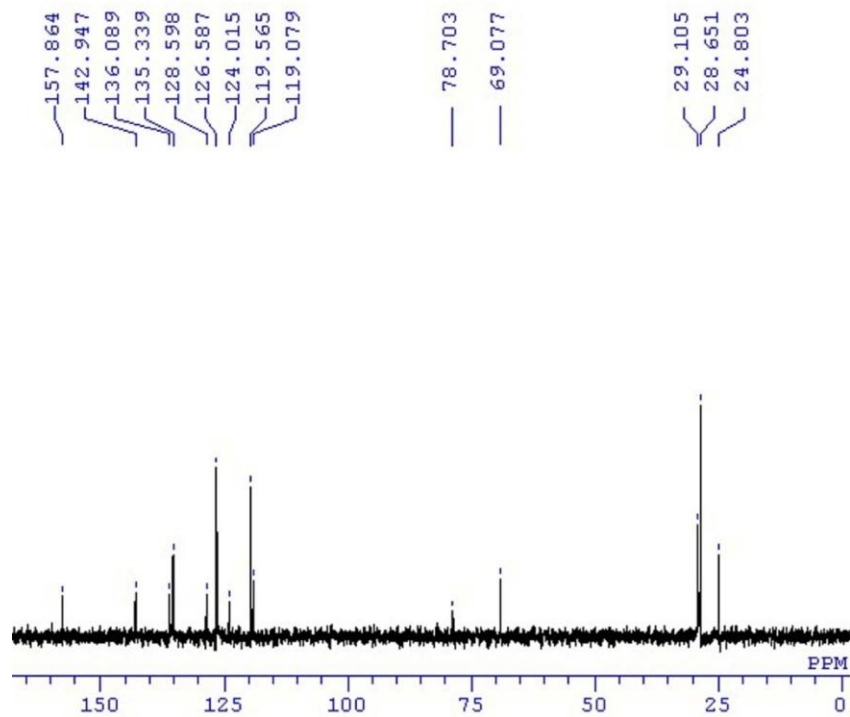

**SI Figure 31.** DEPT-135 NMR spectrum of compound **14**.

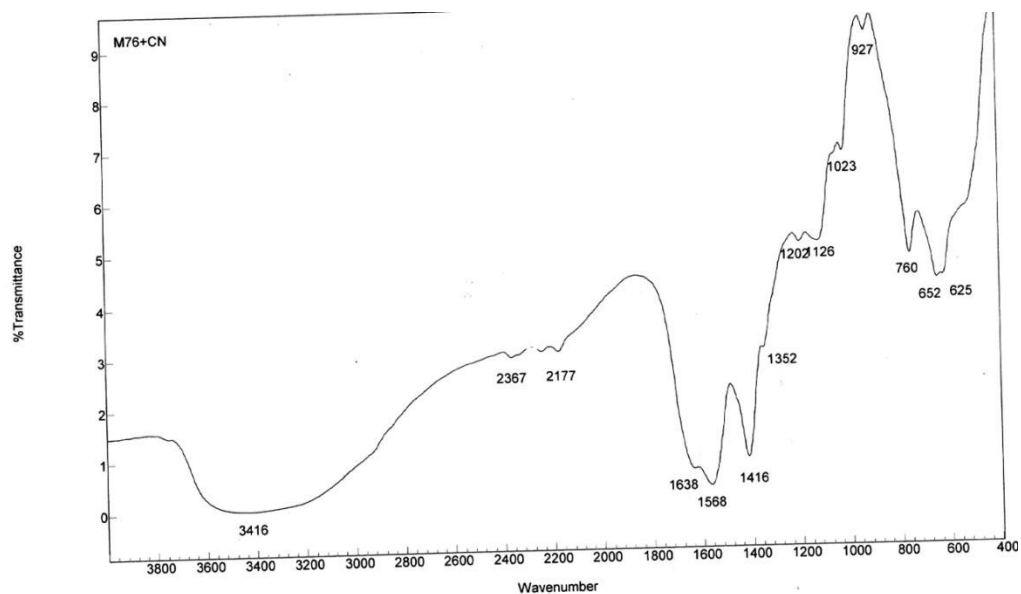

**SI Figure 32.** IR spectrum of compound **14**.

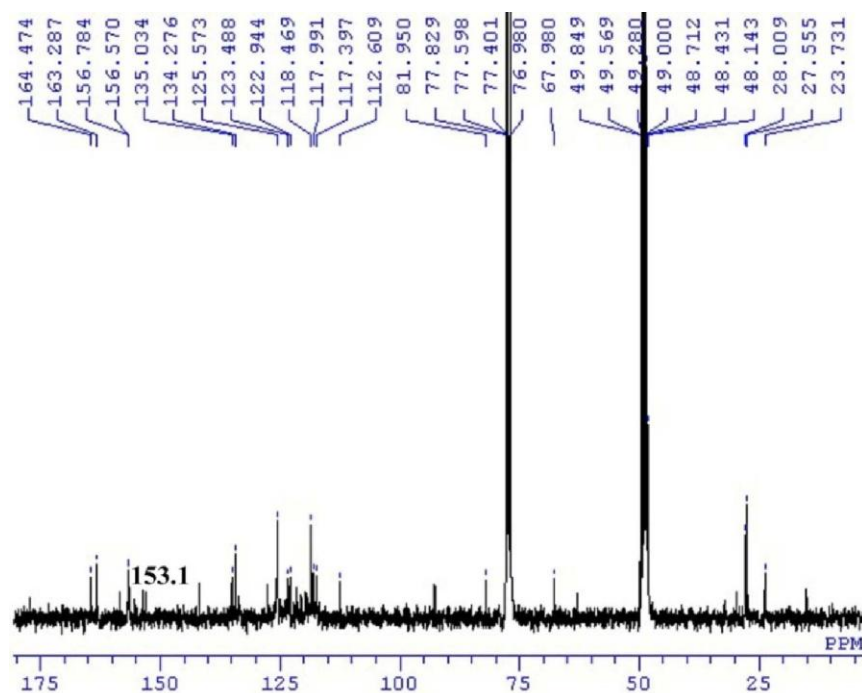

**SI Figure 33.** <sup>13</sup>C NMR spectrum of compound **3**+Hg(ClO<sub>4</sub>)<sub>2</sub> in MeOH-d<sub>4</sub>+CDCl<sub>3</sub>.

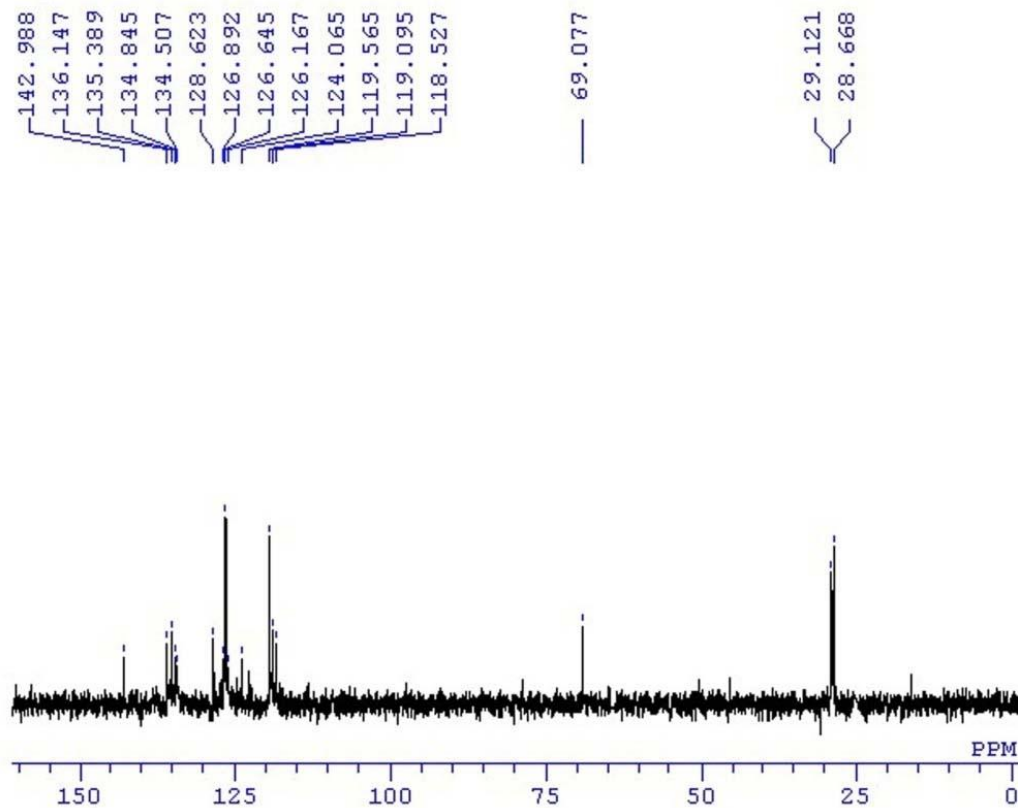

**SI Figure 34.** DEPT-135 NMR spectrum of compound **3**+Hg(ClO<sub>4</sub>)<sub>2</sub> in MeOH-d<sub>4</sub>+CDCl<sub>3</sub>.

### UV-vis titrations

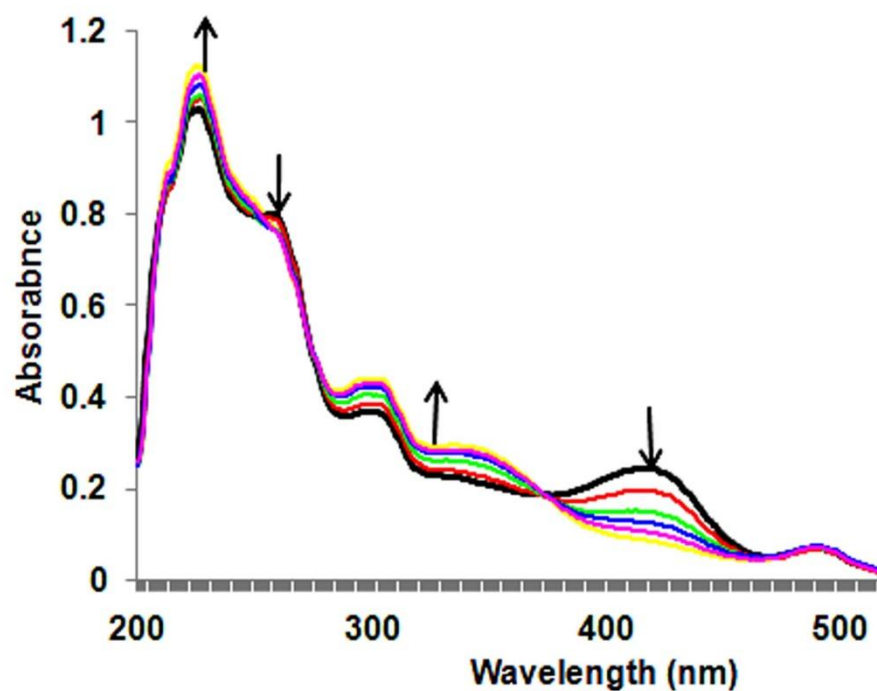

**SI Figure 35.** UV-vis spectra of compound **3** (5  $\mu\text{M}$ ) in water-ethanol (pH 7.2, v/v 9:1) upon addition of increasing amount of  $\text{Hg}(\text{ClO}_4)_2$  (0.1-1 equiv).

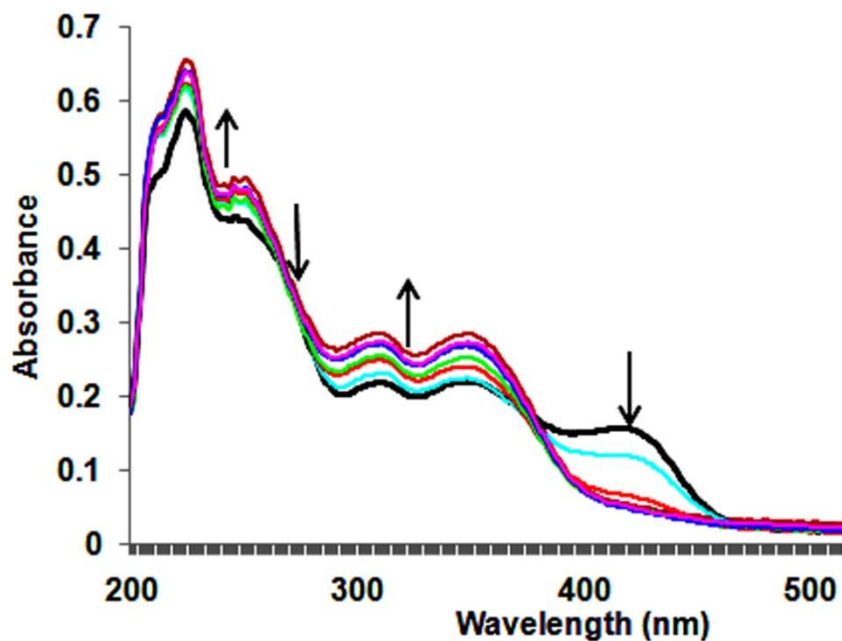

**SI Figure 36.** UV-vis spectra of compound **4** (5  $\mu\text{M}$ ) in water-ethanol (pH 7.2, v/v 9:1) upon addition of increasing amount of  $\text{Hg}(\text{ClO}_4)_2$  (0.1-1 equiv).

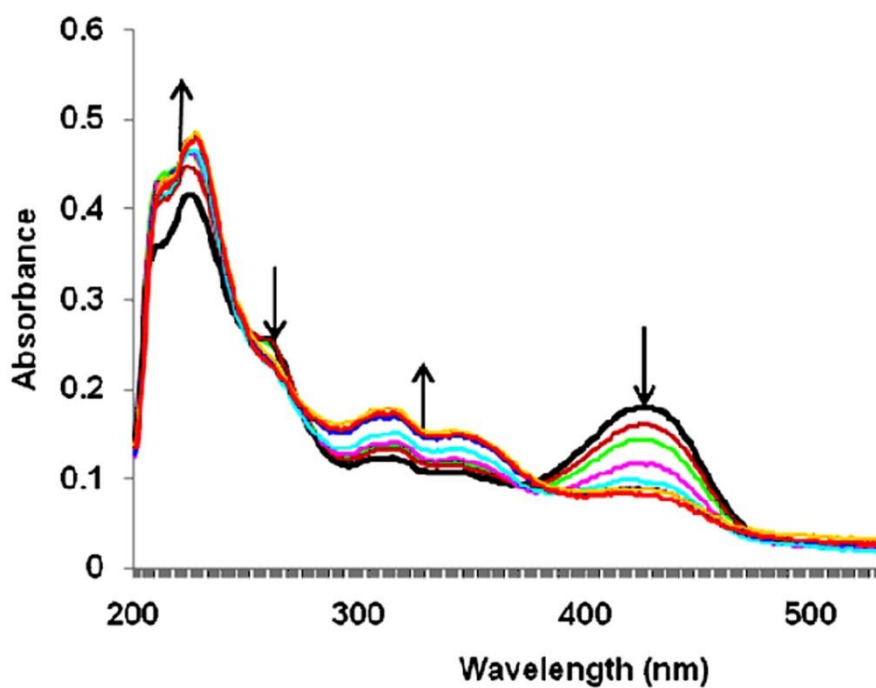

**SI Figure 37.** UV-vis spectra of compound **5** (5  $\mu\text{M}$ ) in water-ethanol (pH 7.2, v/v 9:1) upon addition of increasing amount of  $\text{Hg}(\text{ClO}_4)_2$  (0.1-1 equiv).

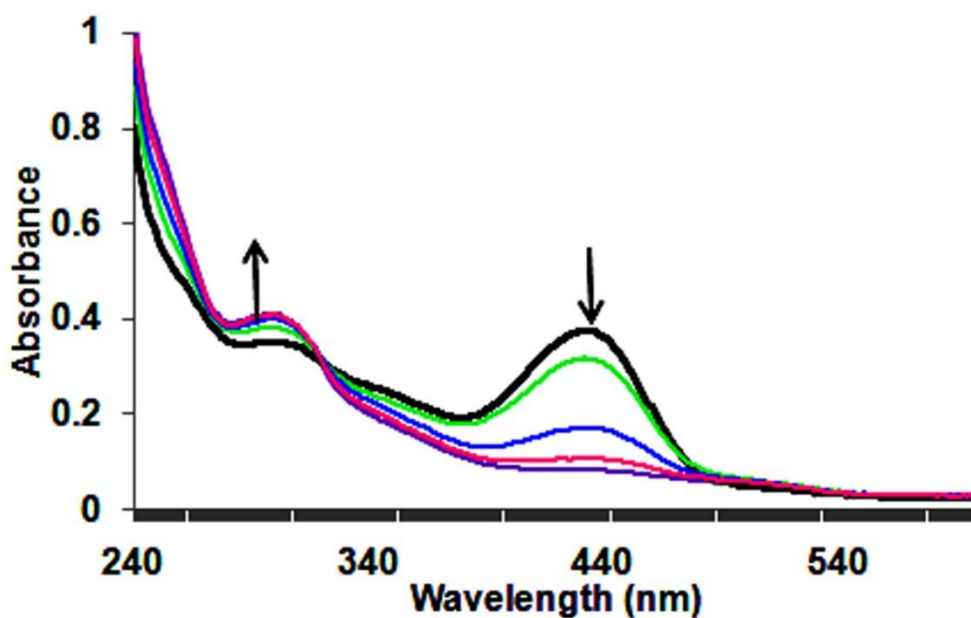

**SI Figure 38.** UV-vis spectra of compound **6** (10  $\mu\text{M}$ ) in water-ethanol (pH 7.2, v/v 9:1) upon addition of increasing amount of  $\text{Hg}(\text{ClO}_4)_2$  (0.1-1 equiv).

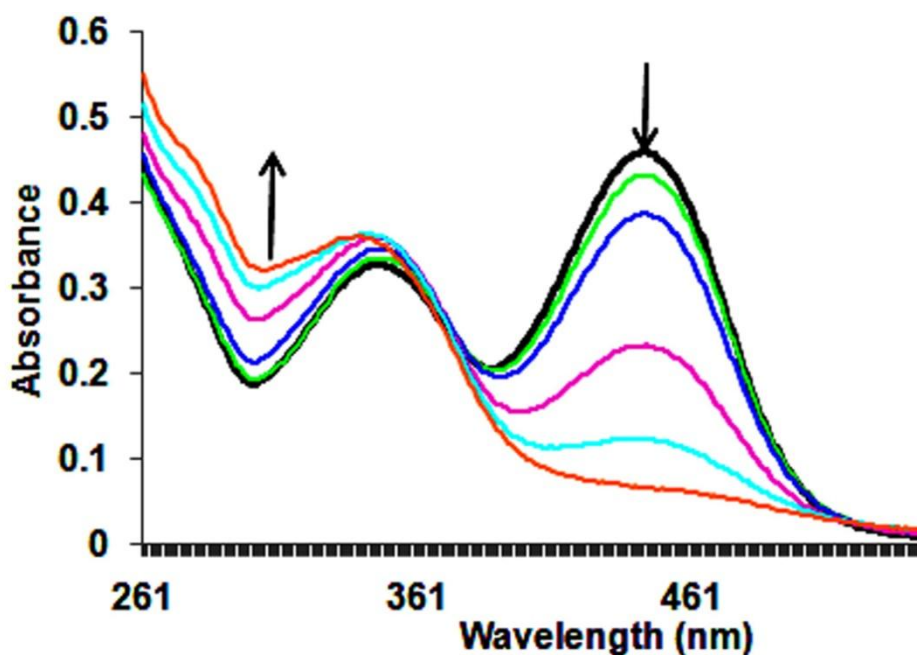

**SI Figure 39.** UV-vis spectra of compound **7** (10  $\mu\text{M}$ ) in water-ethanol (pH 7.2, v/v 9:1) upon addition of increasing amount of  $\text{Hg}(\text{ClO}_4)_2$  (0.1-1 equiv).

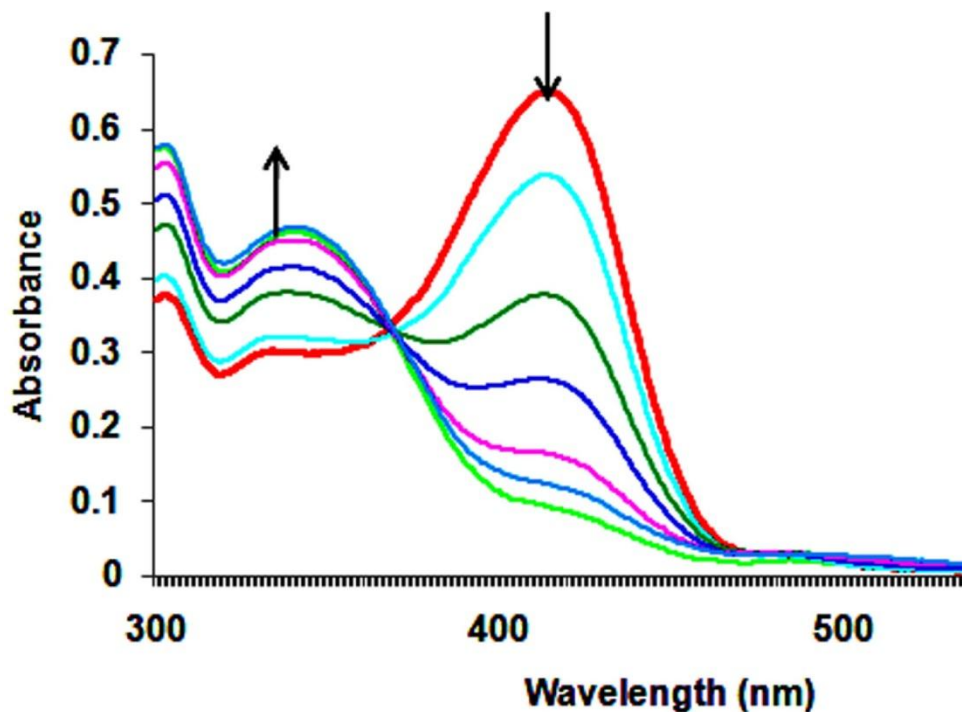

**SI Figure 40.** UV-vis spectra of compound **8** (10  $\mu\text{M}$ ) in water-ethanol (pH 7.2, v/v 9:1) upon addition of increasing amount of  $\text{Hg}(\text{ClO}_4)_2$  (0.1-1 equiv).

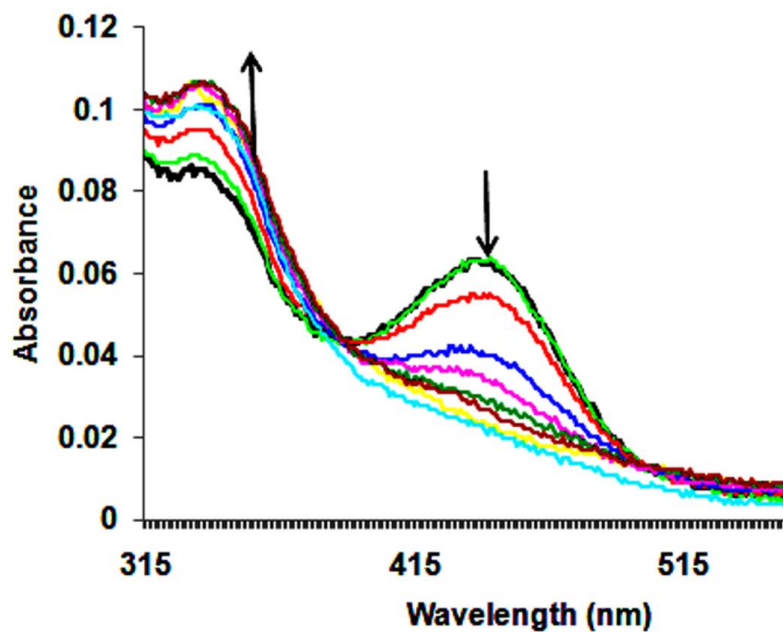

**SI Figure 41.** Changes in UV-vis spectra of compound **9** (5  $\mu\text{M}$ ) in water-ethanol (9:1 v/v, pH 7.2,) upon addition of increasing amount of  $\text{Hg}(\text{ClO}_4)_2$  (0.1-1 equiv).

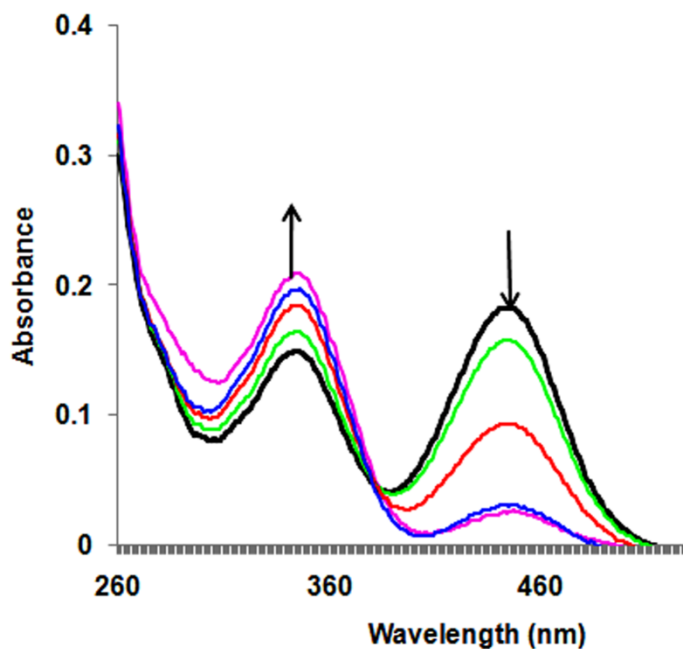

**SI Figure 42.** Changes in UV-vis spectra of compound **10** (5  $\mu\text{M}$ ) in water-ethanol (9:1 v/v, pH 7.2,) upon addition of increasing amount of  $\text{Hg}(\text{ClO}_4)_2$  (0.1-1 equiv).

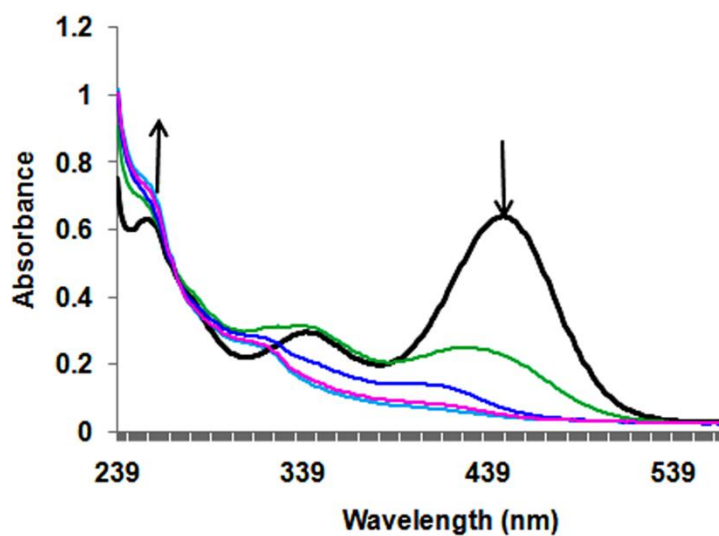

**SI Figure 43.** UV-vis spectra of compound **11** (10  $\mu$ M) in water-ethanol (pH 7.2, v/v 9:1) upon addition of increasing amount of  $\text{Hg}(\text{ClO}_4)_2$  (0.1-1 equiv).

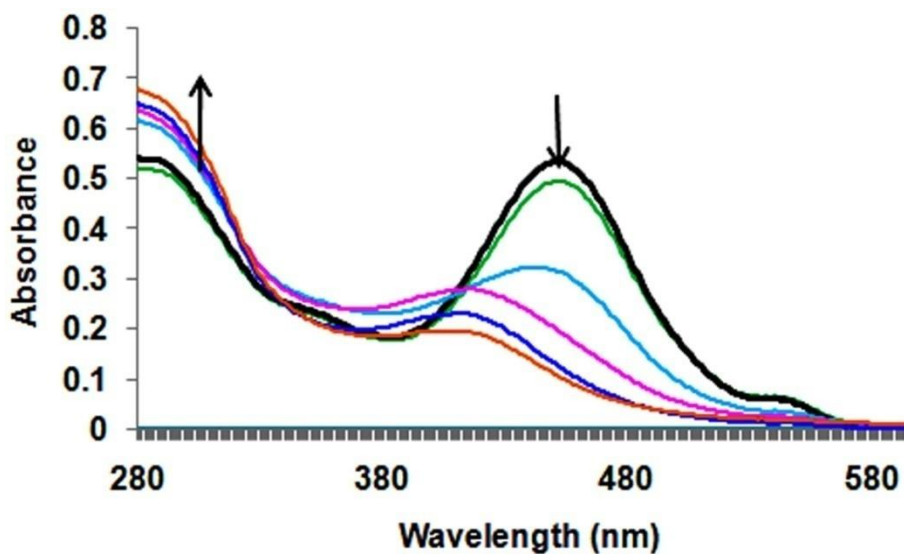

**SI Figure 44.** UV-vis spectra of compound **12** (10  $\mu$ M) in water-ethanol (pH 7.2, v/v 9:1) upon addition of increasing amount of  $\text{Hg}(\text{ClO}_4)_2$  (0.1-1 equiv).

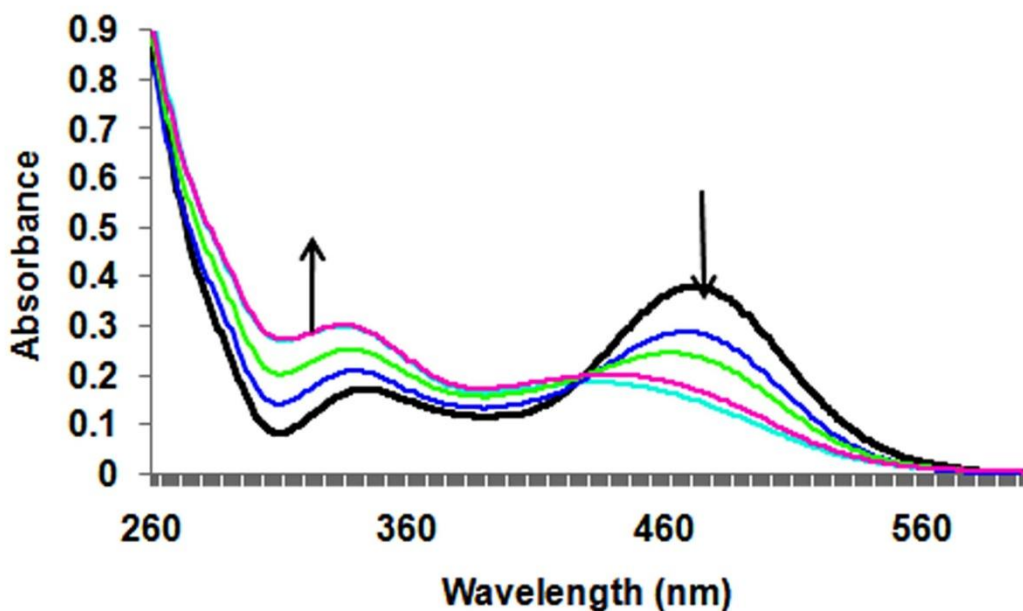

**SI Figure 45.** UV-vis spectra of compound **13** (10 μM) in aqueous solution (water-ethanol, pH 7.2, v/v 9:1) upon addition of increasing amount of Hg(ClO<sub>4</sub>)<sub>2</sub> (0.1-1 equiv).

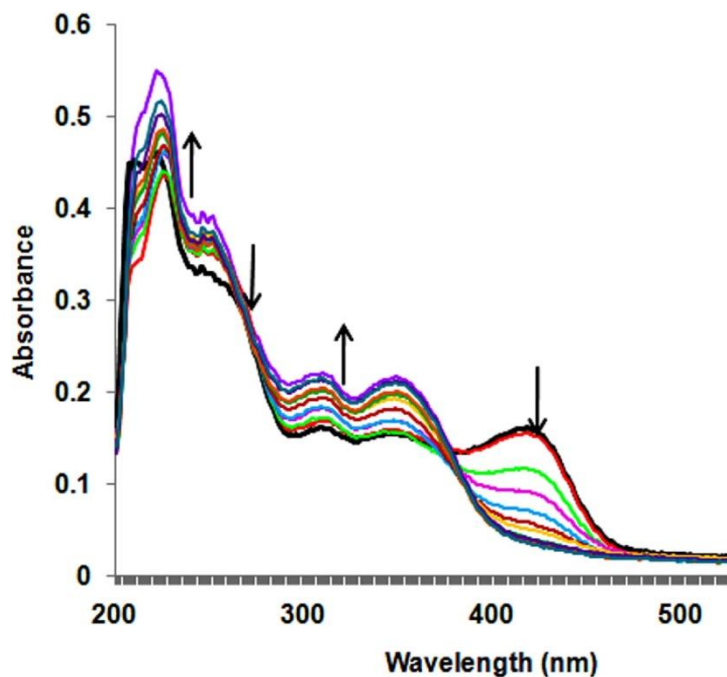

**SI Figure 46.** UV-vis spectra of compound **4** (5 μM) in water-ethanol (pH 7.2, v/v 9:1) upon addition of increasing amounts of Fe(ClO<sub>4</sub>)<sub>3</sub> (0.1-1 equiv).

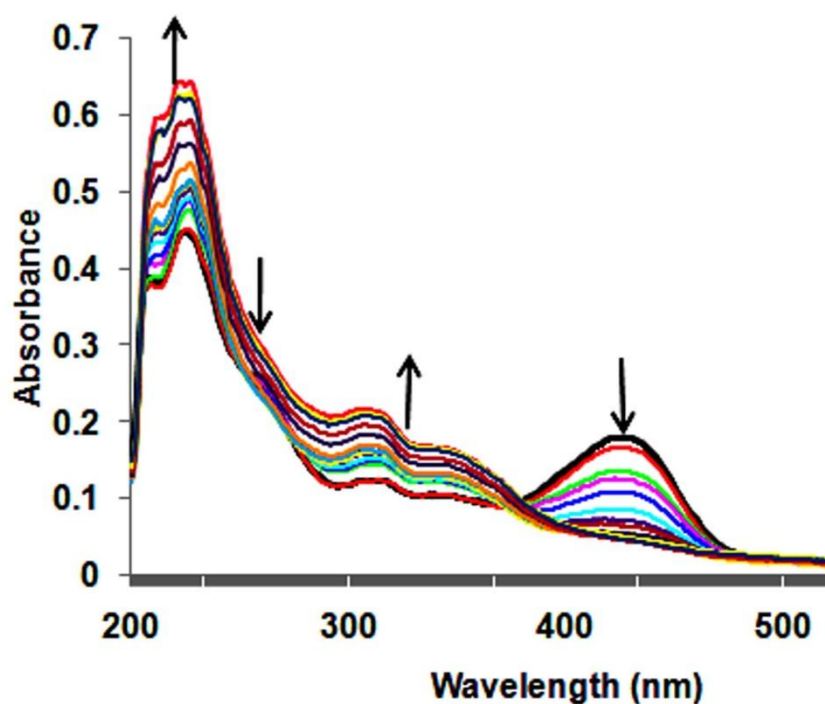

**SI Figure 47.** UV-vis spectra of compound **5** (5  $\mu$ M) in water-ethanol (pH 7.2, v/v 9:1) upon addition of increasing amount of Fe(ClO<sub>4</sub>)<sub>3</sub> (0.1-1 equiv).

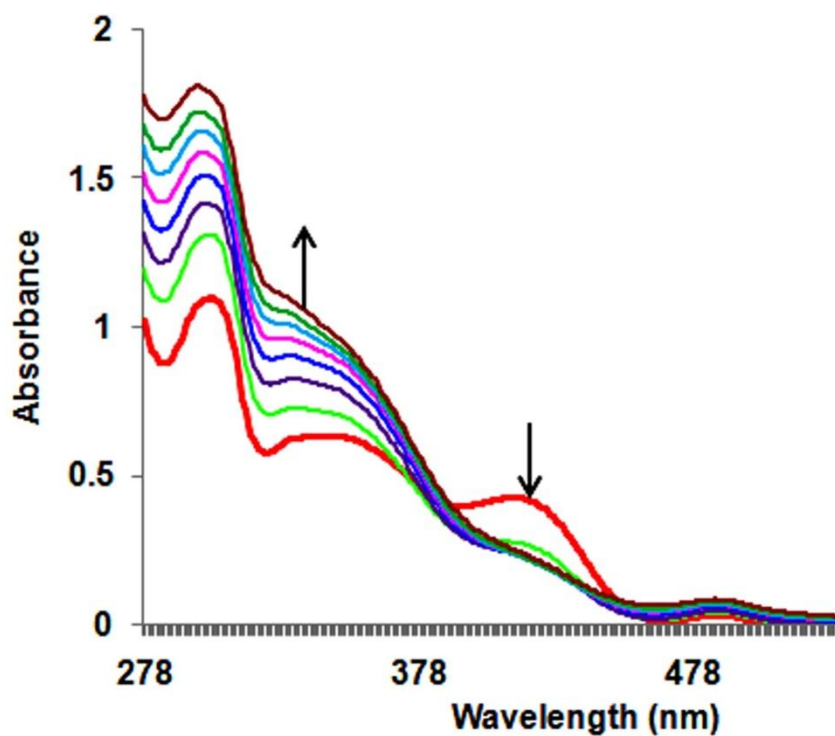

**SI Figure 48.** UV-vis spectra of compound **8** (10  $\mu$ M) in water-ethanol (pH 7.2, v/v 9:1) upon addition of increasing amount of Fe(ClO<sub>4</sub>)<sub>3</sub> (0.1 - 1 equiv).

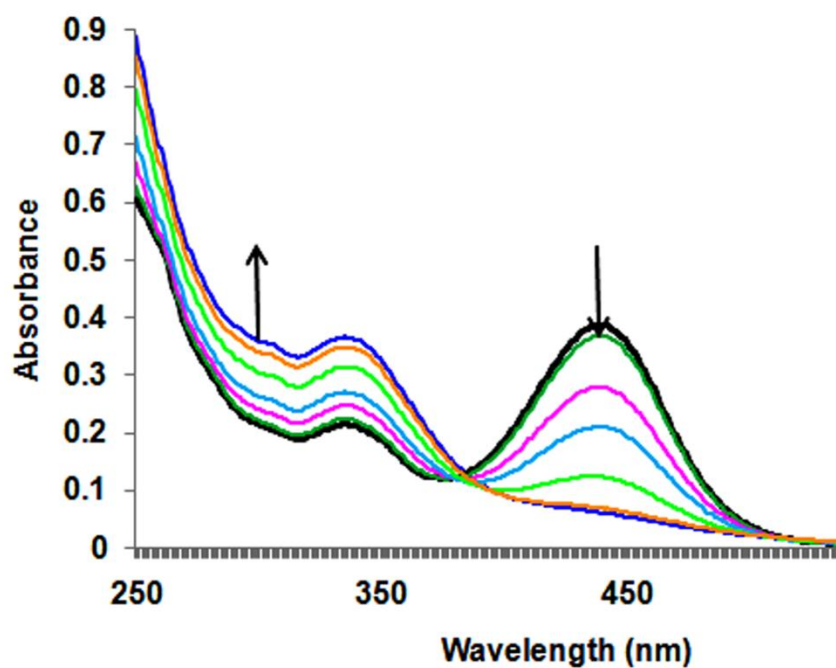

**SI Figure 49.** UV-vis spectra of compound **9** (5 μM) in water-ethanol (pH 7.2, v/v 9:1) upon addition of increasing amount of  $\text{Fe}(\text{ClO}_4)_3$  (0.1-1 equiv).

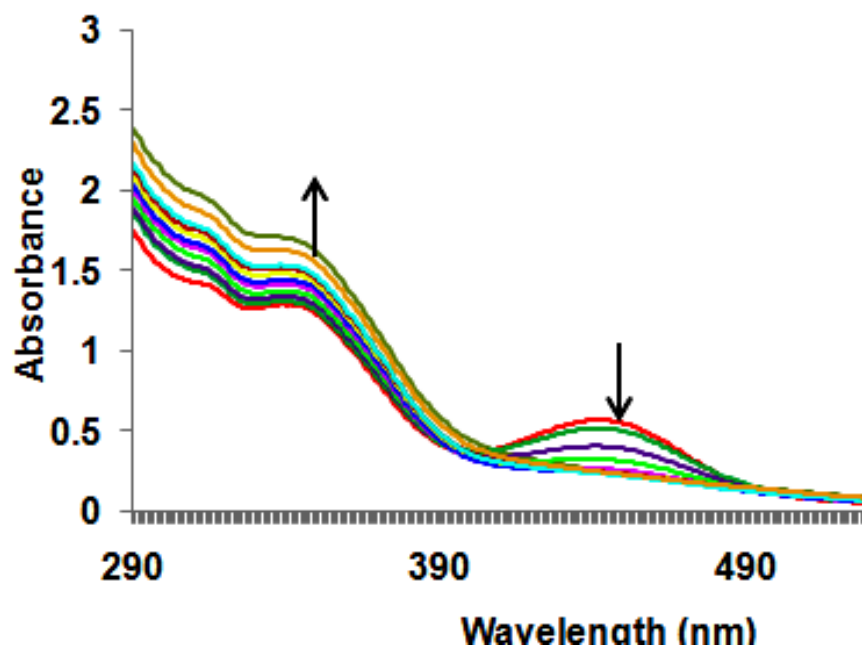

**SI Figure 50.** UV-vis spectra of compound **10** (5 μM) in water-ethanol (pH 7.2, v/v 9:1) upon addition of increasing amount of  $\text{Fe}(\text{ClO}_4)_3$  (0.1-1 equiv).

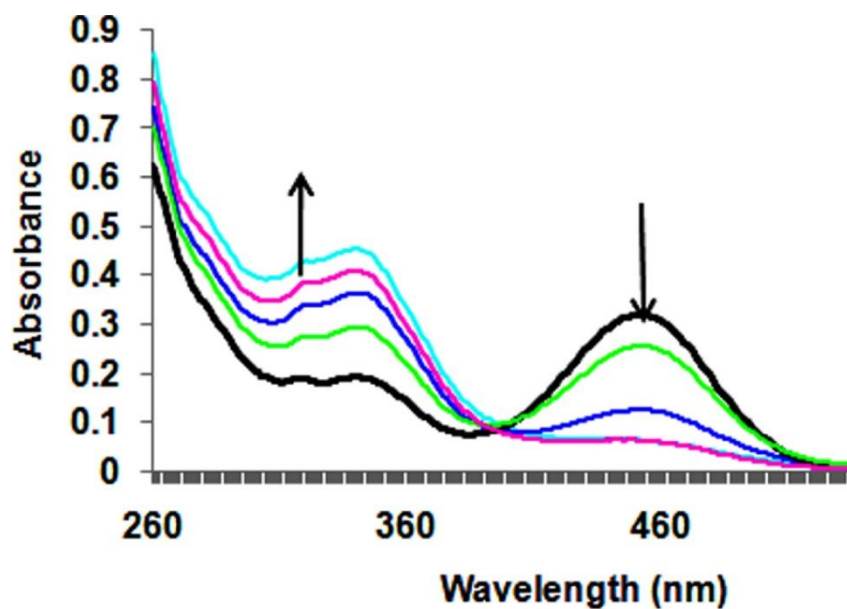

**SI Figure 51.** UV-vis spectra of compound **11** (10  $\mu$ M) in water-ethanol (pH 7.2, v/v 9:1) upon addition of increasing amount of  $\text{Fe}(\text{ClO}_4)_3$  (0.1-1 equiv).

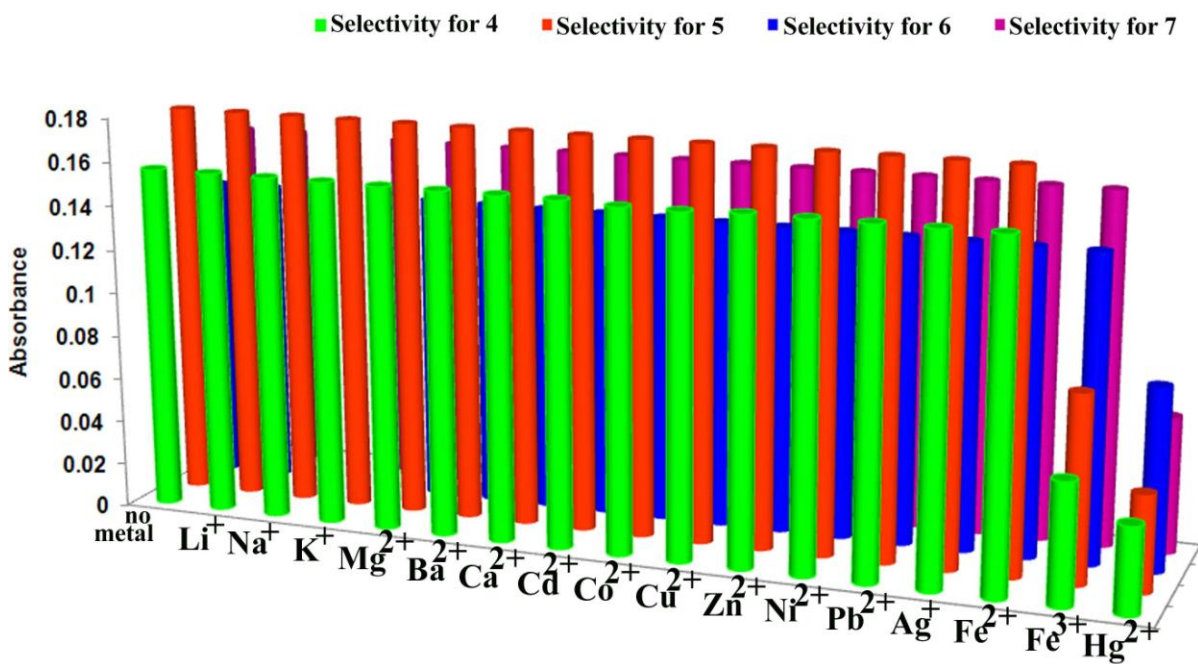

**SI Figure 52.** Selectivity of compounds **4**, **5**, **6** and **7** (5  $\mu$ M) towards  $\text{Hg}^{2+}$  among different cations.

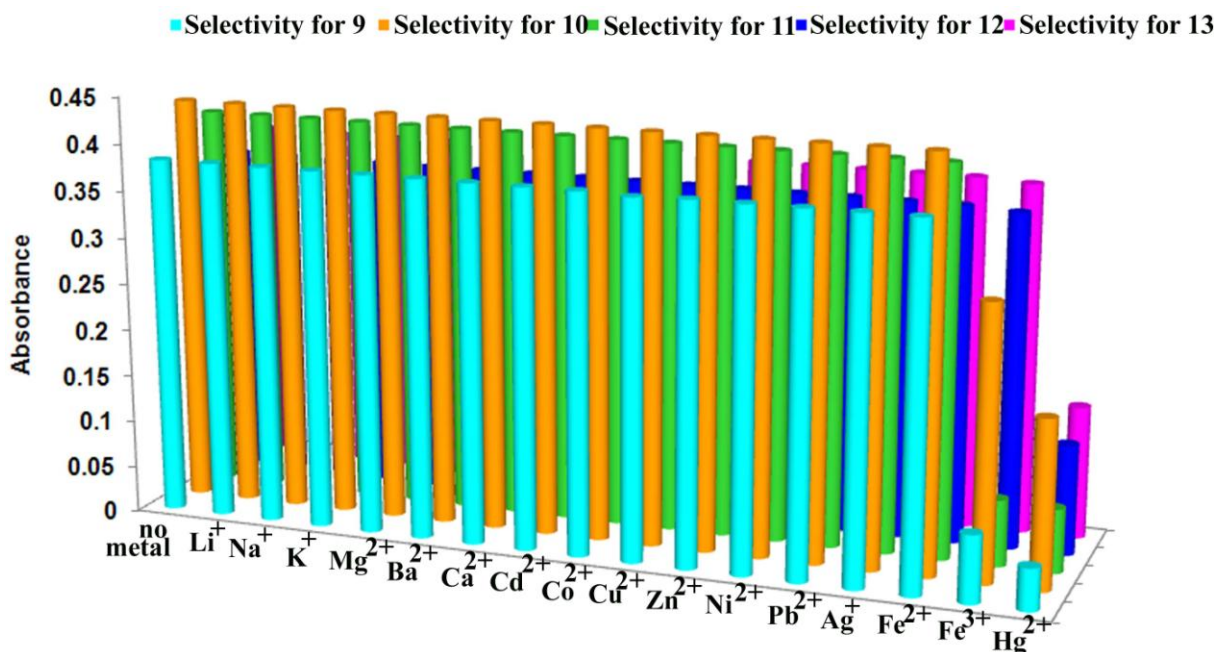

**SI Figure 53.** Selectivity of compounds **9**, **10**, **11**, **12** and **13** (10  $\mu\text{M}$ ) towards  $\text{Hg}^{2+}$  among different cations.

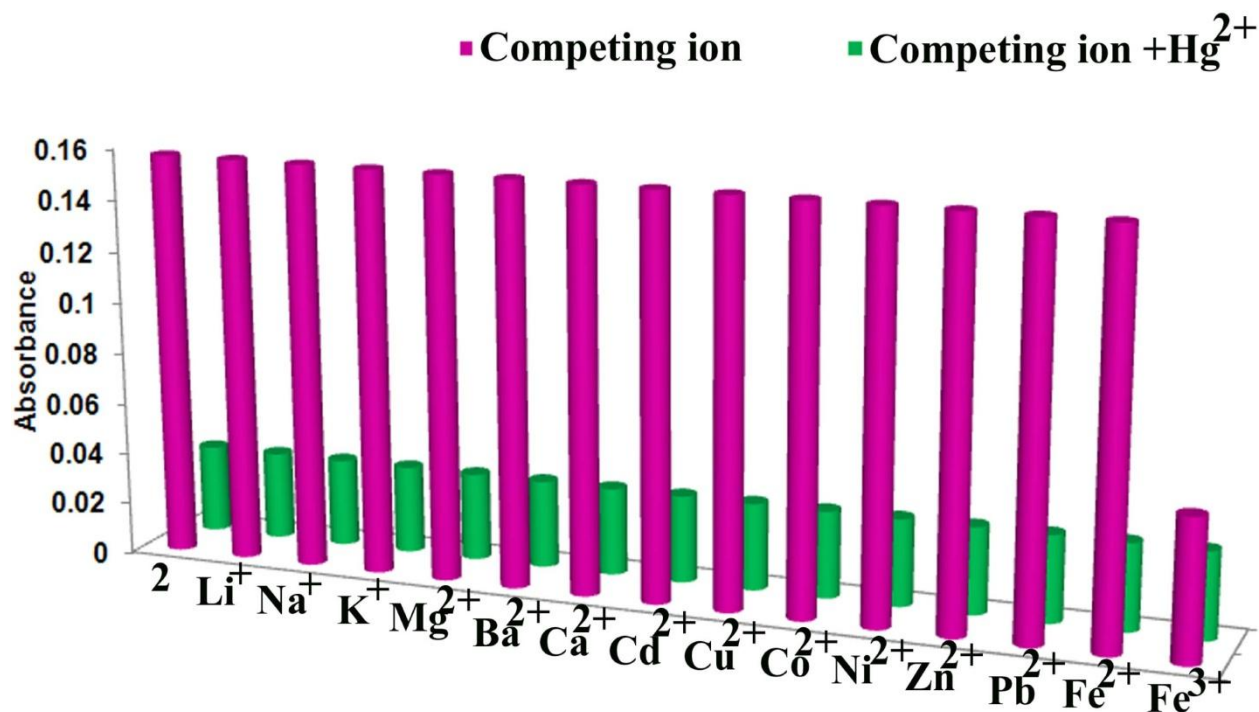

**SI Figure 54.** Response of compound **4** (5  $\mu\text{M}$ ) in water-ethanol (9:1 v/v) at pH 7.2 to various cations monitored at 422 nm: **4** (5  $\mu\text{M}$ ) in presence of  $\text{Hg}^{2+}$  (1  $\mu\text{M}$ ) and interfering ions  $\text{Li}^+$ ,  $\text{Na}^+$ ,  $\text{K}^+$ ,  $\text{Mg}^{2+}$ ,  $\text{Ba}^{2+}$ ,  $\text{Ca}^{2+}$ ,  $\text{Cd}^{2+}$ ,  $\text{Co}^{2+}$ ,  $\text{Cu}^{2+}$ ,  $\text{Zn}^{2+}$ ,  $\text{Pb}^{2+}$ ,  $\text{Fe}^{2+}$  and  $\text{Fe}^{3+}$  (100 equiv).

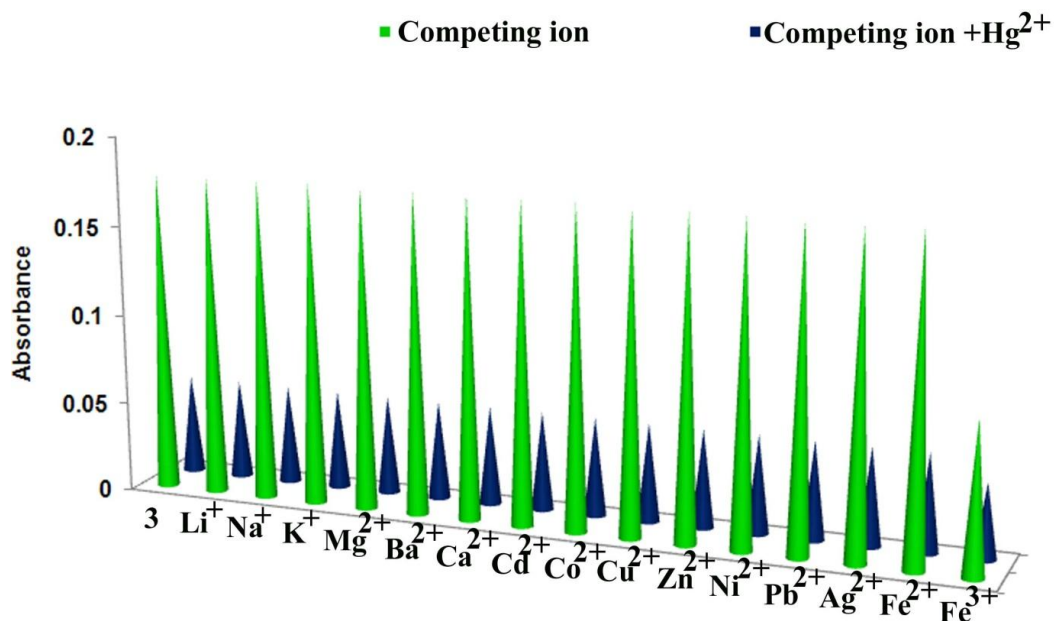

**SI Figure 55.** Response of compound **5** (5 μM) in water-ethanol (9:1 v/v) at pH 7.2 to various cations monitored at 422 nm: **5** (5 μM) in presence of Hg<sup>2+</sup> (1 μM) and interfering ions Li<sup>+</sup>, Na<sup>+</sup>, K<sup>+</sup>, Mg<sup>2+</sup>, Ba<sup>2+</sup>, Ca<sup>2+</sup>, Cd<sup>2+</sup>, Co<sup>2+</sup>, Cu<sup>2+</sup>, Zn<sup>2+</sup>, Pb<sup>2+</sup>, Ag<sup>+</sup>, Fe<sup>2+</sup> and Fe<sup>3+</sup> (100 equiv).

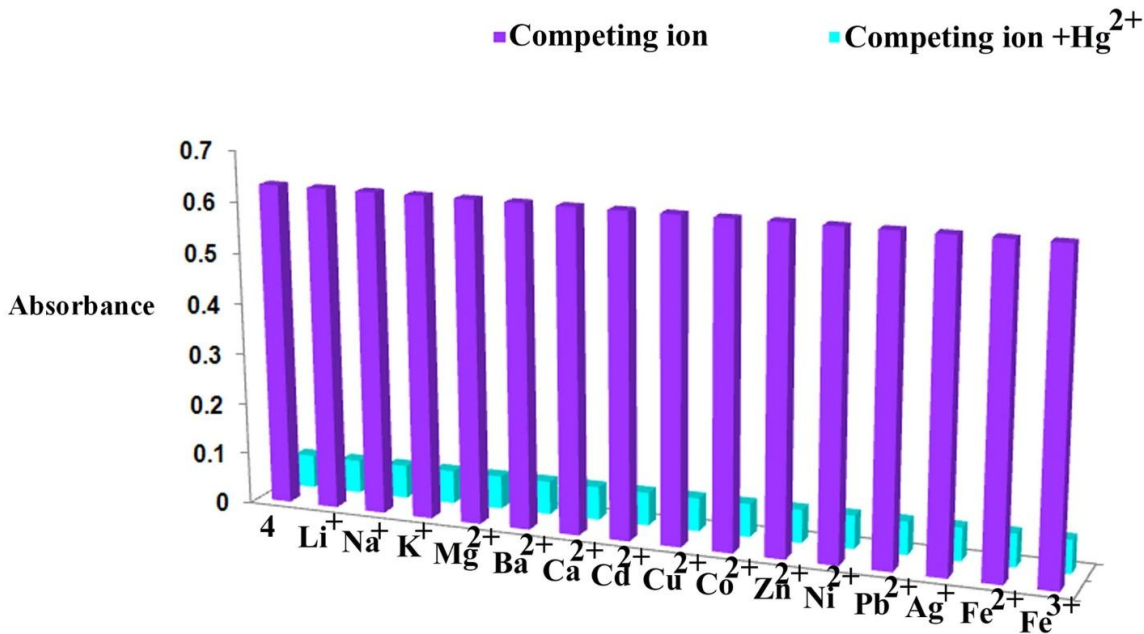

**SI Figure 56.** Response of compound **6** (10 μM) in water-ethanol (9:1 v/v) at pH 7.2 to various cations monitored at 434 nm: **6** (2 μM) in presence of Hg<sup>2+</sup> (2 μM) and interfering ions Li<sup>+</sup>, Na<sup>+</sup>, K<sup>+</sup>, Mg<sup>2+</sup>, Ba<sup>2+</sup>, Ca<sup>2+</sup>, Cd<sup>2+</sup>, Co<sup>2+</sup>, Cu<sup>2+</sup>, Zn<sup>2+</sup>, Pb<sup>2+</sup>, Ag<sup>+</sup>, Fe<sup>2+</sup> and Fe<sup>3+</sup> (100 equiv).

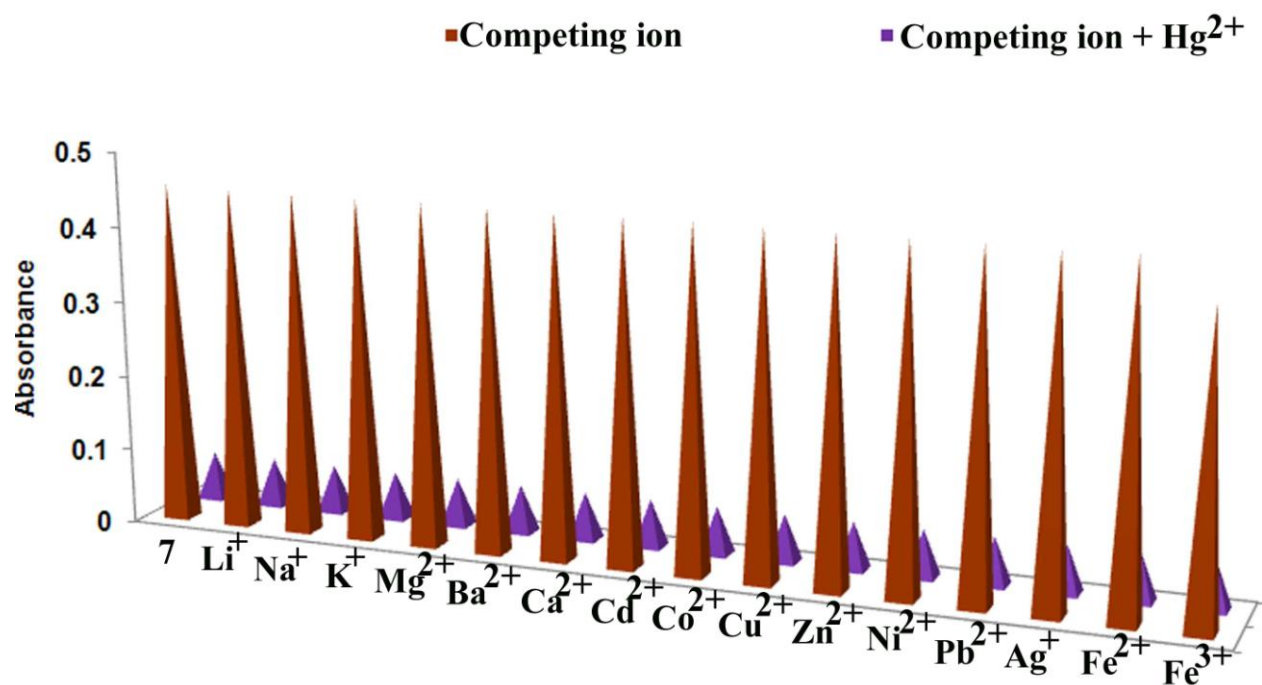

**SI Figure 57.** Response of compound **7** (10  $\mu$ M) in water-ethanol (9:1 v/v) at pH 7.2 to various cations monitored at 434 nm: **7** (10  $\mu$ M) in presence of  $\text{Hg}^{2+}$  (2  $\mu$ M) and interfering ions  $\text{Li}^+$ ,  $\text{Na}^+$ ,  $\text{K}^+$ ,  $\text{Mg}^{2+}$ ,  $\text{Ba}^{2+}$ ,  $\text{Ca}^{2+}$ ,  $\text{Cd}^{2+}$ ,  $\text{Co}^{2+}$ ,  $\text{Cu}^{2+}$ ,  $\text{Zn}^{2+}$ ,  $\text{Pb}^{2+}$ ,  $\text{Ag}^+$ ,  $\text{Fe}^{2+}$  and  $\text{Fe}^{3+}$  (100 equiv).

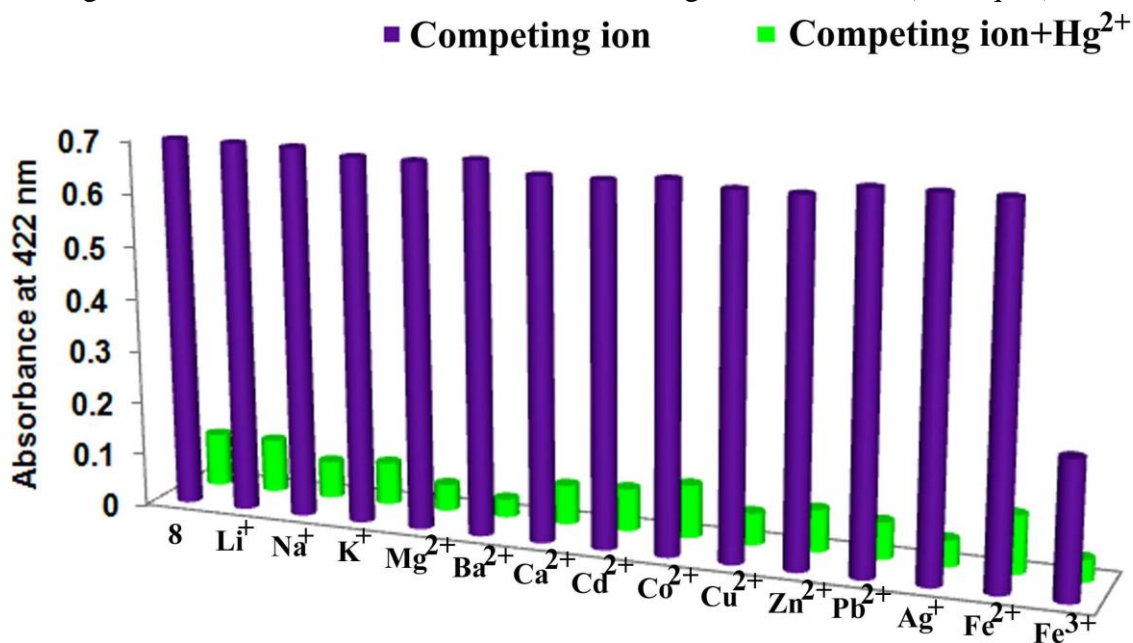

**SI Figure 58.** Response of compound **8** (10  $\mu$ M) in water-ethanol (9:1 v/v) at pH 7.2 to various cations monitored at 422 nm: **8** (10  $\mu$ M) in presence of  $\text{Hg}^{2+}$  (2  $\mu$ M) and interfering ions  $\text{Li}^+$ ,  $\text{Na}^+$ ,  $\text{K}^+$ ,  $\text{Mg}^{2+}$ ,  $\text{Ba}^{2+}$ ,  $\text{Ca}^{2+}$ ,  $\text{Cd}^{2+}$ ,  $\text{Co}^{2+}$ ,  $\text{Cu}^{2+}$ ,  $\text{Zn}^{2+}$ ,  $\text{Pb}^{2+}$ ,  $\text{Ag}^+$ ,  $\text{Fe}^{2+}$  and  $\text{Fe}^{3+}$  (100 equiv).

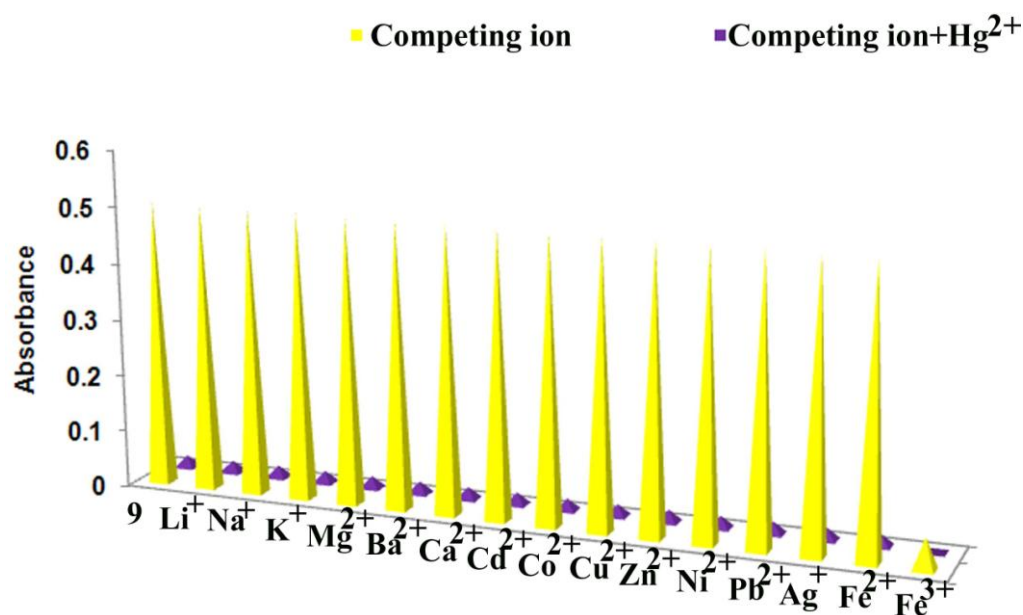

**SI Figure 59.** Response of compound **9** (10  $\mu\text{M}$ ) in water-ethanol (9:1 v/v) at pH 7.2 to various cations monitored at 422 nm: **9** (10  $\mu\text{M}$ ) in presence of  $\text{Hg}^{2+}$  (2  $\mu\text{M}$ ) and interfering ions  $\text{Li}^+$ ,  $\text{Na}^+$ ,  $\text{K}^+$ ,  $\text{Mg}^{2+}$ ,  $\text{Ba}^{2+}$ ,  $\text{Ca}^{2+}$ ,  $\text{Cd}^{2+}$ ,  $\text{Co}^{2+}$ ,  $\text{Cu}^{2+}$ ,  $\text{Zn}^{2+}$ ,  $\text{Pb}^{2+}$ ,  $\text{Ag}^+$ ,  $\text{Fe}^{2+}$  and  $\text{Fe}^{3+}$  (100 equiv).

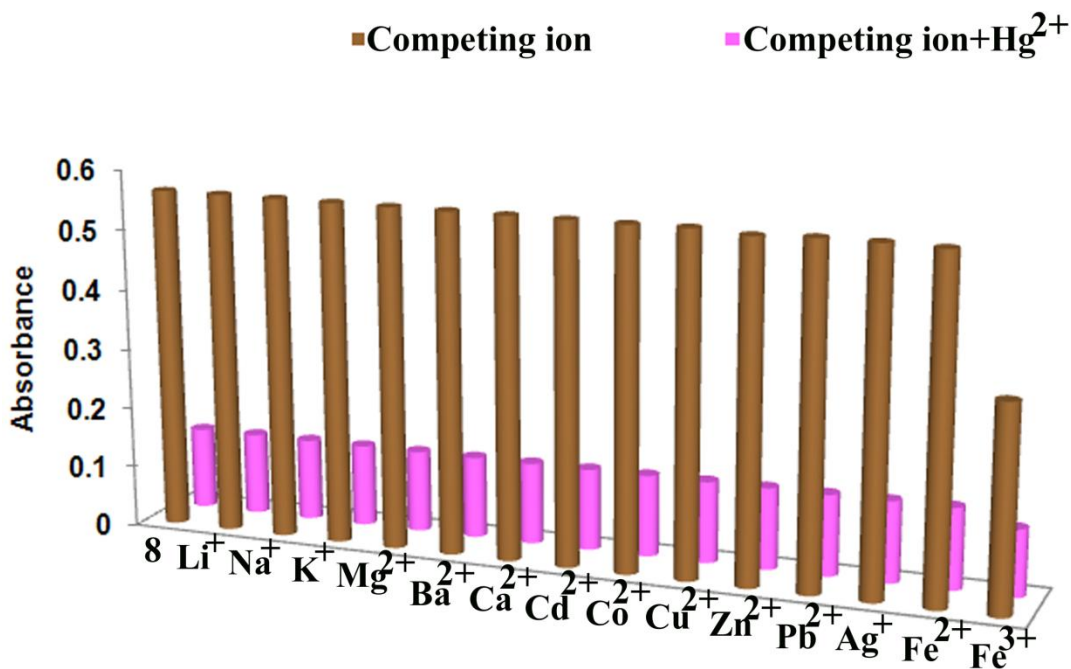

**SI Figure 60.** Response of compound **10** (5  $\mu\text{M}$ ) in water-ethanol (9:1 v/v) at pH 7.2 to various cations monitored at 442 nm: **10** (5  $\mu\text{M}$ ) in presence of  $\text{Hg}^{2+}$  (5  $\mu\text{M}$ ) and interfering ions  $\text{Li}^+$ ,  $\text{Na}^+$ ,  $\text{K}^+$ ,  $\text{Mg}^{2+}$ ,  $\text{Ba}^{2+}$ ,  $\text{Ca}^{2+}$ ,  $\text{Cd}^{2+}$ ,  $\text{Co}^{2+}$ ,  $\text{Cu}^{2+}$ ,  $\text{Zn}^{2+}$ ,  $\text{Pb}^{2+}$ ,  $\text{Ag}^+$ ,  $\text{Fe}^{2+}$  and  $\text{Fe}^{3+}$  (100 equiv).

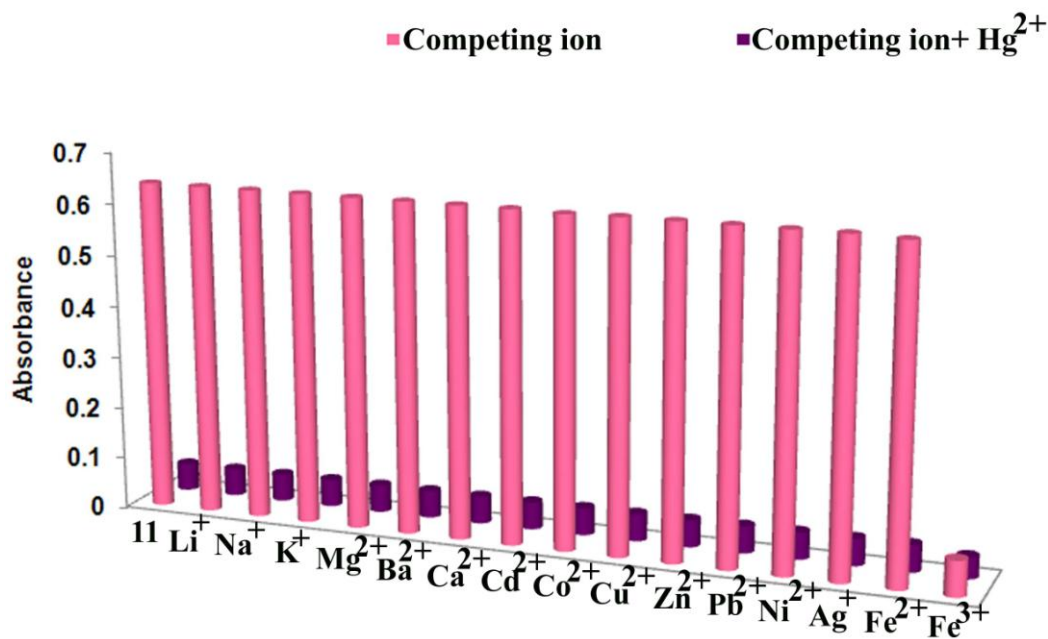

**SI Figure 61.** Response of compound **11** (10  $\mu$ M) in water-ethanol (9:1 v/v) at pH 7.2 to various cations monitored at 422 nm: **11** (10  $\mu$ M) in presence of  $\text{Hg}^{2+}$  (2  $\mu$ M) and interfering ions  $\text{Li}^+$ ,  $\text{Na}^+$ ,  $\text{K}^+$ ,  $\text{Mg}^{2+}$ ,  $\text{Ba}^{2+}$ ,  $\text{Ca}^{2+}$ ,  $\text{Cd}^{2+}$ ,  $\text{Co}^{2+}$ ,  $\text{Cu}^{2+}$ ,  $\text{Zn}^{2+}$ ,  $\text{Pb}^{2+}$ ,  $\text{Ag}^+$ ,  $\text{Fe}^{2+}$  and  $\text{Fe}^{3+}$  (100 equiv).

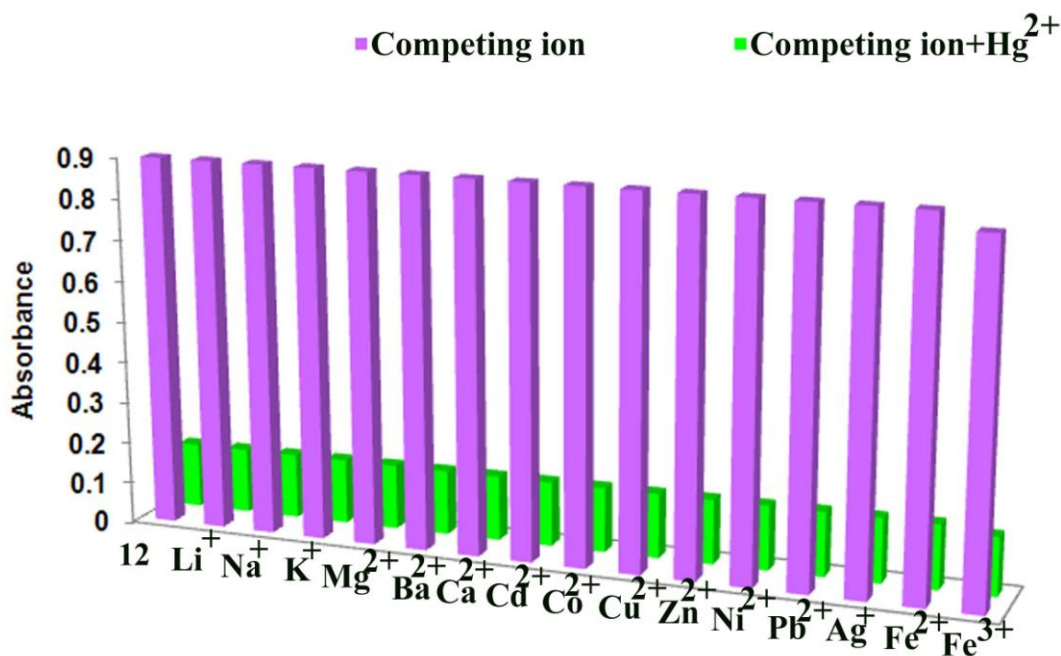

**SI Figure 62.** Response of compound **12** (10  $\mu$ M) in water-ethanol (9:1 v/v) at pH 7.2 to various cations monitored at 448 nm: **12** (10  $\mu$ M) in presence of  $\text{Hg}^{2+}$  (2  $\mu$ M) and interfering ions  $\text{Li}^+$ ,  $\text{Na}^+$ ,  $\text{K}^+$ ,  $\text{Mg}^{2+}$ ,  $\text{Ba}^{2+}$ ,  $\text{Ca}^{2+}$ ,  $\text{Cd}^{2+}$ ,  $\text{Co}^{2+}$ ,  $\text{Cu}^{2+}$ ,  $\text{Zn}^{2+}$ ,  $\text{Pb}^{2+}$ ,  $\text{Ag}^+$ ,  $\text{Fe}^{2+}$  and  $\text{Fe}^{3+}$  (100 equiv).

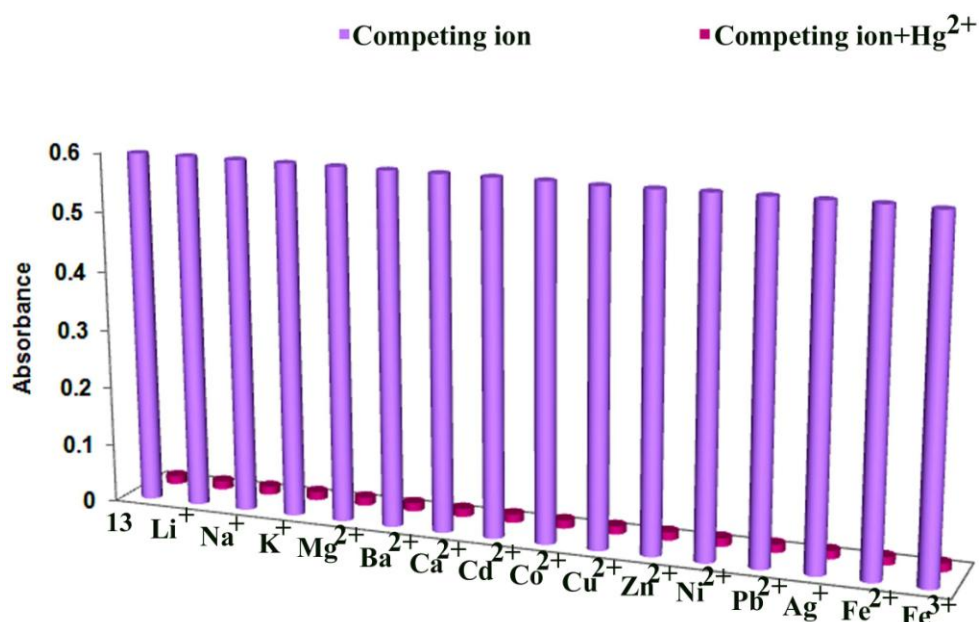

**SI Figure 63.** Response of compound **13** (10  $\mu\text{M}$ ) in water-ethanol (9:1 v/v) at pH 7.2 to various cations monitored at 467 nm **13** (10  $\mu\text{M}$ ) in the presence of  $\text{Hg}^{2+}$  (2  $\mu\text{M}$ ) and interfering ions  $\text{Li}^+$ ,  $\text{Na}^+$ ,  $\text{K}^+$   $\text{Mg}^{2+}$ ,  $\text{Ba}^{2+}$ ,  $\text{Ca}^{2+}$ ,  $\text{Cd}^{2+}$ ,  $\text{Co}^{2+}$ ,  $\text{Cu}^{2+}$ ,  $\text{Zn}^{2+}$ ,  $\text{Pb}^{2+}$ ,  $\text{Ag}^+$ ,  $\text{Fe}^{2+}$  and  $\text{Fe}^{3+}$  (100 equiv).

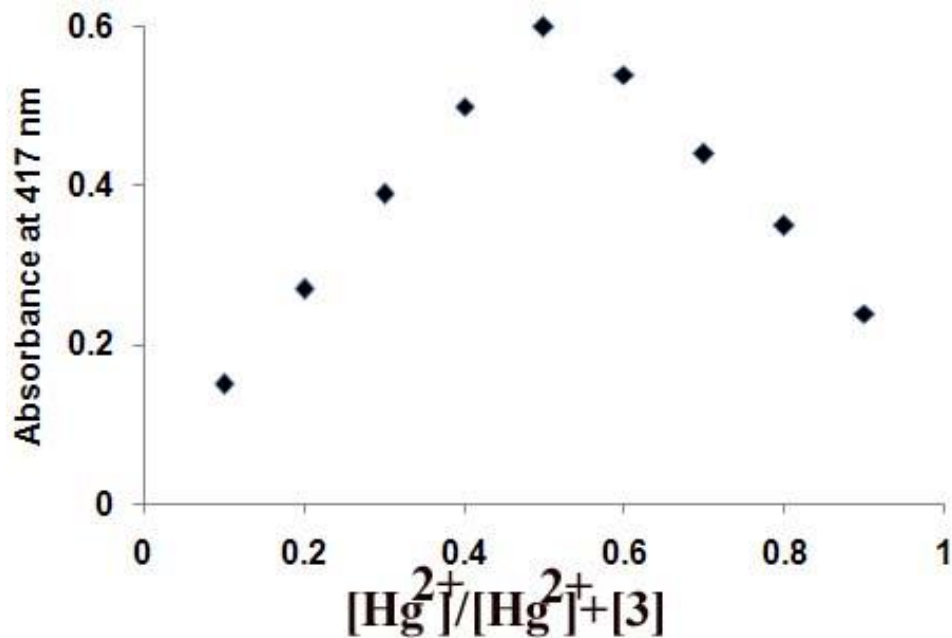

**SI Figure 64.** Job's plot for compound **3**, absorbance monitored at 417 nm.

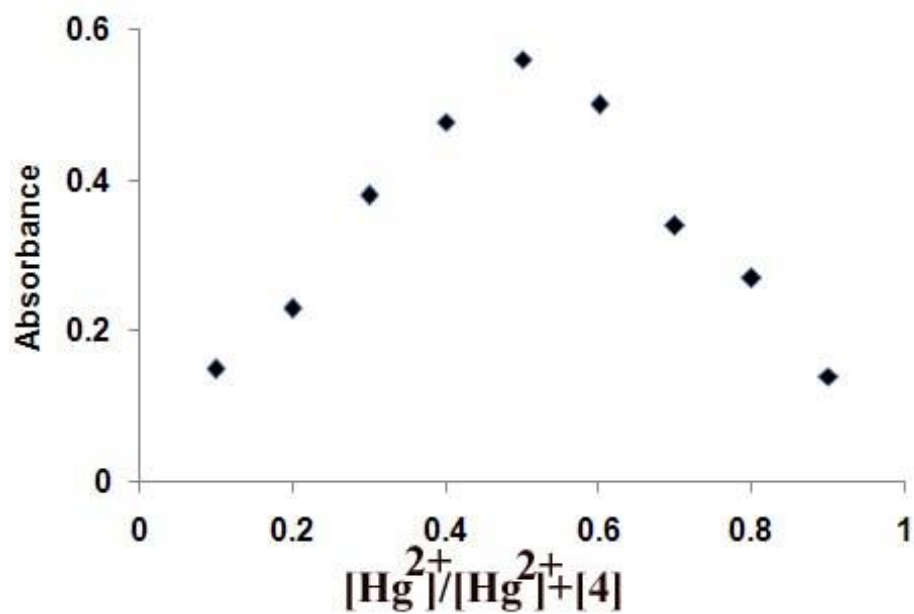

**SI Figure 65.** Job's plot for compound **4**, absorbance monitored at 422 nm.

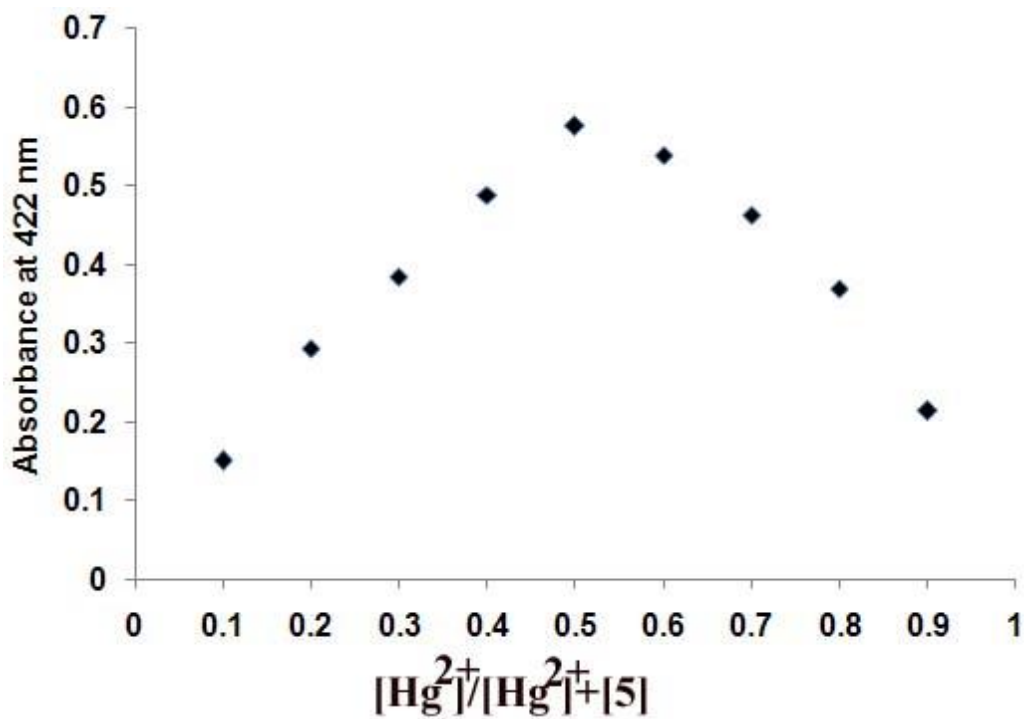

**SI Figure 66.** Job's plot for compound **5**, absorbance monitored at 422 nm.

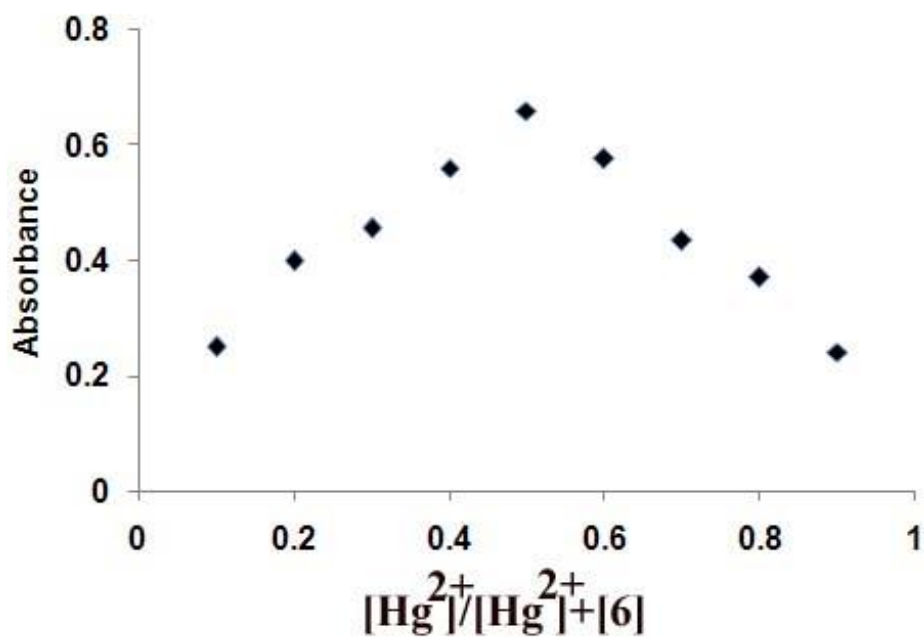

**SI Figure 67.** Job's plot for compound **6**, absorbance monitored at 434 nm.

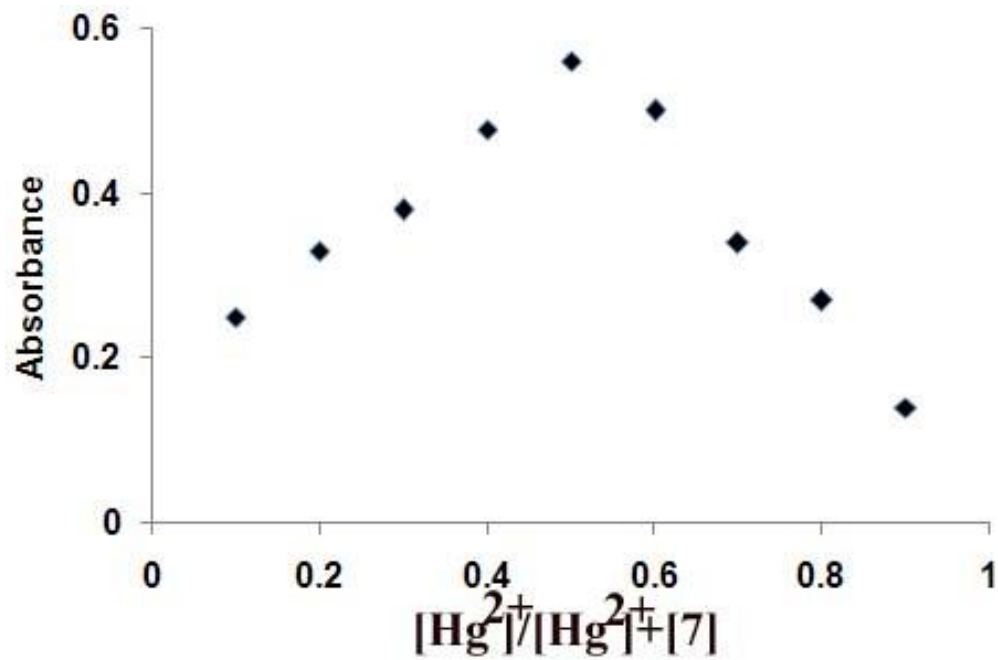

**SI Figure 68.** Job's plot for compound **7**, absorbance monitored at 422 nm.

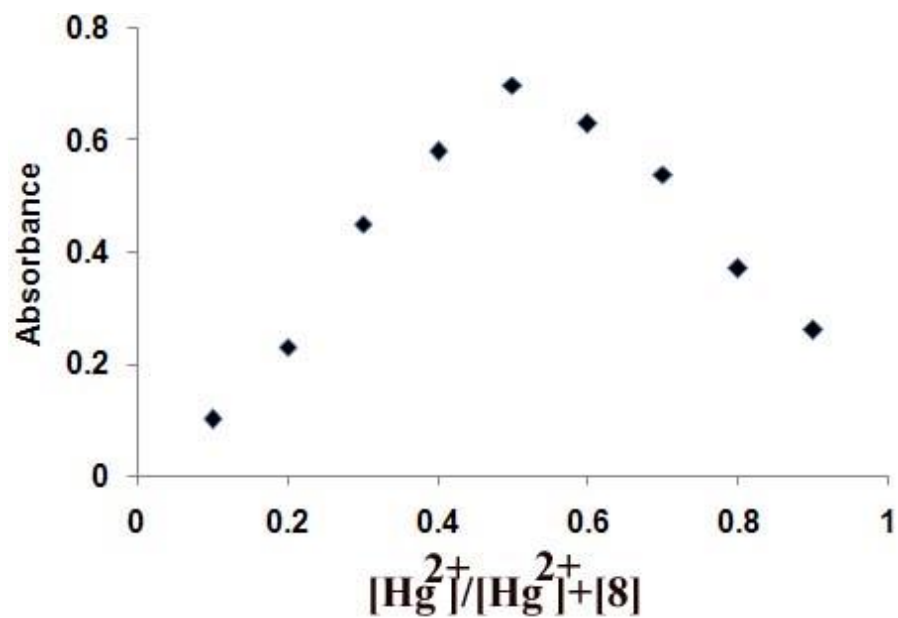

**SI Figure 69.** Job's plot for compound **8**, absorbance monitored at 422 nm.

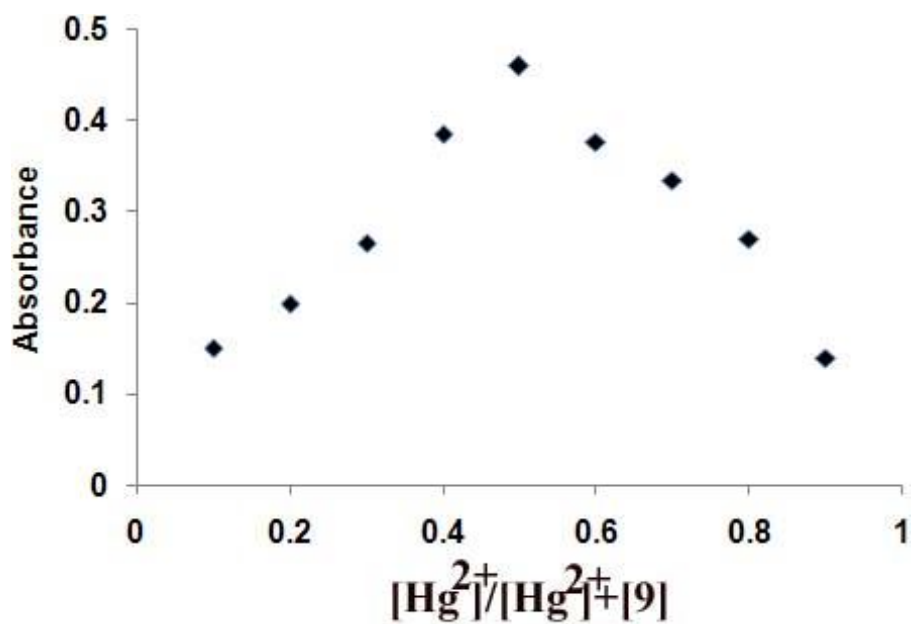

**SI Figure 70.** Job's plot for compound **9**, absorbance monitored at 422 nm.

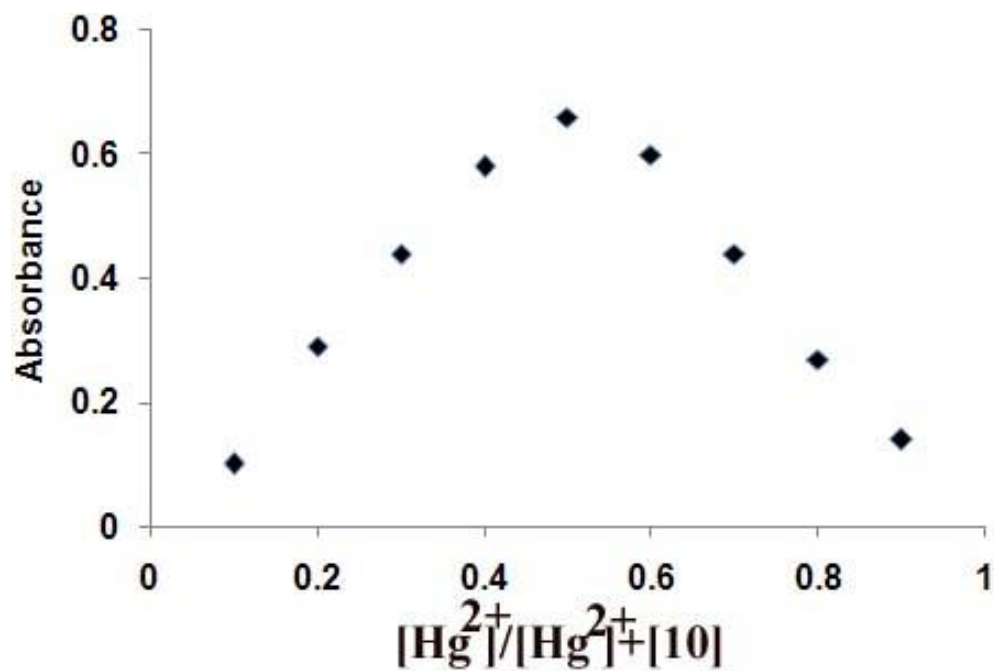

**SI Figure 71.** Job's plot for compound **10**, absorbance monitored at 442 nm.

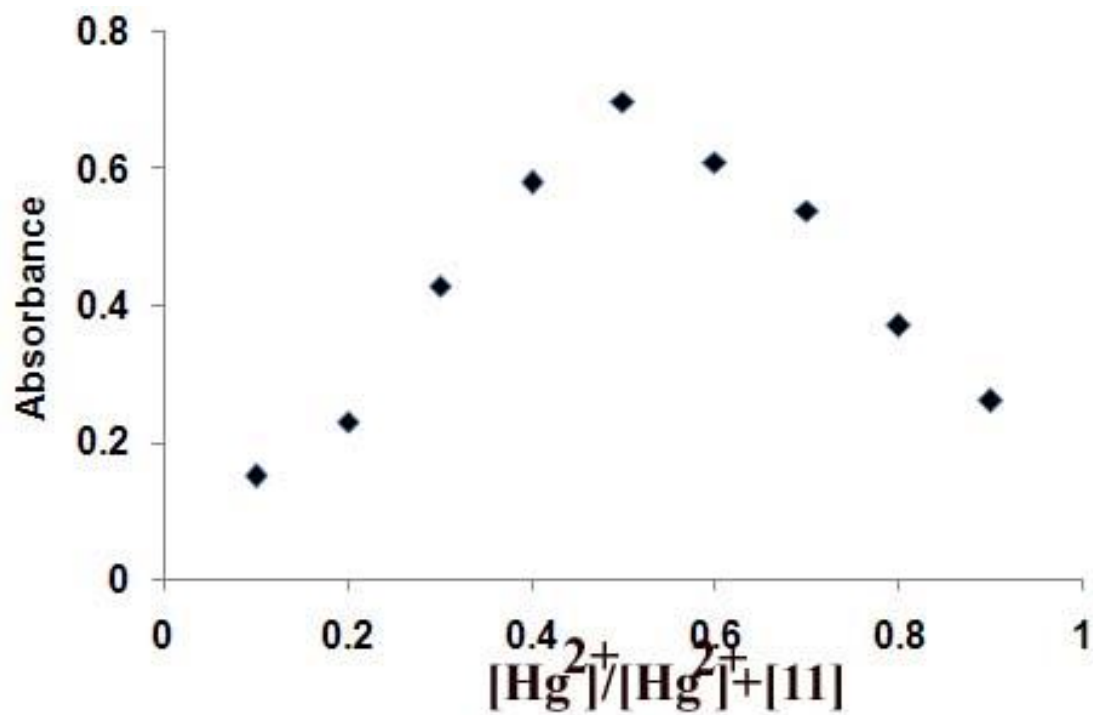

**SI Figure 72.** Job's plot for compound **11**, absorbance monitored at 439 nm.

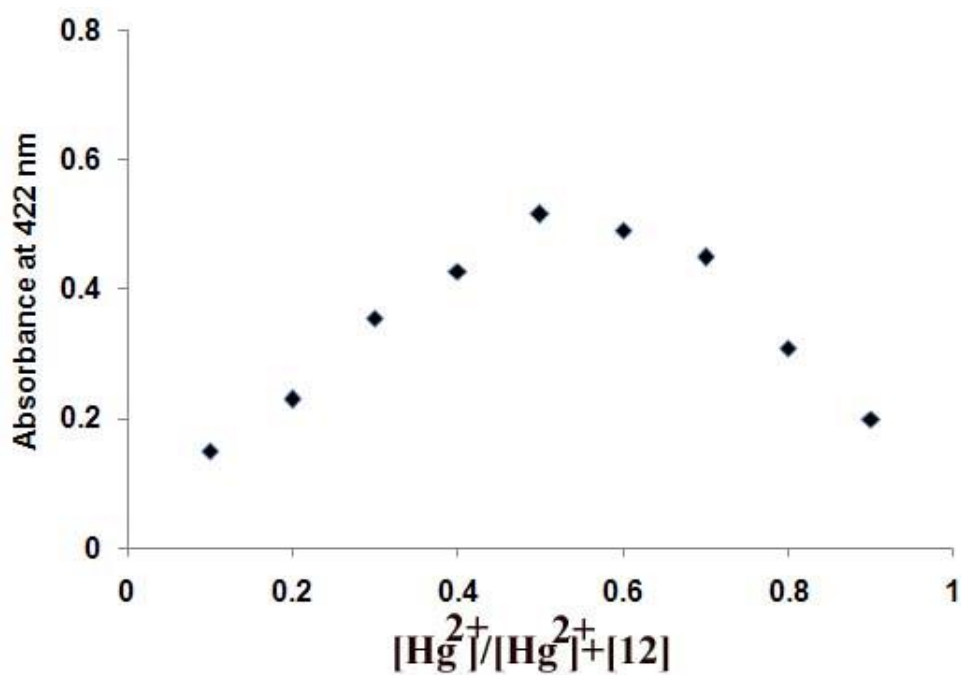

**SI Figure 73.** Job's plot for compound **12**, absorbance monitored at 448 nm.

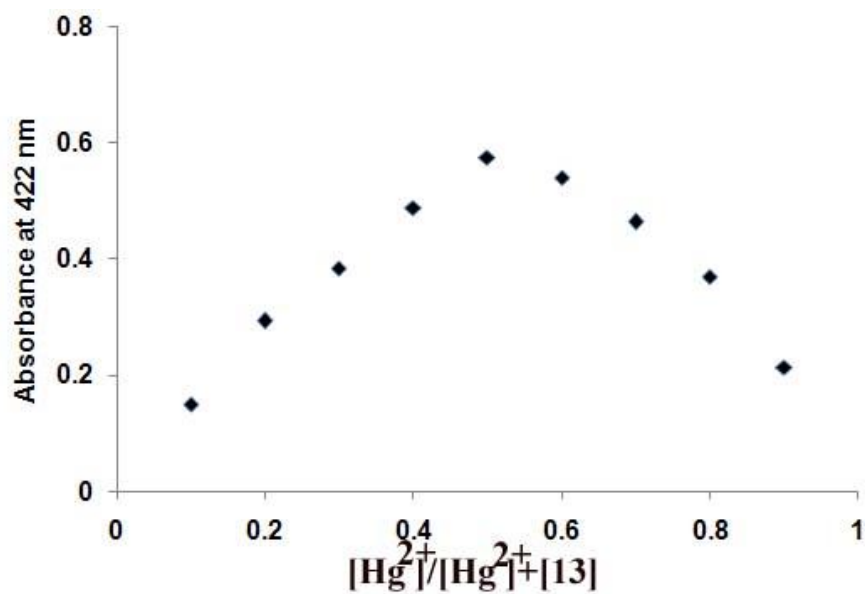

**SI Figure 74.** Job's plot for compound **13**, absorbance monitored at 467 nm.

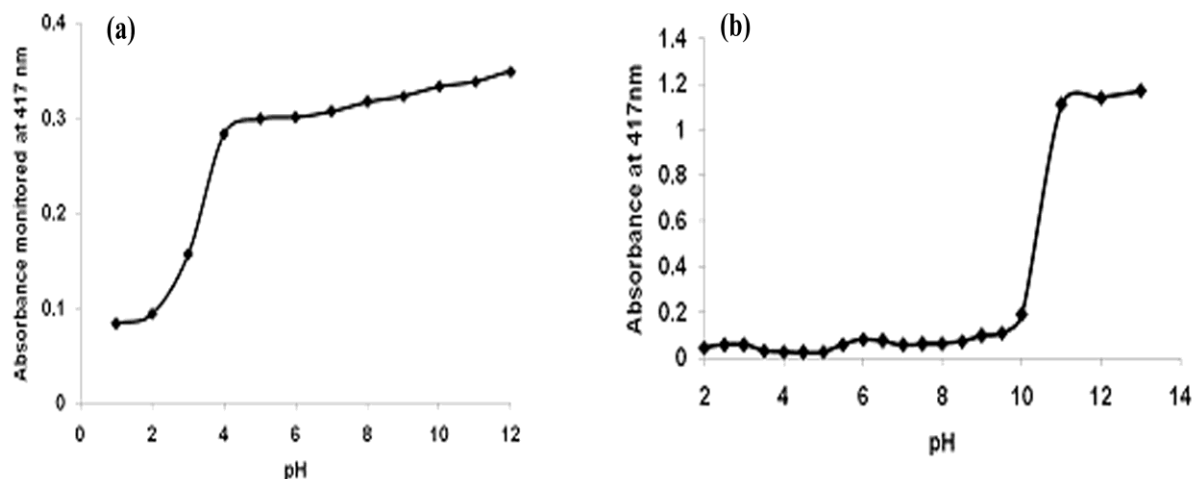

**SI Figure 75.** (a) Change in absorbance of compound **3** at 417 nm with pH, (b) Change in absorbance of compound **3** on addition of 1 equiv of  $\text{Hg}^{2+}$  ( $1 \mu\text{M}$ ) at different pH.

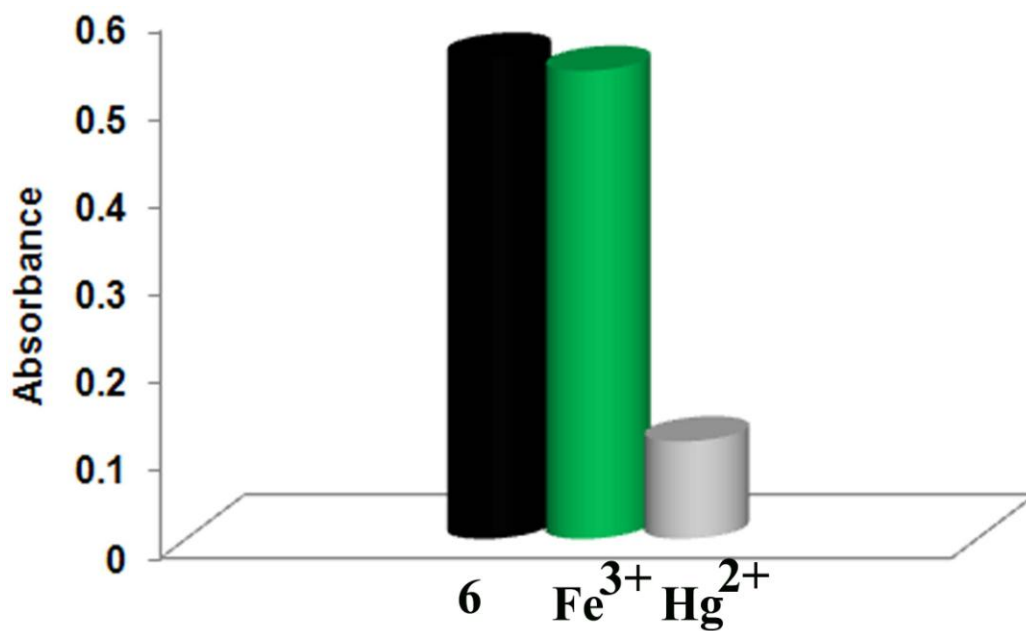

**SI Figure 76.** Bar graph showing the selectivity of compound **6** towards  $\text{Hg}^{2+}$  in presence of  $\text{Fe}^{3+}$  monitored at 434 nm.

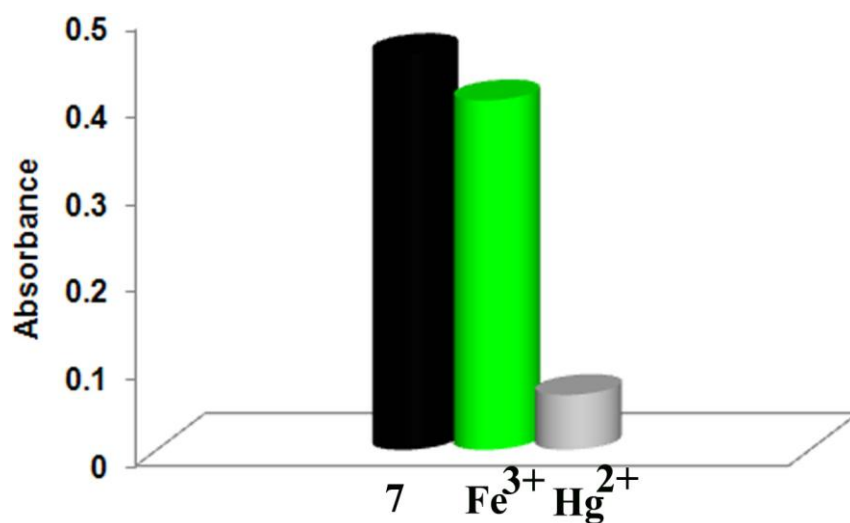

**SI Figure 77.** Bar graph showing the selectivity of compound **7** towards Hg<sup>2+</sup> in presence of Fe<sup>3+</sup> monitored at 439 nm.

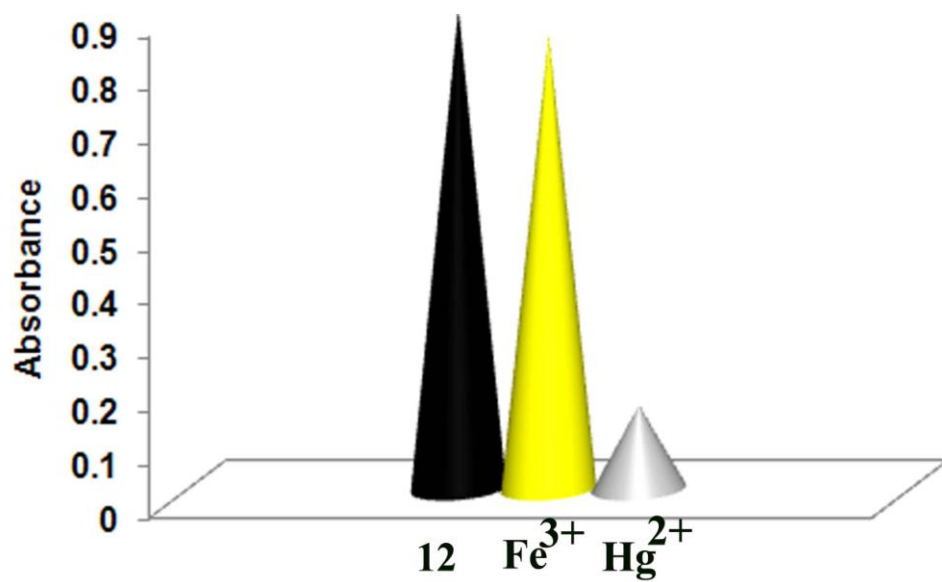

**SI Figure 78.** Bar graph showing selectivity of compound **12** towards Hg<sup>2+</sup> in presence of Fe<sup>3+</sup> monitored at 448 nm.

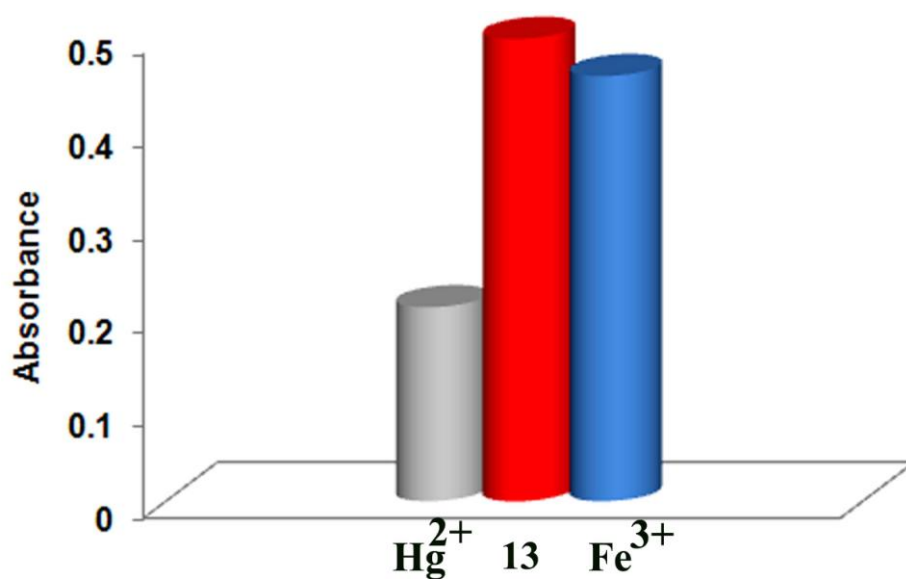

**SI Figure 79.** Bar graph showing the selectivity of compound **13** towards  $\text{Hg}^{2+}$  in presence of  $\text{Fe}^{3+}$  monitored at 467 nm.

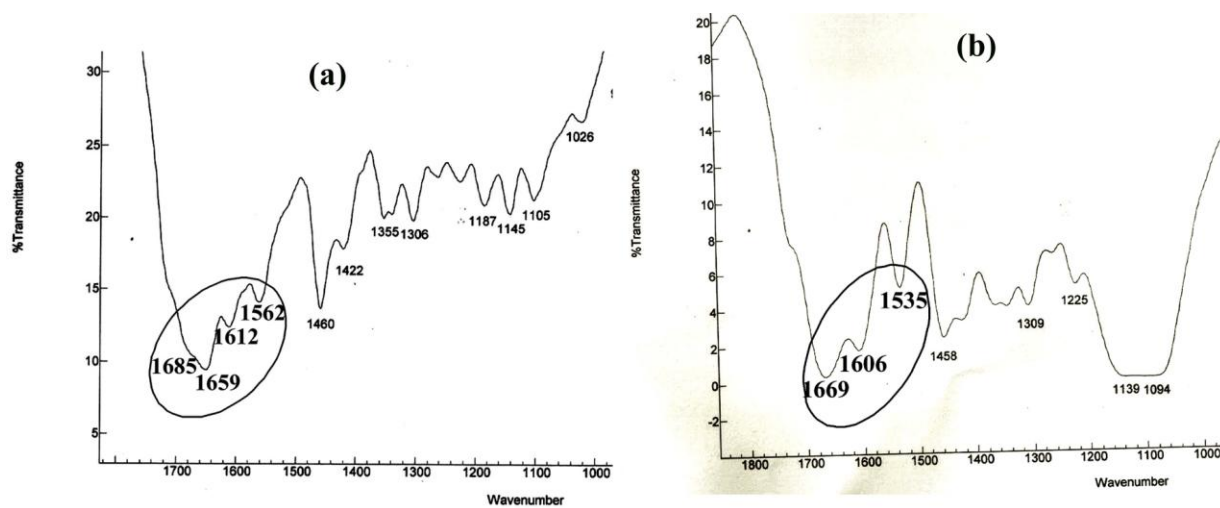

**SI Figure 80.** (a) A part of IR spectrum of compound **3**. (b) A part of IR spectrum of compound **3**· $\text{Hg}^{2+}$ .

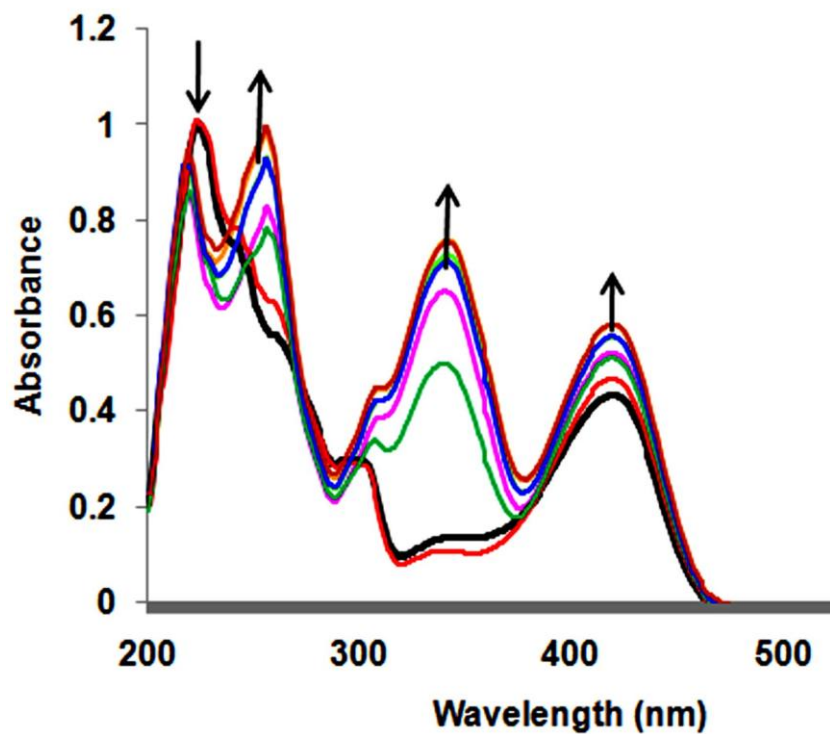

**SI Figure 81.** UV-vis spectra of compound **3** (5 μM) in water-ethanol (pH 7.2, v/v 9:1) upon addition of increasing amount of sodium cyanide (0.1-1 equiv).

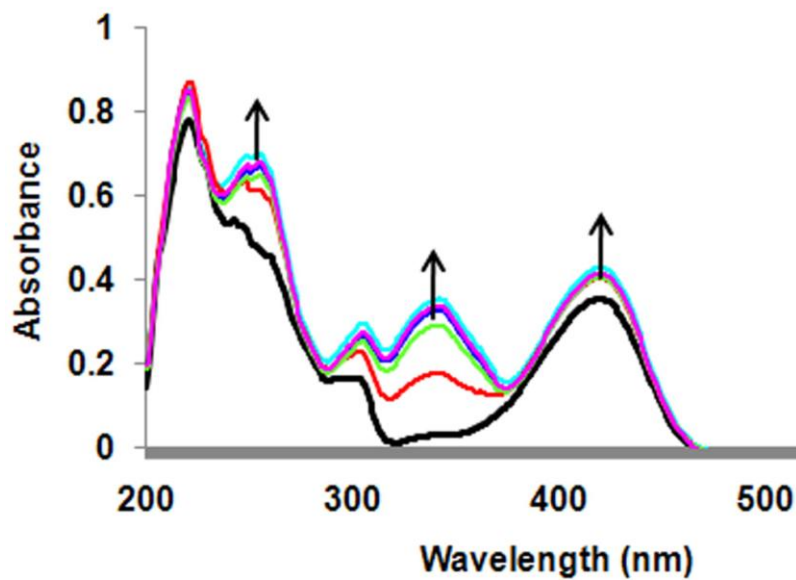

**SI Figure 82.** UV-vis spectra of compound **3** (5 μM) in acetonitrile (ACN) upon addition of increasing amount of TBACN (0.1-1 equiv).

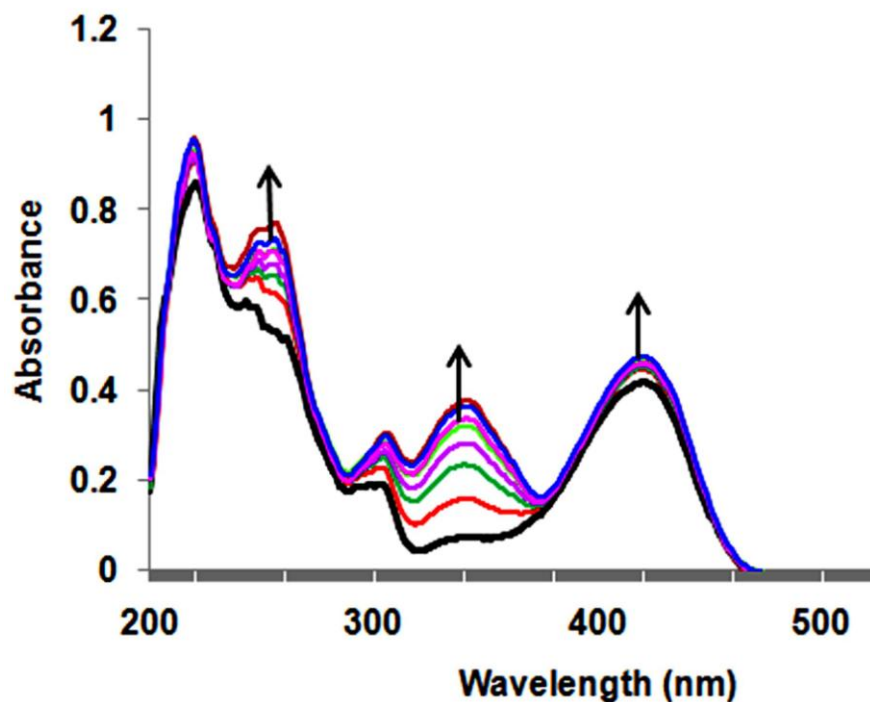

**SI Figure 83.** UV-vis spectra of compound **3** (5 μM) in chloroform (CHCl<sub>3</sub>) upon addition of increasing amount of TBACN (0.1-1 equiv).

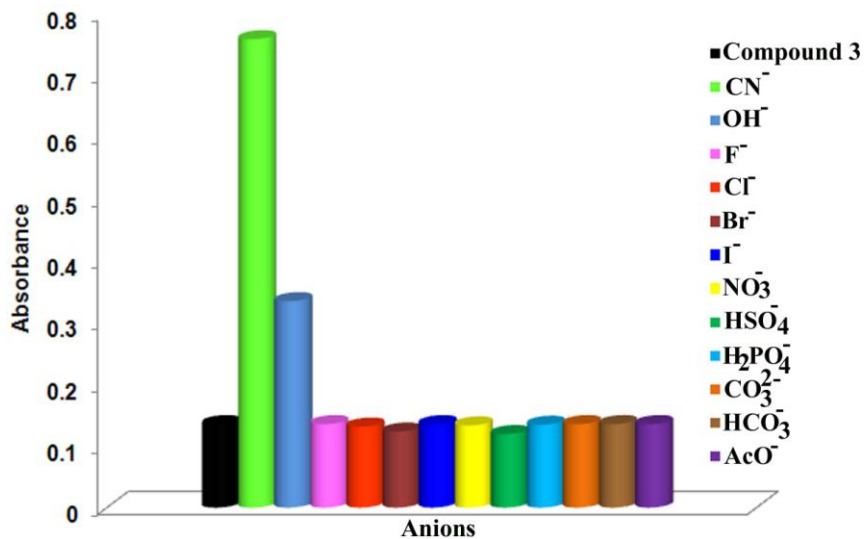

**SI Figure 84.** Bar graph shows absorbance of compound **3** at 341 nm in presence of 1 equiv of various anions.

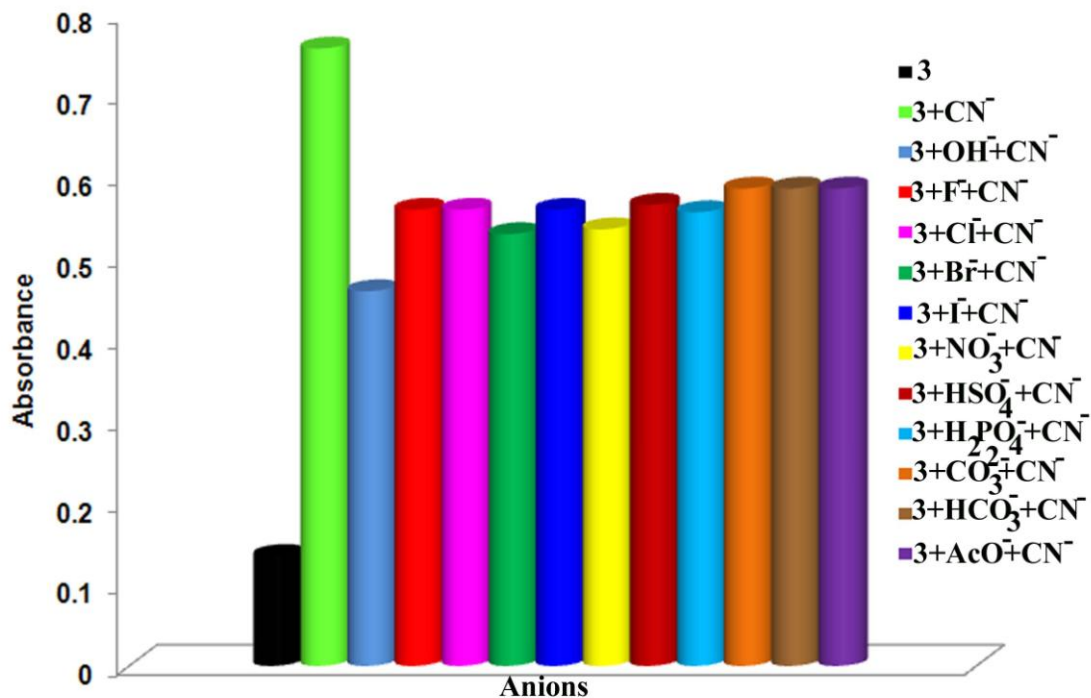

**SI Figure 85.** Competitive binding of compound **3** with  $\text{CN}^-$  in presence of other anions. Absorbance monitored at 341 nm.

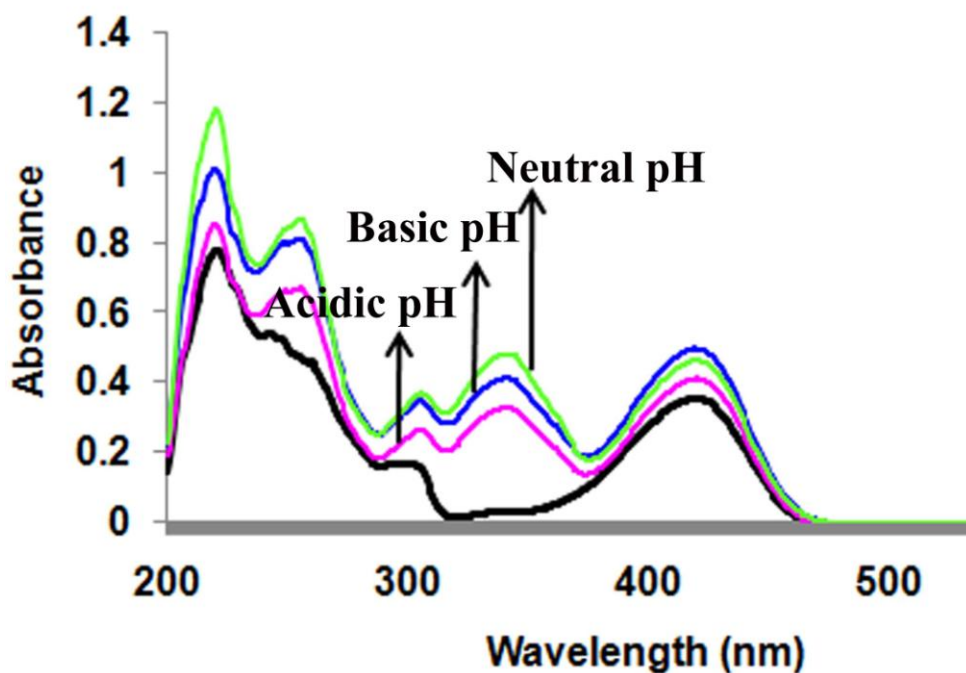

**SI Figure 86.** Change in UV-vis spectrum of compound **3** (black trace) on addition of 1 equiv of  $\text{CN}^-$  ( $1\ \mu\text{M}$ ) at pH 6-8.

**Table 1.** Binding constants for compounds **4-13**.

| Compound                                                                                         | Binding constant ( $M^{-1}$ ) |                   |
|--------------------------------------------------------------------------------------------------|-------------------------------|-------------------|
|                                                                                                  | Hg <sup>2+</sup>              | Fe <sup>3+</sup>  |
| 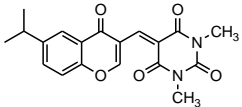<br><b>4</b>    | $7.1 \times 10^7$             | $2.8 \times 10^6$ |
| <br><b>5</b>    | $6.6 \times 10^8$             | $2 \times 10^8$   |
| <br><b>6</b>    | $3.8 \times 10^6$             | -                 |
| <br><b>7</b>    | $1.6 \times 10^7$             | -                 |
| <br><b>8</b>    | $1.5 \times 10^6$             | $2 \times 10^6$   |
| <br><b>9</b>  | $2.5 \times 10^6$             | $2.6 \times 10^6$ |
| <br><b>10</b> | $3.9 \times 10^7$             | $1.6 \times 10^6$ |
| <br><b>11</b> | $3.3 \times 10^7$             | $1.2 \times 10^6$ |
| <br><b>12</b> | $4.7 \times 10^6$             | -                 |
| <br><b>13</b> | $4.1 \times 10^6$             | -                 |
